# Supplementary material for: Cohort profile: Aichi regional sub-cohort of the Japan Environment and Children’s Study (JECS-A)
Source: PubMed Central journal article supplement — BMJ Open. 2019 Nov 12;9(11):e028105. doi: 10.1136/bmjopen-2018-028105 (PMC6858231; doi:10.1136/bmjopen-2018-028105), 2019-11-12
Supplement: bmjopen-2018-028105.draft_revisions.pdf [file bmjopen-2018-028105.draft_revisions.pdf]

# BMJ Open

BMJ Open is committed to open peer review. As part of this commitment we make the peer review history of every article we publish publicly available.

When an article is published we post the peer reviewers' comments and the authors' responses online. We also post the versions of the paper that were used during peer review. These are the versions that the peer review comments apply to.

The versions of the paper that follow are the versions that were submitted during the peer review process. They are not the versions of record or the final published versions. They should not be cited or distributed as the published version of this manuscript.

BMJ Open is an open access journal and the full, final, typeset and author-corrected version of record of the manuscript is available on our site with no access controls, subscription charges or pay-per-view fees (<http://bmjopen.bmj.com>).

If you have any questions on BMJ Open's open peer review process please email [info.bmjopen@bmj.com](mailto:info.bmjopen@bmj.com)

# BMJ Open

## Cohort profile: Aichi regional adjunct sub-cohort of the Japan Environment and Children's Study (JECS-A)

|                               |                                                                                                                                                                                                                                                                                                                                                                                                                                                                                                                                                                                                                                                                                                                                                                                                                                                                                                                                                                                                                                                                                                                                                                                                                                                                                                                                                                                                                                                                                                                                                                                                                                                                                                                                                                                                                                                                                                                                                                                                                                                                                                                                                                                                                                                                                                                                                                                                                                                                                                                                                                                                                                                         |
|-------------------------------|---------------------------------------------------------------------------------------------------------------------------------------------------------------------------------------------------------------------------------------------------------------------------------------------------------------------------------------------------------------------------------------------------------------------------------------------------------------------------------------------------------------------------------------------------------------------------------------------------------------------------------------------------------------------------------------------------------------------------------------------------------------------------------------------------------------------------------------------------------------------------------------------------------------------------------------------------------------------------------------------------------------------------------------------------------------------------------------------------------------------------------------------------------------------------------------------------------------------------------------------------------------------------------------------------------------------------------------------------------------------------------------------------------------------------------------------------------------------------------------------------------------------------------------------------------------------------------------------------------------------------------------------------------------------------------------------------------------------------------------------------------------------------------------------------------------------------------------------------------------------------------------------------------------------------------------------------------------------------------------------------------------------------------------------------------------------------------------------------------------------------------------------------------------------------------------------------------------------------------------------------------------------------------------------------------------------------------------------------------------------------------------------------------------------------------------------------------------------------------------------------------------------------------------------------------------------------------------------------------------------------------------------------------|
| Journal:                      | <i>BMJ Open</i>                                                                                                                                                                                                                                                                                                                                                                                                                                                                                                                                                                                                                                                                                                                                                                                                                                                                                                                                                                                                                                                                                                                                                                                                                                                                                                                                                                                                                                                                                                                                                                                                                                                                                                                                                                                                                                                                                                                                                                                                                                                                                                                                                                                                                                                                                                                                                                                                                                                                                                                                                                                                                                         |
| Manuscript ID                 | bmjopen-2018-028105                                                                                                                                                                                                                                                                                                                                                                                                                                                                                                                                                                                                                                                                                                                                                                                                                                                                                                                                                                                                                                                                                                                                                                                                                                                                                                                                                                                                                                                                                                                                                                                                                                                                                                                                                                                                                                                                                                                                                                                                                                                                                                                                                                                                                                                                                                                                                                                                                                                                                                                                                                                                                                     |
| Article Type:                 | Cohort profile                                                                                                                                                                                                                                                                                                                                                                                                                                                                                                                                                                                                                                                                                                                                                                                                                                                                                                                                                                                                                                                                                                                                                                                                                                                                                                                                                                                                                                                                                                                                                                                                                                                                                                                                                                                                                                                                                                                                                                                                                                                                                                                                                                                                                                                                                                                                                                                                                                                                                                                                                                                                                                          |
| Date Submitted by the Author: | 24-Nov-2018                                                                                                                                                                                                                                                                                                                                                                                                                                                                                                                                                                                                                                                                                                                                                                                                                                                                                                                                                                                                                                                                                                                                                                                                                                                                                                                                                                                                                                                                                                                                                                                                                                                                                                                                                                                                                                                                                                                                                                                                                                                                                                                                                                                                                                                                                                                                                                                                                                                                                                                                                                                                                                             |
| Complete List of Authors:     | <p>Ebara, Takeshi; Nagoya City University, Occupational and Environmental Health, Graduate school of Medical Sciences</p> <p>Yamada, Yasuyuki; Nagoya City University Graduate School of Medical Sciences and Medical School, Department of Occupational and Environmental Health; Juntendo University School of Health and Sports Science Graduate School of Health and Sports Science</p> <p>Shoji, Naoto; Nagoya City University Graduate School of Medical Sciences and Medical School, Department of Occupational and Environmental Health; Asahi University, School of Health Sciences</p> <p>Ito, Yuki; Nagoya City University Graduate School of Medical Sciences and Medical School, Department of Occupational and Environmental Health</p> <p>Nakagawa, Atsuko; Nagoya City University Faculty of Humanities and Social Sciences Graduate School of Humanities and Social Sciences</p> <p>Miyachi, Taishi; Nagoya City University Graduate School of Medical Sciences and Medical School, Pediatrics and Neonatology; Nagoya West District Care Center for Disabled Children</p> <p>Ozaki, Yasuhiko; Nagoya City University Graduate School of Medical Sciences and Medical School, Obstetrics and Gynecology</p> <p>Omori, Toyonori; Nagoya City University Graduate School of Medical Sciences and Medical School, Health Care Policy and Management</p> <p>Suzuki, Sadao; Nagoya City University Graduate School of Medical Sciences, Department of Public Health</p> <p>Kojima, Masayo ; Nagoya City University Graduate School of Medical Sciences and Medical School, Medical Education</p> <p>Ueyama, Jun; Nagoya University Graduate School of Medicine Faculty of Medicine, Department of Pathophysiological Laboratory Sciences, Field of Radiological and Medical Laboratory Sciences</p> <p>Tomizawa, Motohiro; Nagoya City University Graduate School of Medical Sciences and Medical School, Department of Occupational and Environmental Health; Tokyo University of Agriculture</p> <p>Kato, Sayaka; Nagoya City University Graduate School of Medical Sciences and Medical School, Department of Occupational and Environmental Health; Nagoya City University Graduate School of Medical Sciences and Medical School, Pediatrics and Neonatology</p> <p>Oguri, Tomoko; Nagoya City University Graduate School of Medical Sciences and Medical School, Department of Occupational and Environmental Health; National Institute of Advanced Industrial Science and Technology (AIST)</p> <p>Matsuki, Taro; Nagoya City University Graduate School of Medical Sciences and Medical School, Department of Occupational and</p> |

1  
2  
3  
4  
5  
6  
7  
8  
9  
10  
11  
12  
13  
14  
15  
16  
17  
18  
19  
20  
21  
22  
23  
24  
25  
26  
27  
28  
29  
30  
31  
32  
33  
34  
35  
36  
37  
38  
39  
40  
41  
42  
43  
44  
45  
46  
47  
48  
49  
50  
51  
52  
53  
54  
55  
56  
57  
58  
59  
60

|           |                                                                                                                                                                                                                                                                                                                                                                                                                                                                                                                                                                                                                                                                                                                                                       |
|-----------|-------------------------------------------------------------------------------------------------------------------------------------------------------------------------------------------------------------------------------------------------------------------------------------------------------------------------------------------------------------------------------------------------------------------------------------------------------------------------------------------------------------------------------------------------------------------------------------------------------------------------------------------------------------------------------------------------------------------------------------------------------|
|           | <p>Environmental Health<br/> Sato, Hirotaka; Nagoya City University Graduate School of Medical Sciences and Medical School, Department of Occupational and Environmental Health<br/> Oya, Naoko; Nagoya City University Graduate School of Medical Sciences and Medical School, Department of Occupational and Environmental Health<br/> Sugiura-Ogasawara , M; Nagoya City University Graduate School of Medical Sciences and Medical School, Obstetrics and Gynecology<br/> Saitoh, Shinji; Nagoya City University Graduate School of Medical Sciences and Medical School, Pediatrics and Neonatology<br/> Kamijima, Michihiro; Nagoya City University Graduate School of Medical Sciences, Department of Occupational and Environmental Health</p> |
| Keywords: | JECS, birth cohort, EPIDEMIOLOGY                                                                                                                                                                                                                                                                                                                                                                                                                                                                                                                                                                                                                                                                                                                      |
|           |                                                                                                                                                                                                                                                                                                                                                                                                                                                                                                                                                                                                                                                                                                                                                       |

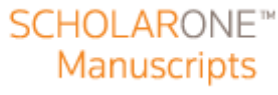

1  
2  
3  
4 **Cohort profile: Aichi regional adjunct sub-cohort of the Japan Environment and**  
5  
6 **Children's Study (JECS-A)**  
7  
8  
9

10 Takeshi Ebara<sup>1</sup>, Yasuyuki Yamada<sup>1,9</sup>, Naoto Shoji<sup>1,10</sup>, Yuki Ito<sup>1</sup>, Atsuko Nakagawa<sup>7</sup>, Taishi  
11 Miyachi<sup>2,11</sup>, Yasuhiko Ozaki<sup>3</sup>, Toyonori Omori<sup>4</sup>, Sadao Suzuki<sup>5</sup>, Masayo Kojima<sup>6</sup>, Jun  
12 Ueyama<sup>8</sup>, Motohiro Tomizawa<sup>1†</sup>, Sayaka Kato<sup>1,2</sup>, Tomoko Oguri<sup>1††</sup>, Taro Matsuki<sup>1</sup>, Hirotaka  
13 Sato<sup>1</sup>, Naoko Oya<sup>1</sup>, Mayumi Sugiura-Ogasawara<sup>3</sup>, Shinji Saitoh<sup>2</sup>, Michihiro Kamijima<sup>1</sup>  
14  
15

16  
17 Department of <sup>1</sup>Occupational and Environmental Health, <sup>2</sup>Pediatrics and Neonatology,  
18 <sup>3</sup>Obstetrics and Gynecology, <sup>4</sup>Health Care Policy and Management, <sup>5</sup>Public Health, <sup>6</sup>Medical  
19 Education, Nagoya City University, Graduate School of Medical Sciences, Nagoya, Japan  
20 <sup>7</sup>School of Humanities and Social Sciences, Nagoya City University, Nagoya, Japan  
21 <sup>8</sup>Department of Pathophysiological Laboratory Sciences, Field of Radiological and Medical  
22 Laboratory Sciences, Nagoya University Graduate School of Medicine, Japan.  
23 <sup>9</sup>Juntendo University Graduate School of Health and Sports Science, Chiba, Japan  
24 <sup>10</sup> Asahi University, School of Health Sciences  
25 <sup>11</sup>Nagoya West District Care Center for Disabled Children, Nagoya, Japan  
26  
27

28  
29 Present affiliation: †Tokyo University of Agriculture, ††National Institute of Advanced  
30 Industrial Science and Technology (AIST)  
31  
32

33 Corresponding Author:

34 Takeshi Ebara, PhD.

35 Department of Occupational and Environmental Health, Nagoya City University, Graduate  
36 School of Medical Sciences. Mizuho-ku, Nagoya, 4678601, Japan

37 TEL: 81-52-853-8171 FAX: 81-52-859-1228

38 e-mail: ebara@med.nagoya-cu.ac.jp  
39  
40  
41  
42  
43  
44  
45  
46  
47  
48  
49  
50  
51  
52  
53  
54  
55  
56  
57  
58  
59  
60

**ABSTRACT**

**Purpose:** Effects of fetal, perinatal and childhood environmental factors on the health of children at birth and during later life have recently become a topic of concern. The Aichi regional adjunct subcohort of the Japan Environment and Children's Study (JECS-A) is an ongoing birth cohort of pregnant women and their children that has been used to provide unique data on multifaceted potential factors affecting children's health.

**Participants:** The JECS-A is part of the Japan Environment and Children's Study (JECS) which follows a total of 100,000 pairs of children and their parents across 15 regions in Japan. Of the 8,134 pregnant women living in Ichinomiya City and Nagoya City, Japan, who were eligible for recruitment, a total of 5,721 pregnant women and their 5,555 children were included. Sociodemographic and psychological data as well as biological specimens were available for all the pregnant women in the cohort. Information on children included in the JECS-A was collected from their mothers and includes demographic, behavioral, childcare, psychological and psychiatric data. Biological specimens of urine extracted from disposable diapers and anthropometric data were also obtained.

**Findings to date:** Regarding the representativeness of the JECS-A, a similar distribution trend for age at delivery was confirmed between the pregnant women enrolled in the JECS-A and the national statistics of the relevant areas. However, differences in education level and household income were observed. A total of 5,502 children were enrolled in the cohort at 18 months after delivery. Compared with the national statistics, the basic demographics of the children in the cohort were representative of the population in the study area.

**Future plans:** The enrolled children in the JECS-A will be followed until the age of 13 years. The studies that comes from JECS-A will complement JECS and bring novel results with a high level of generalizability.

1  
2  
3  
4  
5 **Strengths and limitations of this study**

- 6  
7  
8  
9  
10  
11  
12  
13  
14  
15  
16  
17  
18  
19  
20  
21  
22  
23  
24  
25  
26  
27  
28  
29  
30  
31  
32  
33  
34  
35  
36  
37  
38  
39  
40  
41  
42  
43  
44  
45  
46  
47  
48  
49  
50  
51  
52  
53  
54  
55  
56  
57  
58  
59  
60
- The main strength of the J ECS-A of children is its large sample size, reflecting a representative population.
  - Another strength can be found in considering multifaceted potential factors affecting children's health in the prospective birth cohort over two generations.
  - The main limitation of the cohort is that the population with low-income households is not included.

For peer review only

## INTRODUCTION

The effects of fetal, perinatal and childhood environmental factors on the health of children at birth and during later life have recently become a topic of concern. A number of birth cohort studies are thus being conducted worldwide to address this issue, and the Japan Environment and Children's Study (JECS) is one of the largest. The JECS was launched in 2011 by the Ministry of the Environment, Japan, after 3 years of planning.<sup>1</sup> The JECS consists of nationwide regional sub-cohorts that can be used to conduct independent studies related to children's health. This article describes the cohort profile of a regional sub-cohort of the JECS, the Aichi regional adjunct sub-cohort of the JECS (JECS-A), containing 5,721 pregnant women and their 5,555 children. The following research themes are the possible main focuses of the JECS-A.

Special attention has been paid to neurodevelopmental disorders including intellectual disability, communication disorders, autism spectrum disorder (ASD), attention deficit hyperactivity disorder (ADHD), specific learning disorder, and motor disorders.<sup>2</sup> A review has indicated that the estimated prevalence of ASD in Asia before 1980 was around 1.9/10,000, but this figure has recently increased by ten times.<sup>3</sup> Though a previous study conducted in Denmark claimed that 33% of the increase in the prevalence of ASD in recent years can be accounted for by changes in the diagnostic criteria and reporting methods,<sup>4</sup> this increased prevalence remains a complex and highly controversial issue that needs to be addressed. Recent epidemiological studies have linked neurodevelopmental outcomes to prenatal exposure to environmental toxicants such as heavy metals,<sup>5,6</sup> prenatal tobacco exposure,<sup>7,8</sup> environmental tobacco exposure,<sup>9,10</sup> phthalates,<sup>11</sup> persistent organic pollutants,<sup>12,13</sup> and organophosphate pesticides (OPs).<sup>14,15 16</sup> Furthermore, interest is growing regarding the potential role of social stressors in modifying the relationship between neurodevelopmental outcomes and early

1  
2  
3  
4 childhood exposure. A cohort study of seven-year-old children suggested that social adversities  
5  
6 including a poor learning environment and parent-child interactions were significantly  
7  
8 associated with a moderate decrease in the intelligence quotient (IQ) score and its subset  
9  
10 scores.<sup>17</sup> Several recent studies have also discussed the effects of parent-child interactions,  
11  
12 focusing on the effects of alexithymia in mothers<sup>18</sup> and of depressive symptoms on parenting  
13  
14 stress.<sup>19</sup> These lines of evidence suggest that factors influencing children's neurodevelopment  
15  
16 have multifaceted aspects extending from the prenatal period to early childhood. Accumulating  
17  
18 knowledge gained from epidemiological studies suggests the need to investigate postnatal  
19  
20 influences, such as the effects of interactions between mothers and their children, as well as  
21  
22 prenatal exposures on the neurodevelopment of children.  
23  
24  
25  
26

27  
28 On the other hand, the establishment of a methodology for exposure assessments during  
29  
30 early childhood is also urgently required. Although the central nervous system develops rapidly  
31  
32 during early childhood, the amount of exposure to environmental chemical substances taken  
33  
34 into the bodies of infants has rarely been investigated because most infants wear diapers that  
35  
36 fully absorb all urine. Noninvasive biomonitoring using urine samples is required for exposure  
37  
38 assessments during early childhood, and a methodology for extracting urine from used  
39  
40 disposable diapers has also been studied.<sup>20 21</sup>  
41  
42  
43  
44

45 Furthermore, public health services in local communities must be capable of providing early  
46  
47 intervention support for children with neurodevelopmental disorders. Preventive screening for  
48  
49 the detection of disorders during the critical period of brain development during early  
50  
51 childhood can help to minimize later difficulties and to improve the trajectory of subjects with  
52  
53 ADHD in later life. A validated screening checklist for autism at the age of 2 years, called M-  
54  
55 CHAT-R/F,<sup>22</sup> is also available as part of early medical checkups, but this screening protocol  
56  
57 requires a 2-step screening test that must be conducted by a physician. The development of  
58  
59  
60



1  
2  
3  
4 secondary tools allowing easy and objective screening would provide a reliable means of  
5  
6 detecting disabilities at earlier stages, enabling the provision of early intervention support for  
7  
8 children with disabilities. One solution for earlier screening might be the second to fourth digit  
9  
10 (2D:4D) ratio, which is defined as the proportion between the lengths of the index and ring  
11  
12 fingers. Recent studies<sup>23 24</sup> have investigated whether the 2D:4D ratio, a controversial but  
13  
14 commonly used proxy marker of prenatal androgen concentrations based on the extreme male  
15  
16 brain theory, is associated with ASD. If anthropometric differences in the 2D:4D ratio could  
17  
18 be confirmed at an earlier stage of childhood, the 2D:4D ratio might be available as an  
19  
20 alternative and indirect screening measure. Another recent trend for early intervention can be  
21  
22 found in neonatal oral-motor assessments, such as sucking behavior. While contradictory  
23  
24 findings have been obtained,<sup>25</sup> a recent longitudinal study also showed interesting evidence  
25  
26 that some sucking behaviors in preterm infants are associated with later abnormal  
27  
28 neurodevelopmental outcomes at the age of 2 years.<sup>26</sup> As the available early screening tools  
29  
30 for the prediction of later neurodevelopmental outcomes are presently insufficient, further  
31  
32 research on the development of screening tools for early intervention is needed.  
33  
34  
35  
36  
37  
38  
39

40 The JECS-A was established in 2011 and has four main objectives: (1) to ascertain the effects  
41  
42 of prenatal and postnatal chemical exposures on pregnant women and their children; (2) to  
43  
44 investigate potential exposures for which the neurodevelopmental outcomes were modified by  
45  
46 the mothers' interactions with their children during early childhood; (3) to develop a  
47  
48 biomonitoring method using urine samples extracted from diapers for measuring internal  
49  
50 exposure to chemical substances; and (4) to ascertain the availabilities of secondary tools such  
51  
52 as the 2D:4D ratio or neonatal oral-motor assessments at earlier stages of childhood. This  
53  
54 article outlines the JECS-A cohort and its baseline data to date.  
55  
56  
57  
58  
59  
60

## COHORT DESCRIPTION

### Setting

The JECS is an ongoing nationwide birth cohort study with a total of 100,000 children and their parents across 15 regions in Japan.<sup>27 28 29</sup> To identify harmful factors in the environment affecting children's growth and health, a longitudinal study was planned and will be conducted from the fetal stage until the age of 13 years. An interdisciplinary team composed of toxicologists, psychologists, epidemiologists, hygienists, pediatricians, obstetricians and gynecologists, biostatisticians, and ergonomists at the Aichi Regional Center of the JECS designed the JECS-A as part of the JECS cohort. The study areas covered by the Aichi Regional Center of the JECS consist of Ichinomiya City (population of 387,000 in 2012) and Kita-ward in Nagoya City (population of 165,000 in 2012). Nagoya City consists of 16 wards with a population of over 2 million and is Japan's third largest industrial metropolis, next to Tokyo and Osaka. Kita-ward is in the northern part of Nagoya City. Ichinomiya City neighbors Nagoya City and traditionally was known as an area involved in textile production but is now a regional commercial and residential area with a mixed economy of manufacturing and agriculture. Both areas are relatively urban and widely known in the automobile and ceramics industries.

**Figure 1** shows a flowchart depicting each stage of study recruitment. A community-based recruitment strategy at 32 obstetric hospitals and clinics providing medical care for pregnant women in the study areas was adopted. Women in the early stage of pregnancy who visited an obstetrics facility were invited to participate in the JECS if they met the following criteria: (1) residence within the study areas, (2) an estimated delivery date after August 2011, and (3) an ability to read and write the Japanese language so as to complete the self-administered questionnaire. Of the 8,134 pregnant women who were invited as eligible recruits during the

1  
2  
3  
4 recruitment period from January 2011 to March 2014, a total of 5,721 (70.3%) participants  
5  
6 were enrolled as the baseline cohort of pregnant women.  
7

8  
9 After recruitment, the registered JECS participants were also invited to participate in the  
10  
11 JECS-A adjunct studies if they provided any of the following three types of consent: agreement  
12  
13 to complete the adjunct questionnaire survey only (Sub-cohort A1, n = 3,426), agreement to  
14  
15 provide maternal biological specimens in addition to agreeing to participate in Sub-cohort A1  
16  
17 (Sub-cohort A2, n = 2,924), and agreement to undergo genetic analyses in addition to agreeing  
18  
19 to participate in Sub-cohorts A1 and A2 (Sub-cohort A3, n = 1,753). Subsequently, of the 5,555  
20  
21 children, including 49 pairs of twins, born from the enrolled mothers, 57 children dropped out  
22  
23 of the study because of infant death (n = 7), mother death (n = 1), withdrawal of consent (n =  
24  
25 48), or a change in residence to an area outside the surveyed area (n = 1). On the other hand,  
26  
27 4 children who moved into the surveyed area from another area were included. As of 18 months  
28  
29 after delivery, a total of 5,502 children remained within the JECS-A cohort, accounting for  
30  
31 approximately 40% of the children born in the study area.  
32  
33  
34  
35  
36

37  
38 A second recruitment for the JECS-A adjunct studies was also planned, focusing on children.  
39  
40 We approached the guardians of targeted children at legal check-ups for 18-month-olds  
41  
42 provided at regional public health centers and health consultation centers. The recruitment  
43  
44 period was divided into two phases. Of the 5,502 children remaining in the JECS-A cohort at  
45  
46 18 months of age, a total of 2,576 children had reached the age of 18 months during the second  
47  
48 year of the 3-year recruitment period. During this second-year period, we conducted a survey  
49  
50 of the anthropometric measurements of the hands of 18-month-old children to confirm the  
51  
52 applicability of the 2D:4D ratio during early childhood. By gradually increasing the number  
53  
54 of recruitment facilities capable of obtaining the consent of the children's guardians during  
55  
56 this period, a total of 1,357 children (coverage of target samples: 52.7%, consent rate: 99.0%)  
57  
58  
59  
60

1  
2  
3  
4 were enrolled in Sub-cohort C. Subsequent to this recruitment, another recruitment was also  
5  
6 set for 18-month-old children born from mothers registered during the last year of the pregnant  
7  
8 women recruitment (Sub-cohort B). This cohort was specifically planned to collect biological  
9  
10 samples from diapers, and written informed consent for the adjunct survey involving the  
11  
12 provision of biological specimens from each child was obtained from 1,192 children (82.9%).  
13  
14 All the enrolled children had reached the age of 1.5 years as of June 2016. The follow-up  
15  
16 schedule for children beyond the age of 3 years has yet to be finalized, but these sub-cohorts  
17  
18 will be followed until the children reach the age of 13 years. Note that the above figures were  
19  
20 based on the data set jecs-ag-20160424, which was released in June, 2016, and on the  
21  
22 provisional data set determined as of August 1, 2018.  
23  
24  
25  
26  
27  
28  
29

### 30 **Patient and Public Involvement**

31  
32 To develop the JECS-A cohort, we have established a system for public involvement in  
33  
34 research, organizing an annual advisory committee consisting of the representatives from local  
35  
36 government, medical association, nursing association, women's group, lawyers and mass media.  
37  
38 The role of the committee offers advice and research questions from public concern, as  
39  
40 members of an external project supporting group. Moreover, the committee has great  
41  
42 contribution not only to sharing knowledge or engaging and creating a dialogue with the public,  
43  
44 but also to playing a valuable role in advising on recruitment of participants and suggesting  
45  
46 ideas for conducting the research. We also have held an open lecture for the participants every  
47  
48 year since 2012, as an opportunity in which information and knowledge about research is  
49  
50 provided and disseminated.  
51  
52  
53  
54  
55  
56  
57  
58  
59

### 60 **Data collection and measurements**

1  
2  
3  
4 The measurements collected for the adjunct studies of JECS in the JECS-A are summarized  
5  
6 in **Table 1**. Data acquisition for some socio-demographics and neurodevelopmental outcomes  
7  
8 was planned within the main body of the JECS.  
9

10  
11 The adjunct cohorts were designed for four specific main objectives. First, to challenge the  
12  
13 multifaceted problems surrounding children's development, Sub-cohort A1 was formed with  
14  
15 the intention of collecting data on longitudinal changes in prenatal and postnatal exposures  
16  
17 considered to affect neurodevelopmental outcomes. One of our special concerns is the effect  
18  
19 of alexithymia in mothers on early child development. The 20-item Toronto Alexithymia Scale  
20  
21 (TAS-20)<sup>30</sup> will be used to measure this trait as a primary factor, and studies will investigate  
22  
23 the pregnancy and perinatal outcomes and/or the developmental outcomes of postnatal infants.  
24  
25 As there are many potential determinants extending from the prenatal to early childhood period,  
26  
27 the risks will be estimated using the mother's and child's demographic variables or other  
28  
29 related factors as confounding factors.  
30  
31  
32  
33

34  
35 Sub-cohort A1 will also be used to examine the relationship between neonatal oral-motor  
36  
37 assessments and subsequent abnormal neurodevelopmental outcomes. Using the short version  
38  
39 of Infant Behavior Questionnaire (IBQ) and Early Childhood Behavior Questionnaire (ECBQ)  
40  
41 as factors reflecting temperamental self-regulation, the utility of such assessments as early  
42  
43 screening tools for predicting subsequent neurodevelopmental outcomes will be verified.  
44  
45  
46

47  
48 Sub-cohorts A2 and A3 will mainly focus on studies using biological specimens (urine,  
49  
50 serum, and/or whole blood) obtained from pregnant women. These biological samples will be  
51  
52 used for exposure assessments, single nucleotide polymorphism analyses, and activity  
53  
54 determinations of chemical metabolism-related enzymes, and so on. Data on the levels of  
55  
56 urinary exposure biomarkers including chemical metabolites will be combined with those in  
57  
58 sub-cohort B and, eventually, the longitudinal exposure trajectory and the relationships  
59  
60

1  
2  
3  
4 between exposure and health outcomes will also be analyzed. These cohorts will be used to  
5  
6 derive human biomonitoring reference values (e.g., RV95) for chemicals in urine samples for  
7  
8 the general population of Japanese pregnant women.  
9

10  
11 Sub-cohort B will be used to clarify the chemical exposure levels in infants and toddlers.  
12  
13 Biological monitoring data for chemical exposure during early childhood are limited because  
14  
15 the collection of urine from non-toilet-trained children is difficult. To estimate the amount of  
16  
17 exposure to environmental chemical substances in the bodies of infants, the sub-cohort will be  
18  
19 used to study a noninvasive biomonitoring approach using urine samples extracted from used  
20  
21 disposable diapers. This cohort will also be used to determine the reference values for  
22  
23 chemicals in urine samples for the general population of Japanese young children.  
24  
25  
26

27  
28 Sub-cohort C will be used to study anthropometric measurements of the lengths of digits on  
29  
30 both hands in children. A previous study suggested that autistic children aged 2 to 14 years  
31  
32 have a smaller 2nd digit to 4th digit (2D:4D) ratio than normal children of the same  
33  
34 generation.<sup>31</sup> However, little is known about whether the 2D:4D ratio in Japanese infants and  
35  
36 children under the age of 2 years can be used for the early diagnosis of autism, and the results  
37  
38 of studies are contradictory. Thus, Sub-cohort C was designed to investigate the longitudinal  
39  
40 changes in 2D:4D ratios in 18-month-old and 36-month-old infants. As for the anthropometric  
41  
42 measurements of the palms and digits of the children's hands, we have established a specialized  
43  
44 protocol involving photographic records and digit measurements that has a high reliability  
45  
46 (Intra/Inter-Class Correlations:  $ICC_1 = 0.97$  [95% CI, 0.87-0.99],  $ICC_3 = 0.93$  [0.83-0.98]). In  
47  
48 short, our easy-to-use photocopying method, which involves placing the child's palm on a box  
49  
50 composed of transparent acrylic thin plates and photographing it from a digital camera fixed  
51  
52 inside the box, was devised for application in mandatory health checkup settings. All the  
53  
54 2D:4D ratio data will be obtained using this protocol.  
55  
56  
57  
58  
59  
60

1  
2  
3  
4 The JECS-A sub-cohorts do not include any information regarding medical diagnoses  
5  
6 affecting neurodevelopmental outcomes at this time, but such information will be available in  
7  
8 the future through the main data of the JECS, which is being conducted under the same protocol  
9  
10 across 15 regions in Japan.  
11  
12  
13  
14  
15

## 16 FINDINGS TO DATE

17  
18 **Table 2** shows the main socio-demographic characteristics of the pregnant women. To  
19  
20 ascertain whether the JECS-A baseline profiles are representative of the pregnant women in  
21  
22 the study areas in general, the national statistics for Aichi prefecture including Nagoya City  
23  
24 and Ichinomiya City (since data for smaller areas were not available) were substituted and  
25  
26 included in the table. Similar distribution trends for variables such as “Age at delivery” were  
27  
28 confirmed when the JECS-A baseline cohort of pregnant women and the national statistics  
29  
30 were compared; however, differences in “Education level” and “Household income” were  
31  
32 observed. Regarding education level, the percentage of JECS participants who had graduated  
33  
34 from high school was relatively low, compared with the national statistics (25.1% vs. 39.7%),  
35  
36 while the percentage of college/junior college/technology college students was higher among  
37  
38 the JECS participants, compared with the national statistics (35.3% vs. 20.8%). Moreover, the  
39  
40 number of JECS-A participants with a household income of 2 million yen or less was about  
41  
42 1/8 of the national statistics. Likewise, unemployed participants (mainly housewives)  
43  
44 accounted for 45% of the JECS-A cohort. These results suggest a possible selection bias. We  
45  
46 recruited pregnant women who had visited the obstetric facilities during the daytime; this might  
47  
48 have resulted in a lower study participation rate among pregnant employees.  
49  
50  
51  
52  
53  
54  
55

56  
57 As for the baseline cohort of children, a total of 5,502 (99.0%) of the 5,555 children remained  
58  
59 in the JECS-A at 18 months after delivery (provisional figures as of August 1, 2018). **Table 3**  
60

1  
2  
3  
4 compares the baseline data of the newborns with the national statistics. Basic demographics  
5 including “Sex”, “Birth weight” and “Birth height” had similar distributions, indicating the  
6 representativeness of the sample.  
7  
8  
9

10  
11 Similarly, **Table 4** shows the fundamental characteristics of the pregnant women and their  
12 children in each sub-cohort of the JECS-A. No notable differences in the descriptive statistics  
13 were observed among the sub-cohorts. Furthermore, the drop-out rates for each sub-cohort, to  
14 date, have been maintained at less than 10% relative to the baseline. However, 10% of the sub-  
15 cohort values for household income are missing because many participants did not provide  
16 information on the income. Therefore, caution is needed when using this variable as a  
17 confounding factor in multiple regression analyses.  
18  
19  
20  
21  
22  
23  
24  
25  
26  
27  
28  
29

## 30 **STRENGTHS AND LIMITATIONS**

31  
32  
33 The main strength of the JECS-A of children is its large sample size, reflecting a  
34 representative population. Approximately 40% of the children born in the study area have been  
35 included in the study to date. The participating children will be followed until they reach the  
36 age of 13 years. The study protocol<sup>32</sup> of the JECS decided on a target retention rate of 80% or  
37 higher at the age of 13 years. The linkage between the JECS-A sub-cohort and the main data  
38 of the JECS study will further allow novel and challenging studies with a high generalizability.  
39  
40  
41  
42  
43  
44  
45  
46

47 The main weakness of the JECS-A cohort concerns the pregnant women participants. A  
48 relatively large proportion of single-income, middle-class households were included in the  
49 JECS-A; many low-income households refused to participate in the surveys, and some  
50 participants did not provide information concerning their household income. Regarding the  
51 latter, the impact of the missing values can be adjusted to some extent using the multiple  
52 imputation method. However, researchers must take into account the effect of response biases  
53  
54  
55  
56  
57  
58  
59  
60



1  
2  
3  
4 when conducting statistical analyses using paired data for pregnant women and their children  
5  
6 and when interpreting these results.  
7  
8  
9

## 10 **COLLABORATION**

11  
12  
13 The original data and specimens will be made available to investigators and stakeholders  
14 working within the JECS-A project. The study must adhere to the JECS policy on the  
15 availability of research results, publications, intellectual property rights, and data sharing. At  
16 the moment, the Ethical Guidelines for Medical and Health Research Involving Human  
17 Subjects enforced by the Japan Ministry of Education, Culture, Sports, Science and  
18 Technology and the Ministry of Health, Labour and Welfare restrict the open sharing of  
19 epidemiologic data. This means that researchers interested in using the data must collaborate  
20 with and participate in the JECS-A project. This project was recently started and is still ongoing.  
21 We are open to new proposals that fall within the nature of the JECS-A cohort.  
22  
23  
24  
25  
26  
27  
28  
29  
30  
31  
32  
33  
34  
35  
36  
37

## 38 **Acknowledgements**

39  
40 We would like to express our gratitude to all the JECS-A cohort participants. We also express  
41 our sincere appreciation to the collaborating hospitals, clinics, local healthcare centers, local  
42 government agencies in Nagoya City and Ichinomiya City, and the JECS-A staff members for  
43 their continuous assistance in promoting this study. The authors also specially thank Takaaki  
44 Hiraiwa, Hiroki Yoshizoe, Maiko Miyata, Hirohisa Kano and Takahiro Kurihara for the data  
45 management and their assistance in the data analysis.  
46  
47  
48  
49  
50  
51  
52  
53  
54  
55  
56

## 57 **Contributors**

58  
59 TE designed the JECS-A cohort architecture, developed the protocol, analyzed the data, and  
60

1  
2  
3  
4 wrote the first draft of the manuscript. YY and MT organized the study team, obtained  
5  
6 approvals and contributed to the development of the protocol, design, and data collection tools.  
7  
8 TOm was in charge of coordination with relevant organizations and organized the JECS-A  
9  
10 members. NS, SK, TMa and TOg performed the analysis and interpreted the data. YI, HS, NO  
11  
12 and JU designed and developed the protocol for the JECS-A sub-cohorts A2, A3 and B and  
13  
14 edited and analyzed the data. AN, MK, YO, TMi, SSu, MSO and SSa designed each adjunct  
15  
16 study, supervised the data collection, and drafted the manuscript. MK was a member of the  
17  
18 JECS Steering Committee, was responsible for the study design and protocol, supervised the  
19  
20 data collection, and edited and drafted the manuscript. All the authors interpreted the data,  
21  
22 contributed to the writing of the manuscript, revised it critically for important intellectual  
23  
24 content, and agreed with the final version and the findings.  
25  
26  
27  
28  
29  
30  
31  
32

33 **Funding** The Japan Environment and Children's Study was funded by the Ministry of the  
34  
35 Environment, Japan. This work was also supported by grants from the Environment Research  
36  
37 and Technology Development Fund (ERTDF, No 5-1551 and 5-1851), Japan Society for the  
38  
39 Promotion of Science (JSPS) KAKENHI Grant Number 16H03733, 25293151, 25285185 and  
40  
41 Grants-in-aid for research of Nagoya City University (2011-6, 2012-4, 2013-2, 2013-10, 2014-  
42  
43 4, 2015-10, 2016-4).  
44  
45  
46  
47  
48  
49

50 **Competing Interests** None declared  
51  
52  
53

54 **Ethical approval** This study was approved by the Review Board of the Ministry of the  
55  
56 Environment, by the Institutional Review Board of Nagoya City University Graduate School  
57  
58 of Medical Sciences (No. 70-00-0134; No. 00000544-6, 00000574-2) and by the Ethics  
59  
60

1  
2  
3  
4 Committees of all participating institutions.  
5  
6  
7

8 **Data sharing statement** The original data and specimens will be made available to  
9  
10 investigators and stakeholders working within the JECS-A project.  
11

12  
13 Researchers interested in collaborations or further information should contact the JECS-A  
14  
15 secretariat by e-mail at [eisei@med.nagoya-cu.ac.jp](mailto:eisei@med.nagoya-cu.ac.jp).  
16  
17

18  
19  
20 **Disclaimer** The findings and conclusions of this article are solely the responsibility of the  
21  
22 authors and do not represent the official views of the Japanese government.  
23  
24  
25

## 26 27 28 29 30 **REFERENCES**

- 31  
32  
33 1. Ishitsuka K, Nakayama SF, Kishi R, et al. Japan Environment and Children's Study:  
34  
35 backgrounds, activities, and future directions in global perspectives. *Environ Health*  
36  
37 *Prev Med* 2017;22(1):61. doi: 10.1186/s12199-017-0667-y  
38  
39  
40 2. American Psychiatric Association. Diagnostic and Statistical Manual of Mental Disorders  
41  
42 (DSM–5): American Psychiatric Association Publishing 2013:xiii-xv.  
43  
44  
45 3. Xiang S, Carrie A. A review of the prevalence of Autism Spectrum Disorder in Asia,  
46  
47 Research in Autism Spectrum Disorders. *Autism Spectrum Disorders* 2010;4(2):156-67.  
48  
49 doi: <http://dx.doi.org/10.1016/j.rasd.2009.10.003>.  
50  
51  
52 4. Hansen SN, Schendel DE, Parner ET. Explaining the increase in the prevalence of autism  
53  
54 spectrum disorders: the proportion attributable to changes in reporting practices. *JAMA*  
55  
56 *Pediatr* 2015;169(1):56-62. doi: 10.1001/jamapediatrics.2014.1893  
57  
58  
59 5. Rodriguez-Barranco M, Lacasana M, Aguilar-Garduno C, et al. Association of arsenic,  
60

- 1  
2  
3  
4 cadmium and manganese exposure with neurodevelopment and behavioural disorders in  
5  
6 children: a systematic review and meta-analysis. *Sci Total Environ* 2013;454-455:562-  
7  
8 77. doi: 10.1016/j.scitotenv.2013.03.047  
9  
10  
11 6. Rodrigues EG, Bellinger DC, Valeri L, et al. Neurodevelopmental outcomes among 2- to 3-  
12  
13 year-old children in Bangladesh with elevated blood lead and exposure to arsenic and  
14  
15 manganese in drinking water. *Environ Health* 2016;15:44. doi: 10.1186/s12940-016-  
16  
17 0127-y  
18  
19  
20  
21 7. Melchior M, Hersi R, van der Waerden J, et al. Maternal tobacco smoking in pregnancy and  
22  
23 children's socio-emotional development at age 5: The EDEN mother-child birth cohort  
24  
25 study. *Eur Psychiatry* 2015;30(5):562-8. doi: 10.1016/j.eurpsy.2015.03.005  
26  
27  
28 8. Joelsson P, Chudal R, Talati A, et al. Prenatal smoking exposure and neuropsychiatric  
29  
30 comorbidity of ADHD: a finnish nationwide population-based cohort study. *BMC*  
31  
32 *Psychiatry* 2016;16:306. doi: 10.1186/s12888-016-1007-2  
33  
34  
35 9. Han JY, Kwon HJ, Ha M, et al. The effects of prenatal exposure to alcohol and environmental  
36  
37 tobacco smoke on risk for ADHD: a large population-based study. *Psychiatry Res*  
38  
39 2015;225(1-2):164-8. doi: 10.1016/j.psychres.2014.11.009  
40  
41  
42 10. Padron A, Galan I, Garcia-Esquinas E, et al. Exposure to secondhand smoke in the home  
43  
44 and mental health in children: a population-based study. *Tob Control* 2016;25(3):307-  
45  
46 12. doi: 10.1136/tobaccocontrol-2014-052077  
47  
48  
49  
50 11. Polanska K, Ligocka D, Sobala W, et al. Phthalate exposure and child development: the  
51  
52 Polish Mother and Child Cohort Study. *Early Hum Dev* 2014;90(9):477-85. doi:  
53  
54 10.1016/j.earlhumdev.2014.06.006  
55  
56  
57 12. Kyriklaki A, Vafeiadi M, Kampouri M, et al. Prenatal exposure to persistent organic  
58  
59 pollutants in association with offspring neuropsychological development at 4years of  
60

- 1  
2  
3  
4 age: The Rhea mother-child cohort, Crete, Greece. *Environ Int* 2016;97:204-11. doi:  
5  
6 10.1016/j.envint.2016.09.012  
7  
8  
9 13. Goudarzi H, Nakajima S, Ikeno T, et al. Prenatal exposure to perfluorinated chemicals and  
10  
11 neurodevelopment in early infancy: The Hokkaido Study. *Sci Total Environ*  
12  
13 2016;541:1002-10. doi: 10.1016/j.scitotenv.2015.10.017  
14  
15  
16 14. Yolton K, Cornelius M, Ornoy A, et al. Exposure to neurotoxicants and the development  
17  
18 of attention deficit hyperactivity disorder and its related behaviors in childhood.  
19  
20 *Neurotoxicol Teratol* 2014;44:30-45. doi: 10.1016/j.ntt.2014.05.003  
21  
22  
23 15. Engel SM, Wetmur J, Chen J, et al. Prenatal exposure to organophosphates, paraoxonase  
24  
25 1, and cognitive development in childhood. *Environ Health Perspect* 2011;119(8):1182-  
26  
27 8. doi: 10.1289/ehp.1003183  
28  
29  
30 16. Bouchard MF, Chevrier J, Harley KG, et al. Prenatal exposure to organophosphate  
31  
32 pesticides and IQ in 7-year-old children. *Environ Health Perspect* 2011;119(8):1189-  
33  
34 95. doi: 10.1289/ehp.1003185  
35  
36  
37 17. Stein LJ, Gunier RB, Harley K, et al. Early childhood adversity potentiates the adverse  
38  
39 association between prenatal organophosphate pesticide exposure and child IQ: The  
40  
41 CHAMACOS cohort. *Neurotoxicology* 2016;56:180-87. doi:  
42  
43 10.1016/j.neuro.2016.07.010  
44  
45  
46  
47 18. Yurumez E, Akca OF, Ugur C, et al. Mothers' alexithymia, depression and anxiety levels  
48  
49 and their association with the quality of mother-infant relationship: a preliminary study.  
50  
51 *Int J Psychiatry Clin Pract* 2014;18(3):190-6. doi: 10.3109/13651501.2014.940055  
52  
53  
54 19. Li Y, Jiang WQ, Du YS, et al. Relationships between behavioral symptoms of non-  
55  
56 medicated Chinese children with attention deficit hyperactivity disorder and parenting  
57  
58 stress: Comparison of different subtypes and comorbidities. *Asia Pac Psychiatry*  
59  
60

- 2016;8(2):127-35. doi: 10.1111/appy.12213
20. Oya N, Ito Y, Hioki K, et al. Quantitative analysis of organophosphate insecticide metabolites in urine extracted from disposable diapers of toddlers in Japan. *Int J Hyg Environ Health* 2017;220(2 Pt A):209-16. doi: 10.1016/j.ijheh.2016.10.009
21. Saito S, Ueyama J, Kondo T, et al. A non-invasive biomonitoring method for assessing levels of urinary pyrethroid metabolites in diapered children by gas chromatography-mass spectrometry. *J Expo Sci Environ Epidemiol* 2014;24(2):200-7. doi: 10.1038/jes.2013.31
22. Robins DL, Casagrande K, Barton M, et al. Validation of the modified checklist for Autism in toddlers, revised with follow-up (M-CHAT-R/F). *Pediatrics* 2014;133(1):37-45. doi: 10.1542/peds.2013-1813
23. Teatero ML, Netley C. A critical review of the research on the extreme male brain theory and digit ratio (2D:4D). *J Autism Dev Disord* 2013;43(11):2664-76. doi: 10.1007/s10803-013-1819-6
24. Guyatt AL, Heron J, Knight Ble C, et al. Digit ratio and autism spectrum disorders in the Avon Longitudinal Study of Parents and Children: a birth cohort study. *BMJ Open* 2015;5(8):e007433. doi: 10.1136/bmjopen-2014-007433
25. Slattery J, Morgan A, Douglas J. Early sucking and swallowing problems as predictors of neurodevelopmental outcome in children with neonatal brain injury: a systematic review. *Dev Med Child Neurol* 2012;54(9):796-806. doi: 10.1111/j.1469-8749.2012.04318.x
26. Wolthuis-Stigter MI, Luinge MR, da Costa SP, et al. The association between sucking behavior in preterm infants and neurodevelopmental outcomes at 2 years of age. *J Pediatr* 2015;166(1):26-30. doi: 10.1016/j.jpeds.2014.09.007

- 1  
2  
3  
4 27. Kawamoto T, Nitta H, Murata K, et al. Rationale and study design of the Japan environment  
5  
6 and children's study (JECS). *BMC Public Health* 2014;14:25. doi: 10.1186/1471-2458-  
7  
8 14-25  
9  
10  
11 28. Michikawa T, Nitta H, Nakayama SF, et al. The Japan Environment and Children's Study  
12  
13 (JECS): A Preliminary Report on Selected Characteristics of Approximately 10 000  
14  
15 Pregnant Women Recruited During the First Year of the Study. *J Epidemiol*  
16  
17 2015;25(6):452-8. doi: 10.2188/jea.JE20140186  
18  
19  
20  
21 29. Michikawa T, Nitta H, Nakayama SF, et al. Baseline Profile of Participants in the Japan  
22  
23 Environment and Children's Study (JECS). *J Epidemiol* 2018;28(2):99-104. doi:  
24  
25 10.2188/jea.JE20170018  
26  
27  
28 30. Moriguchi Y, Maeda M, Igarashi T, et al. Age and gender effect on alexithymia in large,  
29  
30 Japanese community and clinical samples: a cross-validation study of the Toronto  
31  
32 Alexithymia Scale (TAS-20). *Biopsychosoc Med* 2007;1:7. doi: 10.1186/1751-0759-1-  
33  
34 7  
35  
36  
37  
38 31. Manning JT, Baron-Cohen S, Wheelwright S, et al. The 2nd to 4th digit ratio and autism.  
39  
40 *Dev Med Child Neurol* 2001;43(3):160-4.  
41  
42  
43 32. National Centre for Japan Environment and Children's study. Japan Environment and  
44  
45 Children's study (JECS), Study Protocol (ver. 1.4) [Available from:  
46  
47 [https://www.env.go.jp/en/chemi/hs/jecs/data/about/jecs-study\\_protocol\\_14\\_en.pdf](https://www.env.go.jp/en/chemi/hs/jecs/data/about/jecs-study_protocol_14_en.pdf).  
48  
49  
50  
51  
52  
53  
54  
55  
56  
57  
58  
59  
60

**Table 1** Summary of measurements collected for the adjunct JECS-A study

| Main items                                      | Sub-cohort covered                                                                       |    |    |   |   | Timing of measurement |     |                                |     |      |      |
|-------------------------------------------------|------------------------------------------------------------------------------------------|----|----|---|---|-----------------------|-----|--------------------------------|-----|------|------|
|                                                 | A1                                                                                       | A2 | A3 | B | C | prenatal (weeks)      |     | postnatal (months after birth) |     |      |      |
|                                                 |                                                                                          |    |    |   |   | <22                   | ≥22 | 1 m                            | 6 m | 18 m | 24 m |
| <b>Pregnant women</b>                           |                                                                                          |    |    |   |   |                       |     |                                |     |      |      |
| <b>Risk and confounding factors</b>             |                                                                                          |    |    |   |   |                       |     |                                |     |      |      |
| <b>Socio-demographic *</b>                      | Age, Maternal age, Marital status, Household income, Education level                     |    |    |   |   | ●                     | ●   |                                |     |      |      |
| <b>Lifestyle *</b>                              | Smoking, Second-hand smoking, Drinking habits, Dietary status, Sleeping habits           |    |    |   |   | ●                     | ●   | ●                              | ●   | ●    | ●    |
| <b>Psychological and psychiatric</b>            | TAS-20                                                                                   |    |    |   |   | ●                     | ●   |                                |     |      |      |
|                                                 | POMS-SF                                                                                  |    |    |   |   | ●                     |     |                                |     |      |      |
|                                                 | Readiness of Parenthood Scale                                                            |    |    |   |   | ●                     | ●   | ●                              | ●   |      |      |
| <b>Obstetric *</b>                              | History of pregnancy, infertility treatment, prenatal diagnosis and gestational duration |    |    |   |   | ●                     |     |                                |     |      |      |
| <b>Biomonitoring data</b>                       | Urine, serum, umbilical cord blood                                                       |    |    |   |   |                       | ●   | ●                              |     |      |      |
| <b>Children</b>                                 |                                                                                          |    |    |   |   |                       |     |                                |     |      |      |
| <b>Risk and confounding factors</b>             |                                                                                          |    |    |   |   |                       |     |                                |     |      |      |
| <b>Demographic*</b>                             | Height, Weight, BMI, Sex                                                                 |    |    |   |   | ●                     | ●   | ●                              | ●   | ●    |      |
| <b>Behavioral</b>                               | Neonatal oral-motor assessment                                                           |    |    |   |   | ●                     |     | ●                              |     |      |      |
|                                                 | DCDQ                                                                                     |    |    |   |   | ●                     |     |                                | ●   |      | ●    |
| <b>Childcare*</b>                               | Breast feeding and weaning food status                                                   |    |    |   |   | ●                     |     |                                | ●   |      |      |
| <b>Psychological and psychiatric</b>            | Mary Rothbart's Temperament Questionnaires                                               |    |    |   |   | ●                     |     |                                |     |      |      |
|                                                 | · IBQ-R-SF                                                                               |    |    |   |   |                       |     |                                | ●   |      |      |
|                                                 | · ECBQ-SF                                                                                |    |    |   |   |                       |     |                                |     |      | ●    |
| <b>Biomonitoring data</b>                       | Urine extracted from disposable diapers                                                  |    |    |   |   |                       |     |                                |     | ●    | ●    |
| <b>Anthropometric data</b>                      | 2D:4D                                                                                    |    |    |   |   |                       |     |                                |     | ●    | ●    |
| <b>Outcome examples possibly to be analyzed</b> |                                                                                          |    |    |   |   |                       |     |                                |     |      |      |
| <b>LBW *</b>                                    |                                                                                          | ●  | ●  |   |   |                       |     | ●                              |     |      |      |
| <b>ASD *</b>                                    | ●                                                                                        | ●  | ●  | ● | ● |                       |     |                                |     | ●    |      |
| <b>ADHD *</b>                                   | ●                                                                                        | ●  | ●  | ● |   |                       |     |                                |     | ●    |      |

\*Refer to the Japan Environment and Children's Study (JECS)



1  
2  
3  
4 **BMI**, body mass index; **TAS-20**, the 20-item Toronto Alexithymia Scale; **POMS-SF**, Short form of the Profile of Mood States; **IBQ-R-SF**, The Infant Behavior Questionnaire  
5 Revised Short Form; **ECBQ-SF**, Early Childhood Behavior Questionnaire Short Form; **DCDQ**, Developmental Coordination Disorder Questionnaire, **2D:4D**, the second to  
6 fourth digit ratio; **PARS**, Pervasive Developmental Disorders Autism Society Japan Rating Scale; **ASD**, autism spectrum disorder; **ADHD**, attention deficit hyperactivity  
7 disorder; **LBW**, low birth weight; **<22 weeks**, Early pregnancy defined in the JECS is a gestational age of less than 22 weeks; **>=22 weeks**, Late pregnancy defined in the  
8 JECS is a gestational age of more than 22 weeks.  
9

10  
11 **Sub cohort A1**, Agreement on the adjunct questionnaire survey only; **Sub cohort A2**, Agreement on the adjunct questionnaire survey and provision of mother's  
12 biological specimen (urine); **Sub cohort A3**, Agreement on the adjunct questionnaire survey and provision of mother's biological specimen (urine) with gene analysis;  
13 **Sub cohort B**, Obtaining informed consent for provision of child's biological specimen from guardian (legally acceptable representatives); **Sub cohort C**, Obtaining  
14 informed consent for anthropometry measurement on child hands from guardian (legally acceptable representatives)  
15  
16  
17  
18  
19  
20  
21  
22  
23  
24  
25  
26  
27  
28  
29  
30  
31  
32  
33  
34  
35  
36  
37  
38  
39  
40  
41  
42  
43  
44  
45  
46  
47  
48  
49  
50  
51  
52  
53  
54  
55  
56  
57  
58  
59  
60

For peer review only

**Table 2** Comparison with national statistics in Aichi prefecture and JECS-A baseline data for pregnant women: verification of representativeness of the sample

|                                              | JECS-A baseline cohort of pregnant women (n = 5,721) | National statistics (Aichi pref.) |
|----------------------------------------------|------------------------------------------------------|-----------------------------------|
| <b>Pregnant women <sup>a</sup> (n)</b>       | 5721                                                 | 65218                             |
| <b>Age at Delivery <sup>a</sup></b>          |                                                      |                                   |
| 15-19 (%)                                    | 0.7                                                  | 1.3                               |
| 20-24                                        | 6.7                                                  | 8.2                               |
| 25-29                                        | 25.3                                                 | 28.3                              |
| 30-34                                        | 36.4                                                 | 36.6                              |
| 35-39                                        | 23.2                                                 | 21.4                              |
| 40-44                                        | 4.9                                                  | 4.2                               |
| 45-49                                        | 0.1                                                  | 0.1                               |
| 50-                                          | 0.0                                                  | 0.0                               |
| Missing (n)                                  | 157                                                  |                                   |
| <b>Education level <sup>b</sup> (n)</b>      |                                                      | 2397000                           |
| Junior high school/High school (%)           | 29.9                                                 | 47.2                              |
| College/Junior college/Technology college    | 35.3                                                 | 20.8                              |
| University                                   | 27.6                                                 | 28.4                              |
| Graduate school                              | 1.6                                                  | 3.6                               |
| Missing (n)                                  | 315                                                  |                                   |
| <b>Household income <sup>b c d</sup> (n)</b> |                                                      | 3018900                           |
| <2,000 (%)                                   | 2.4                                                  | 18.1                              |
| 2,000-<4,000                                 | 24.4                                                 | 26.7                              |
| 4,000-<6,000                                 | 33.1                                                 | 20.2                              |
| 6,000-<8,000                                 | 17.2                                                 | 13.4                              |
| 8,000-<10,000                                | 7.4                                                  | 8.3                               |
| ≥10,000                                      | 4.3                                                  | 5.0                               |
| Missing (n)                                  | 643                                                  |                                   |

<sup>a</sup> Data of Aichi prefecture as reference, provided by national vital statistics, Ministry of Health, Labour and Welfare in 2014.

<sup>b</sup> Data of Aichi prefecture provided by Ministry of Internal Affairs and Communications in 2012.

<sup>c</sup> Population of Aichi Prefecture including single-person households and families

<sup>d</sup> Household income shows thousand Japanese Yen(JPY), 110 JPY = 1US\$ as of 2017

1  
2  
3  
4  
5  
6  
7  
8  
9  
10  
11  
12  
13  
14  
15  
16  
17  
18  
19  
20  
21  
22  
23  
24  
25  
26  
27  
28  
29  
30  
31  
32  
33  
34  
35  
36  
37  
38  
39  
40  
41  
42  
43  
44  
45  
46  
47  
48  
49  
50  
51  
52  
53  
54  
55  
56  
57  
58  
59  
60

---

-: no available data provided; Household income shows thousand Japanese Yen(JPY), 110 JPY = 1US\$ as of 2017.

For peer review only

**Table 3** Comparison with national statistics in Aichi prefecture and JECS-A baseline data for children: verification of representativeness of the sample

|                                            | JECS-A baseline cohort of children (n = 5457) |        |        | National statistics (Aichi pref.) <sup>a</sup> |        |        |
|--------------------------------------------|-----------------------------------------------|--------|--------|------------------------------------------------|--------|--------|
|                                            | Total                                         | Male   | Female | Total                                          | Male   | Female |
| <b>Children (n)<sup>b</sup></b>            | 5457                                          | 2793   | 2659   | 65218                                          | 33649  | 31569  |
| <b>Sex (Singleton births)</b>              |                                               |        |        |                                                |        |        |
| (%)                                        | 99.9                                          | 51.2   | 48.7   |                                                | 51.6   | 48.4   |
| Missing (n)                                | 5                                             |        |        |                                                |        |        |
| <b>Birth weight, g (Singleton births)</b>  |                                               |        |        |                                                |        |        |
| Mean                                       | 3034.3                                        | 3076.1 | 2990.7 | 3000.0                                         | 3040.0 | 2950.0 |
| SD                                         | 427.0                                         | 439.8  | 408.6  | -                                              | -      | -      |
| Missing (n)                                | 43                                            | 23     | 16     |                                                |        |        |
| <b>Low birth weight (Singleton births)</b> |                                               |        |        |                                                |        |        |
| <2500 g (%)                                | 7.8                                           | 6.6    | 9.0    | 9.8                                            | 8.5    | 11.1   |
| Missing (n)                                | 43                                            | 23     | 16     |                                                |        |        |
| <b>Birth height, cm (Singleton births)</b> |                                               |        |        |                                                |        |        |
| Mean                                       | 49.7                                          | 49.9   | 49.5   | 49.3                                           | 49.6   | 49.1   |
| SD                                         | 2.3                                           | 2.4    | 2.1    | -                                              | -      | -      |
| Missing (n)                                | 51                                            | 28     | 19     |                                                |        |        |

<sup>a</sup> Data of Aichi prefecture as reference, provided by national vital statistics, Ministry of Health, Labour and Welfare in 2014.

<sup>b</sup> Multiple births (49 pairs of twins) were excluded.

-: no available data provided

**Table 4** Baseline characteristics of paired data of pregnant women and their children in the JECS-A cohort

|                                      | Sub-cohort |      |      |          |      |
|--------------------------------------|------------|------|------|----------|------|
|                                      | A1         | A2   | A3   | B        | C    |
| <b>Pregnant women (n)</b>            | 3426       | 2924 | 1753 | 118<br>7 | 1352 |
| <b>Age at Delivery</b>               |            |      |      |          |      |
| Mean                                 | 31.6       | 31.7 | 31.8 | 32.0     | 31.8 |
| SD                                   | 4.9        | 4.9  | 5.0  | 4.7      | 4.8  |
| Missing (n)                          | 44         | 14   | 7    | 0        | 0    |
| <b>Smoking habits</b>                |            |      |      |          |      |
| Never smoked (%)                     | 62.8       | 63.7 | 63.7 | 64.6     | 64.2 |
| Ex-smokers who quit before pregnancy | 21.6       | 22.0 | 23.1 | 23.1     | 21.8 |
| Smokers during early pregnancy       | 9.0        | 9.0  | 8.3  | 7.7      | 8.4  |
| Smokers                              | 2.5        | 2.5  | 2.1  | 2.2      | 2.8  |
| Missing (n)                          | 144        | 82   | 51   | 29       | 38   |
| <b>Second-hand smoking</b>           |            |      |      |          |      |
| Rarely (%)                           | 67.5       | 69.1 | 69.6 | 71.9     | 68.6 |
| A few days a week                    | 18.6       | 18.6 | 18.0 | 17.1     | 19.1 |
| Daily                                | 10.4       | 10.1 | 10.3 | 9.6      | 10.1 |
| Missing (n)                          | 124        | 66   | 36   | 17       | 30   |
| <b>Household income (JPY)</b>        |            |      |      |          |      |
| <2,000 (%)                           | 2.3        | 2.1  | 2.5  | 2.1      | 1.8  |
| 2,000-<4,000                         | 25.8       | 26.0 | 25.6 | 24.3     | 24.4 |
| 4,000-<6,000                         | 33.4       | 33.7 | 34.2 | 35.9     | 35.1 |
| 6,000-<8,000                         | 17.5       | 18.1 | 17.5 | 18.6     | 18.6 |
| 8,000-<10,000                        | 7.3        | 7.5  | 7.8  | 8.3      | 7.5  |
| ≥10,000                              | 4.5        | 4.7  | 4.5  | 4.5      | 3.9  |
| Missing (n)                          | 314        | 233  | 141  | 76       | 116  |

|                                            |            |            |            |            |            |
|--------------------------------------------|------------|------------|------------|------------|------------|
| <b>Children (n)<sup>a</sup></b>            | 3336       | 2884       | 1726       | 118<br>2   | 1346       |
| <b>Sex (Singleton births)</b>              |            |            |            |            |            |
| Male (%)                                   | 50.5       | 50.4       | 50.1       | 50.4       | 49.9       |
| Female                                     | 49.5       | 49.6       | 49.8       | 49.6       | 50.1       |
| Missing (n)                                | 1          | 1          | 1          | 0          | 0          |
| <b>Birth weight, g (Singleton births)</b>  |            |            |            |            |            |
| Mean                                       | 3041.<br>6 | 3052<br>.3 | 3054<br>.1 | 306<br>2.3 | 3039<br>.1 |
| SD                                         | 432.8      | 419.<br>9  | 430.<br>4  | 416.<br>7  | 410.<br>0  |
| Missing (n)                                | 22         | 15         | 9          | 7          | 4          |
| <b>Birth height, cm (Singleton births)</b> |            |            |            |            |            |
| Mean                                       | 49.6       | 49.7       | 49.7       | 49.7       | 49.7       |
| SD                                         | 2.3        | 2.2        | 2.2        | 2.1        | 2.1        |
| Missing (n)                                | 28         | 18         | 11         | 8          | 6          |

<sup>a</sup> Multiple births (twin pairs) were excluded; A1: 20 (n = 40), A2: 16 (n = 32), A3: 12 (n = 24), B: 5 (n = 10), and C: 6 (n = 12).

**Sub cohort A1**, Agreement on the adjunct questionnaire survey only; **Sub cohort A2**, Agreement on the adjunct questionnaire survey and provision of mother's biological specimen (blood and urine); **Sub cohort A3**, Agreement on the adjunct questionnaire survey and provision of mother's biological specimen (blood and urine) with genetic analysis; **Sub cohort B**, Obtaining informed consent for provision of child's biological specimen from guardian (legally acceptable representatives); **Sub cohort C**, Obtaining informed consent for anthropometry measurement on child hands from guardians (legally acceptable representatives). Household income shows thousand Japanese Yen (JPY), 110 JPY = 1 US\$ as of 2017

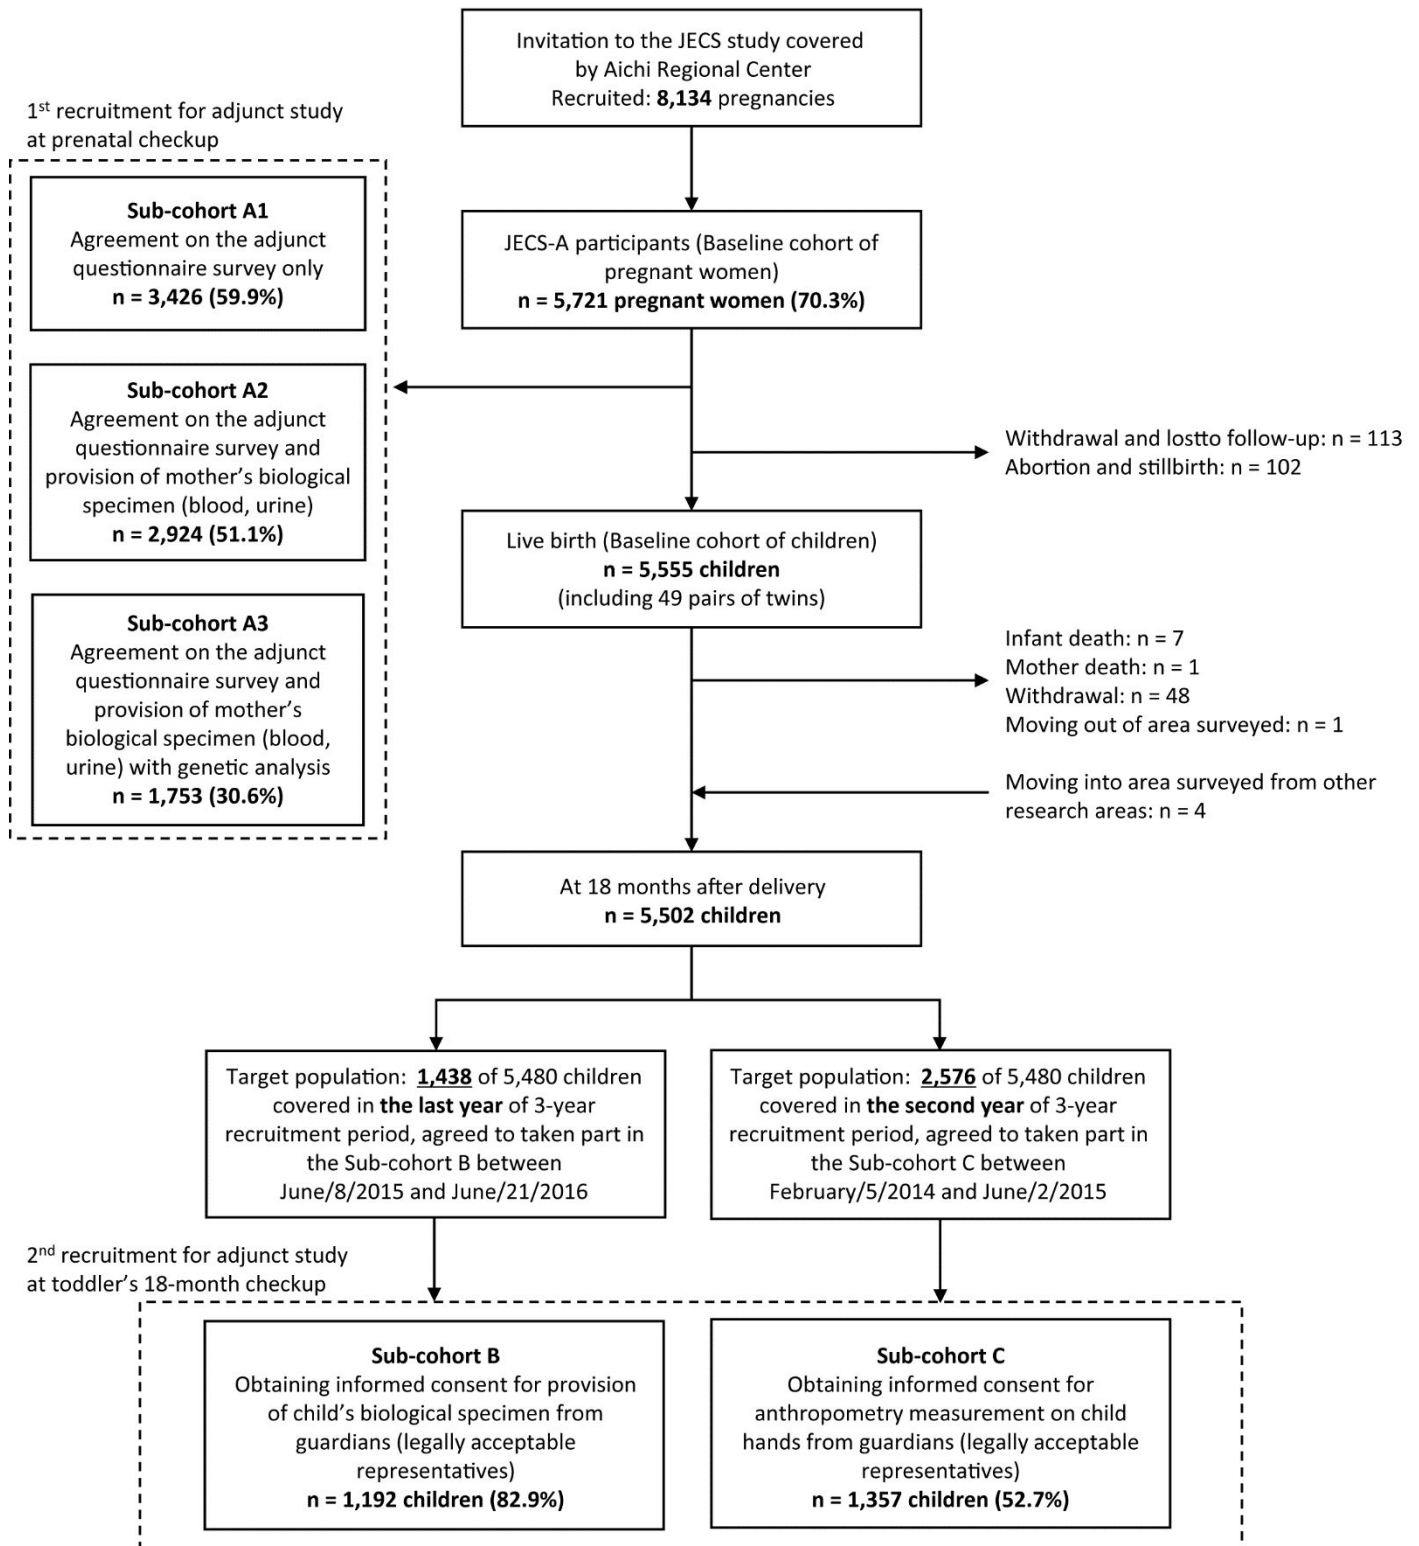

Figure 1. Flowchart showing each stage of study recruitment

# BMJ Open

## Cohort profile: Aichi regional sub-cohort of the Japan Environment and Children's Study (JECS-A)

|                               |                                                                                                                                                                                                                                                                                                                                                                                                                                                                                                                                                                                                                                                                                                                                                                                                                                                                                                                                                                                                                                                                                                                                                                                                                                                                                                                                                                                                                                                                                                                                                                                                                                                                                                                                                                                                                                                                                                                                                                                                                                                                                                                                                                                                                                                                                                                                                                                                                                                                                                                                                                                                                                                         |
|-------------------------------|---------------------------------------------------------------------------------------------------------------------------------------------------------------------------------------------------------------------------------------------------------------------------------------------------------------------------------------------------------------------------------------------------------------------------------------------------------------------------------------------------------------------------------------------------------------------------------------------------------------------------------------------------------------------------------------------------------------------------------------------------------------------------------------------------------------------------------------------------------------------------------------------------------------------------------------------------------------------------------------------------------------------------------------------------------------------------------------------------------------------------------------------------------------------------------------------------------------------------------------------------------------------------------------------------------------------------------------------------------------------------------------------------------------------------------------------------------------------------------------------------------------------------------------------------------------------------------------------------------------------------------------------------------------------------------------------------------------------------------------------------------------------------------------------------------------------------------------------------------------------------------------------------------------------------------------------------------------------------------------------------------------------------------------------------------------------------------------------------------------------------------------------------------------------------------------------------------------------------------------------------------------------------------------------------------------------------------------------------------------------------------------------------------------------------------------------------------------------------------------------------------------------------------------------------------------------------------------------------------------------------------------------------------|
| Journal:                      | <i>BMJ Open</i>                                                                                                                                                                                                                                                                                                                                                                                                                                                                                                                                                                                                                                                                                                                                                                                                                                                                                                                                                                                                                                                                                                                                                                                                                                                                                                                                                                                                                                                                                                                                                                                                                                                                                                                                                                                                                                                                                                                                                                                                                                                                                                                                                                                                                                                                                                                                                                                                                                                                                                                                                                                                                                         |
| Manuscript ID                 | bmjopen-2018-028105.R1                                                                                                                                                                                                                                                                                                                                                                                                                                                                                                                                                                                                                                                                                                                                                                                                                                                                                                                                                                                                                                                                                                                                                                                                                                                                                                                                                                                                                                                                                                                                                                                                                                                                                                                                                                                                                                                                                                                                                                                                                                                                                                                                                                                                                                                                                                                                                                                                                                                                                                                                                                                                                                  |
| Article Type:                 | Cohort profile                                                                                                                                                                                                                                                                                                                                                                                                                                                                                                                                                                                                                                                                                                                                                                                                                                                                                                                                                                                                                                                                                                                                                                                                                                                                                                                                                                                                                                                                                                                                                                                                                                                                                                                                                                                                                                                                                                                                                                                                                                                                                                                                                                                                                                                                                                                                                                                                                                                                                                                                                                                                                                          |
| Date Submitted by the Author: | 29-May-2019                                                                                                                                                                                                                                                                                                                                                                                                                                                                                                                                                                                                                                                                                                                                                                                                                                                                                                                                                                                                                                                                                                                                                                                                                                                                                                                                                                                                                                                                                                                                                                                                                                                                                                                                                                                                                                                                                                                                                                                                                                                                                                                                                                                                                                                                                                                                                                                                                                                                                                                                                                                                                                             |
| Complete List of Authors:     | <p>Ebara, Takeshi; Nagoya City University, Occupational and Environmental Health, Graduate school of Medical Sciences</p> <p>Yamada, Yasuyuki; Nagoya City University Graduate School of Medical Sciences and Medical School, Department of Occupational and Environmental Health; Juntendo University School of Health and Sports Science Graduate School of Health and Sports Science</p> <p>Shoji, Naoto; Nagoya City University Graduate School of Medical Sciences and Medical School, Department of Occupational and Environmental Health; Asahi University, School of Health Sciences</p> <p>Ito, Yuki; Nagoya City University Graduate School of Medical Sciences and Medical School, Department of Occupational and Environmental Health</p> <p>Nakagawa, Atsuko; Nagoya City University Faculty of Humanities and Social Sciences Graduate School of Humanities and Social Sciences</p> <p>Miyachi, Taishi; Nagoya City University Graduate School of Medical Sciences and Medical School, Pediatrics and Neonatology; Nagoya West District Care Center for Disabled Children</p> <p>Ozaki, Yasuhiko; Nagoya City University Graduate School of Medical Sciences and Medical School, Obstetrics and Gynecology</p> <p>Omori, Toyonori; Nagoya City University Graduate School of Medical Sciences and Medical School, Health Care Policy and Management</p> <p>Suzuki, Sadao; Nagoya City University Graduate School of Medical Sciences, Department of Public Health</p> <p>Kojima, Masayo ; Nagoya City University Graduate School of Medical Sciences and Medical School, Medical Education</p> <p>Ueyama, Jun; Nagoya University Graduate School of Medicine Faculty of Medicine, Department of Pathophysiological Laboratory Sciences, Field of Radiological and Medical Laboratory Sciences</p> <p>Tomizawa, Motohiro; Nagoya City University Graduate School of Medical Sciences and Medical School, Department of Occupational and Environmental Health; Tokyo University of Agriculture</p> <p>Kato, Sayaka; Nagoya City University Graduate School of Medical Sciences and Medical School, Department of Occupational and Environmental Health; Nagoya City University Graduate School of Medical Sciences and Medical School, Pediatrics and Neonatology</p> <p>Oguri, Tomoko; Nagoya City University Graduate School of Medical Sciences and Medical School, Department of Occupational and Environmental Health; National Institute of Advanced Industrial Science and Technology (AIST)</p> <p>Matsuki, Taro; Nagoya City University Graduate School of Medical Sciences and Medical School, Department of Occupational and</p> |



|                                 |                                                                                                                                                                                                                                                                                                                                                                                                                                                                                                                                                                                                                                                                                                                                      |
|---------------------------------|--------------------------------------------------------------------------------------------------------------------------------------------------------------------------------------------------------------------------------------------------------------------------------------------------------------------------------------------------------------------------------------------------------------------------------------------------------------------------------------------------------------------------------------------------------------------------------------------------------------------------------------------------------------------------------------------------------------------------------------|
|                                 | Environmental Health<br>Sato, Hirotaka; Nagoya City University Graduate School of Medical Sciences and Medical School, Department of Occupational and Environmental Health<br>Oya, Naoko; Nagoya City University Graduate School of Medical Sciences and Medical School, Department of Occupational and Environmental Health<br>Sugiura-Ogasawara , M; Nagoya City University Graduate School of Medical Sciences and Medical School, Obstetrics and Gynecology<br>Saitoh, Shinji; Nagoya City University Graduate School of Medical Sciences and Medical School, Pediatrics and Neonatology<br>Kamijima, Michihiro; Nagoya City University Graduate School of Medical Sciences, Department of Occupational and Environmental Health |
| <b>Primary Subject Heading</b>: | Epidemiology                                                                                                                                                                                                                                                                                                                                                                                                                                                                                                                                                                                                                                                                                                                         |
| Secondary Subject Heading:      | Epidemiology, Paediatrics                                                                                                                                                                                                                                                                                                                                                                                                                                                                                                                                                                                                                                                                                                            |
| Keywords:                       | JECS, birth cohort, EPIDEMIOLOGY, JECS-A                                                                                                                                                                                                                                                                                                                                                                                                                                                                                                                                                                                                                                                                                             |
|                                 |                                                                                                                                                                                                                                                                                                                                                                                                                                                                                                                                                                                                                                                                                                                                      |

SCHOLARONE™  
Manuscripts

## Cohort profile: Aichi regional sub-cohort of the Japan Environment and Children's

### Study (JECS-A)

Takeshi Ebara<sup>1</sup>, Yasuyuki Yamada<sup>1,9</sup>, Naoto Shoji<sup>1,10</sup>, Yuki Ito<sup>1</sup>, Atsuko Nakagawa<sup>7</sup>, Taishi Miyachi<sup>2,11</sup>, Yasuhiko Ozaki<sup>3</sup>, Toyonori Omori<sup>4</sup>, Sadao Suzuki<sup>5</sup>, Masayo Kojima<sup>6</sup>, Jun Ueyama<sup>8</sup>, Motohiro Tomizawa<sup>1†</sup>, Sayaka Kato<sup>1,2</sup>, Tomoko Oguri<sup>1††</sup>, Taro Matsuki<sup>1</sup>, Hirotaka Sato<sup>1</sup>, Naoko Oya<sup>1</sup>, Mayumi Sugiura-Ogasawara<sup>3</sup>, Shinji Saitoh<sup>2</sup>, Michihiro Kamijima<sup>1</sup>

Department of <sup>1</sup>Occupational and Environmental Health, <sup>2</sup>Pediatrics and Neonatology, <sup>3</sup>Obstetrics and Gynecology, <sup>4</sup>Health Care Policy and Management, <sup>5</sup>Public Health, <sup>6</sup>Medical Education, Nagoya City University, Graduate School of Medical Sciences, Nagoya, Japan

<sup>7</sup>School of Humanities and Social Sciences, Nagoya City University, Nagoya, Japan

<sup>8</sup>Department of Pathophysiological Laboratory Sciences, Field of Radiological and Medical Laboratory Sciences, Nagoya University Graduate School of Medicine, Japan.

<sup>9</sup>Juntendo University Graduate School of Health and Sports Science, Chiba, Japan

<sup>10</sup> Asahi University, School of Health Sciences

<sup>11</sup>Nagoya West District Care Center for Disabled Children, Nagoya, Japan

Present affiliation: †Tokyo University of Agriculture, ††National Institute of Advanced Industrial Science and Technology (AIST)

Corresponding Author:

Takeshi Ebara, PhD.

Department of Occupational and Environmental Health, Nagoya City University, Graduate School of Medical Sciences. Mizuho-ku, Nagoya, 4678601, Japan

TEL: 81-52-853-8171 FAX: 81-52-859-1228

e-mail: ebara@med.nagoya-cu.ac.jp

**ABSTRACT**

**Purpose:** Effects of fetal, perinatal and childhood environment on the health of children at birth and during later life have become a topic of concern. The Aichi regional sub-cohort of the Japan Environment and Children's Study (JECS-A) is an ongoing birth cohort of pregnant women and their children that has been used to provide unique data, as adjunct studies of JECS, on multifaceted potential factors affecting children's health.

**Participants:** The JECS-A is part of the Japan Environment and Children's Study (JECS) which follows a total of 100,000 pairs of children and their mothers (fathers' participation is optional) across 15 regions in Japan. In JECS-A, of the 8,134 pregnant women living in Ichinomiya City and Nagoya City, Japan, a total of 5,721 pregnant women and their 5,555 children were included. Sociodemographic and psychological data as well as biological specimens were collected from the pregnant women and their spouses (if available) in the cohort during their pregnancy. Information on children included in the JECS-A was collected from their mothers and includes demographic, behavioral, childcare, psychological and psychiatric data. Urine extracted from disposable diapers and anthropometric data were also obtained from the children.

**Findings to date:** A similar distribution trend for age at delivery was confirmed between the pregnant women enrolled in the JECS-A and the national statistics of the relevant areas. However, differences in education level and household income were observed. A total of 5,502 children remained in the cohort at 18 months after delivery. Compared with the national statistics, the basic demographics of the children in the cohort represented the population in the study areas.

**Future plans:** The enrolled children in the JECS-A will be followed until the age of 13 years. The studies that come from JECS-A will complement JECS and bring novel results with a high level of generalizability.

(300 words)

1  
2  
3  
4  
5 **Strengths and limitations of this study**

- 6  
7  
8  
9  
10  
11  
12  
13  
14  
15  
16  
17  
18  
19  
20  
21  
22  
23  
24  
25  
26  
27  
28  
29  
30  
31  
32  
33  
34  
35  
36  
37  
38  
39  
40  
41  
42  
43  
44  
45  
46  
47  
48  
49  
50  
51  
52  
53  
54  
55  
56  
57  
58  
59  
60
- The main strength of the J ECS-A of children is its large sample size, reflecting a representative population.
  - Another strength can be found in considering multifaceted potential factors affecting children's health in the prospective birth cohort over two generations.
  - The main limitation of the cohort is that the population with low-income households is not included.

For peer review only

## INTRODUCTION

The effects of fetal, perinatal and childhood environmental factors on the health of children at birth and during later life are a topic of concern. A number of birth cohort studies have thus been conducted worldwide to address this issue, and the Japan Environment and Children's Study (JECS), which focuses on the effects of environmental chemical pollutants, is one of the largest. The JECS was launched in 2011 by the Ministry of the Environment, Japan, after 3 years of planning.<sup>1</sup> The JECS consists of nationwide regional sub-cohorts that can be used to conduct studies, so called as adjunct studies of JECS, which are independent of the main study of the JECS. This article describes the cohort profile of a regional sub-cohort of the JECS, the Aichi regional sub-cohort of the JECS (JECS-A), containing 5,721 pregnant women and their 5,555 children. The following research themes are the main focuses of the adjunct studies conducted in JECS-A.

The first one is neurodevelopmental disorders<sup>2</sup> including intellectual disability, communication disorders, autism spectrum disorder (ASD), attention deficit hyperactivity disorder (ADHD), specific learning disorder, and motor disorders. A review has indicated that the estimated prevalence of ASD in Asia before 1980 was around 1.9/10,000, but this figure has recently increased by ten times.<sup>3</sup> Though a previous study conducted in Denmark claimed that 33% of the increase in the prevalence of ASD in recent years can be accounted for by changes in the diagnostic criteria and reporting methods,<sup>4</sup> this increased prevalence remains a complex and highly controversial issue that needs to be addressed. Recent epidemiological studies have linked neurodevelopmental outcomes to prenatal exposure to environmental toxicants such as heavy metals,<sup>5,6</sup> prenatal tobacco exposure,<sup>7,8</sup> environmental tobacco exposure,<sup>9,10</sup> phthalates,<sup>11</sup> persistent organic pollutants,<sup>12,13</sup> and organophosphate pesticides (OPs).<sup>14,15</sup> Furthermore, interest is growing regarding the potential role of social

1  
2  
3  
4 stressors in modifying the relationship between the above early childhood exposure and the  
5  
6 neurodevelopmental outcomes. A cohort study of seven-year-old predominantly Mexican  
7  
8 American children in California's Salinas Valley suggested that social adversities including a  
9  
10 poor learning environment and parent-child interactions were significantly associated with a  
11  
12 moderate decrease in the intelligence quotient (IQ) score and its subset scores.<sup>17</sup> Several  
13  
14 recent studies have also discussed the effects of parent-child interactions, focusing on the  
15  
16 effects of alexithymia in mothers<sup>18</sup> and of depressive symptoms on parenting stress.<sup>19</sup> Thus,  
17  
18 there is the need to investigate postnatal influences, such as the effects of interactions  
19  
20 between mothers and their children, as well as prenatal and postnatal toxicant exposures on  
21  
22 the neurodevelopment of children. The above research questions will be addressed to  
23  
24 complement those of the main study of the JECS.  
25  
26  
27  
28  
29

30  
31 The second theme of the adjunct studies conducted in JECS-A is the exposure assessments  
32  
33 using urine collected during early childhood when the central nervous system develops  
34  
35 rapidly. So far, the amount of exposure to environmental chemical substances taken into the  
36  
37 bodies of infants has rarely been investigated because most infants wear diapers that fully  
38  
39 absorb all urine. Noninvasive biomonitoring using urine samples is thus required especially  
40  
41 for exposure assessments of chemicals with short biological half lives, and a methodology  
42  
43 for extracting urine from used disposable diapers has been investigated in our previous  
44  
45 studies.<sup>20 21</sup> Since the urine during early childhood was not collected in the main study of the  
46  
47 JECS, the adjunct studies using such urine in JECS-A will address research questions  
48  
49 regarding environmental exposure in that period.  
50  
51  
52  
53

54  
55 The third theme of the adjunct studies is the investigation of objective screening tools to  
56  
57 detect neurodevelopmental disorders at earlier stages. Public health services in local  
58  
59 communities must be capable of providing early intervention support for children with such  
60

1  
2  
3  
4 disorders. Preventive screening during early childhood can help to minimize later difficulties  
5  
6 and to improve the trajectory of subjects with neurodevelopmental disorders in later life. For  
7  
8 example, a validated screening checklist for autism at the age of 2 years, called  
9  
10 M-CHAT-R/F,<sup>22</sup> is available as part of early medical checkups, but this screening protocol  
11  
12 requires a 2-step screening test that must be conducted by a physician. As a secondary tool  
13  
14 allowing easy and objective screening the second to fourth digit (2D:4D) ratio, which is  
15  
16 defined as the proportion between the lengths of the index and ring fingers, might be useful.  
17  
18 A previous study suggested that autistic children aged 2 to 14 years have a smaller 2D:4D  
19  
20 ratio than normal children of the same generation.<sup>23</sup> Recent studies<sup>24 25</sup> have also investigated  
21  
22 whether the 2D:4D ratio, a controversial but commonly used proxy marker of prenatal  
23  
24 androgen concentrations based on the extreme male brain theory, is associated with ASD.  
25  
26 However, this hypothetical screening method needs further scientific evidence in different  
27  
28 epidemiological settings in different part of the globe. Another recent trial aiming to early  
29  
30 intervention for neurodevelopmental problems can be found in neonatal oral-motor  
31  
32 assessments, such as sucking behavior. While contradictory findings have been obtained,<sup>26</sup> a  
33  
34 recent longitudinal study also showed interesting evidence that some sucking behaviors in  
35  
36 preterm infants are associated with later abnormal neurodevelopmental outcomes at the age  
37  
38 of 2 years.<sup>27</sup> As such, further research on the development of screening tools for early  
39  
40 intervention is needed.

41  
42  
43  
44  
45  
46  
47  
48  
49 The JECS-A was established in 2011 as a sub-cohort of the JECS and has three main  
50  
51 objectives: (1) to clarify the effects of prenatal and postnatal chemical exposures and social  
52  
53 stressors on pregnant women and/or their children, especially neurodevelopmental outcomes  
54  
55 of the children; (2) to develop a biomonitoring method using urine samples extracted from  
56  
57 diapers for measuring internal exposure to chemical substances; and (3) to develop secondary  
58  
59  
60

1  
2  
3  
4 tools such as the 2D:4D ratio or neonatal oral-motor assessments to screen future  
5  
6 neurodevelopmental problems at earlier stages of childhood. This article outlines the JECS-A  
7  
8 and its baseline data to date.  
9

## 10 11 12 13 **COHORT DESCRIPTION**

### 14 15 16 **Setting**

17  
18 The JECS is an ongoing nationwide birth cohort study with a total of 100,000 children and  
19  
20 their parents (father's participation is optional, but suggested) across 15 regions in Japan.<sup>28 29</sup>  
21  
22  
23 <sup>30</sup> To identify risk factors in the environment affecting children's growth and health, the  
24  
25 participating children are being followed from their fetal stage until the age of 13 years. The  
26  
27 JECS has 15 regional sub-cohorts. At Aichi Regional Center of the JECS, an  
28  
29 interdisciplinary team composed of toxicologists, psychologists, epidemiologists, public  
30  
31 health specialists, pediatricians, obstetricians and gynecologists, biostatisticians, and  
32  
33 ergonomists designed the JECS-A as part of the JECS cohort. The study areas (**Figure 1**)  
34  
35 covered by the Aichi Regional Center of the JECS consist of Ichinomiya City (population of  
36  
37 387,000 in 2012) and Kita-ward in Nagoya City (population of 165,000 in 2012). Nagoya  
38  
39 City consists of 16 wards with a population of over 2 million and is Japan's third largest  
40  
41 industrial metropolis, next to Tokyo and Osaka. Kita-ward is in the northern part of Nagoya  
42  
43 City. Ichinomiya City neighbors Nagoya City and traditionally was known as an area  
44  
45 involved in textile production but is now a regional commercial and residential area with a  
46  
47 mixed economy of manufacturing and agriculture. Both areas are relatively urban and widely  
48  
49 known in the automobile and ceramics industries.  
50  
51  
52  
53  
54  
55

### 56 57 **Enrollment strategy**

58  
59 **Figure 2** shows a flowchart depicting each stage of study recruitment. A  
60



1  
2  
3  
4 community-based recruitment strategy was adopted at designated 32 obstetric facilities  
5  
6 including hospitals, clinics or midwifery units providing medical care for pregnant women in  
7  
8 the study areas. The participants living in the areas can reach any of the 32 facilities within  
9  
10 30 minutes by car or public transportation such as subway or train. Women in the early stage  
11  
12 of pregnancy who visited an obstetrics facility for prenatal health care were invited to  
13  
14 participate in the JECS if they met the following criteria: (1) residence within the study  
15  
16 areas, (2) an estimated delivery date after August 2011, and (3) an ability to read and write  
17  
18 the Japanese language so as to complete the self-administered questionnaire. In addition to  
19  
20 this recruitment, we asked public health centers of the local governments to help us approach  
21  
22 hard-to-reach groups such as low socio-economic status (SES) or reluctant pregnant women.  
23  
24 All pregnant women receive the Maternal and Child Health Handbook at the public health  
25  
26 centers to get complimentary municipal maternal care for pregnancy, delivery, and childcare  
27  
28 under the Maternal and Child Health Law in Japan. Taking advantages of the occasions  
29  
30 enabling face-to-face communication with all pregnant women in the study area, our staffs  
31  
32 carefully explained the importance of the JECS to them and requested their cooperation for  
33  
34 the study at the obstetric facilities.  
35  
36  
37  
38  
39  
40  
41

42  
43 Of the 8,134 pregnant women who were invited as eligible recruits during the recruitment  
44  
45 period from January 2011 to March 2014, a total of 5,721 (70.3%) participants from  
46  
47 cooperating 32 obstetrics facilities were enrolled as the baseline regional cohort of pregnant  
48  
49 women for main study of the JECS. The study area has 4,400 pregnant women annually on  
50  
51 average, suggesting that 5,721 participants accounted for about 40% of the target population  
52  
53 in the area.  
54  
55

56  
57 After the recruitment to the main study of the JECS, the registered 5,721 JECS participants  
58  
59 were also invited to participate in adjunct studies conducted solely in the JECS-A and asked  
60

1  
2  
3  
4 if they could provide any of the following three types of consent: agreement to complete the  
5  
6 adjunct questionnaire survey only (Sub-cohort A1, n = 3,426), agreement to provide maternal  
7  
8 biological specimens in addition to agreeing to participate in Sub-cohort A1 (Sub-cohort A2,  
9  
10 n = 2,924), and agreement to undergo genetic analyses in addition to agreeing to participate  
11  
12 in Sub-cohorts A1 and A2 (Sub-cohort A3, n = 1,753). Sub-cohorts A1, A2 and A3 were  
13  
14 designed as a hierarchy, that is, the participants in sub-cohort A3 agreed to participate in  
15  
16 studies conducted in sub-cohorts A1 and A2. Each participant in the adjunct studies gave  
17  
18 written informed consent before any surveys began.  
19  
20  
21  
22

23 Adjunct questionnaires for Sub-cohort A1 were distributed three times at the obstetric  
24  
25 facilities during 1st and 2nd/3rd trimesters, in principle, and one month after the delivery,  
26  
27 and mailed thereafter. Selective attrition caused by low SES may result in the estimates of  
28  
29 findings being biased <sup>31</sup>, so that enrollment and retention strategies play an important role in  
30  
31 longitudinal cohort studies. We sent 1,000 Japanese yen (JPY, 110 JPY = 1US\$ as of 2019)  
32  
33 worth of a prepaid card for every adjunct mail survey as monetary incentive to respondents.  
34  
35 The prepaid card called 'Quo card' is familiar and can be used at all kinds of restaurants,  
36  
37 convenience stores, gas stations, bookstores etc. in Japan. In addition to the monetary  
38  
39 incentives to participate, we also conducted reminder calls or letters to retain participants  
40  
41 who were likely to drop out of the study, focusing on non-respondents of the postal surveys.  
42  
43  
44  
45  
46

47 In Sub-cohorts A2 and A3, the parental blood (up to 1.5 ml) and urine (up to 50 ml,  
48  
49 mothers only) during 1st and 2nd/3rd trimesters in principle and the cord blood (up to 1.5 ml)  
50  
51 were collected and stored at around -80 °C. Participants in the JECS-A were then followed  
52  
53 regardless of whether or not they took part in the above adjunct studies. Subsequently, of the  
54  
55 5,555 children, including 49 pairs of twins, born from the enrolled mothers, 57 children  
56  
57 dropped out of the JECS-A because of infant death (n = 7), mother death (n = 1), withdrawal  
58  
59  
60

1  
2  
3  
4 of consent (n = 48), or a change in residence to an area outside the surveyed area (n = 1). On  
5  
6 the other hand, 4 children who moved into the surveyed area from another one were included.  
7  
8 As of 18 months after delivery, a total of 5,502 children remained within the JECS-A,  
9  
10 accounting for approximately 40% of the children born in the study area.  
11  
12

13  
14 A second recruitment for the adjunct studies in the JECS-A was also conducted during the  
15  
16 follow-up of the study participants of the main study of the JECS, focusing on children. We  
17  
18 approached the guardians of targeted children at legal check-ups for 18-month-olds provided  
19  
20 at regional public health centers and health consultation centers. The recruitment period was  
21  
22 divided into two phases. Of the 5,502 children remaining in the JECS-A at 18 months of age,  
23  
24 a total of 2,576 children had reached the age until June 2015. We conducted a survey of the  
25  
26 anthropometric measurements of the 2D:4D ratio of the children on both hands (Sub-cohort  
27  
28 B). A total of 1,357 children (coverage of target samples: 52.7%, consent rate: 99.0%) were  
29  
30 enrolled in Sub-cohort B. Subsequent to this recruitment, another recruitment was also set for  
31  
32 18-month-old children born from mothers registered during the last year of the pregnant  
33  
34 women recruitment (Sub-cohort C). This cohort was specifically planned to collect biological  
35  
36 samples (mainly overnight urine) from diapers, and written informed consent for the adjunct  
37  
38 survey was obtained from 1,192 children (82.9%). All the enrolled children had reached the  
39  
40 age of 1.5 years as of June 2016. The follow-up schedule for children beyond the age of 3  
41  
42 years has yet to be finalized, but these sub-cohorts within the JECS-A will be followed until  
43  
44 the children reach the age of 13 years. Informed parental consent from the legally authorized  
45  
46 representative was obtained for all the enrollment of children in the studies. Note that the  
47  
48 above figures were based on the data set jecs-ag-20160424, which was released in June 2016,  
49  
50 and on the provisional data set determined as of August 1, 2018.  
51  
52  
53  
54  
55  
56  
57  
58  
59  
60

## Patient and Public Involvement

To develop the JECS-A cohort, we have established a system for public involvement in research, organizing an annual advisory committee consisting of the representatives from local government, medical association, nursing association, women's group, lawyers and mass media. The role of the committee offers advice and research questions from public concern, as members of an external project supporting group. Moreover, the committee has great contribution not only to sharing knowledge or engaging and creating a dialogue with the public, but also to playing a valuable role in advising on recruitment of participants and suggesting ideas for conducting the research. We also have held an open lecture for the participants every year since 2012, as an opportunity in which information and knowledge about the research is provided and disseminated.

## Data collection and measurements for adjunct studies of the JECS-A

The data collected for the adjunct studies in the JECS-A are summarized in **Table 1**. Data acquisition for some socio-demographics and neurodevelopmental outcomes was planned within the main study of the JECS.

Each of sub-cohorts in JECS-A was designed for the three main objectives as stated in the Introduction. First, to challenge the multifaceted problems surrounding children's development, Sub-cohort A1 was formed with the intention of collecting data on longitudinal changes in prenatal and postnatal exposures considered to affect neurodevelopmental outcomes. One of our special concerns is the effect of alexithymia in mothers on early child development. The 20-item Toronto Alexithymia Scale (TAS-20)<sup>32</sup> will be used to measure this trait as a primary factor, and studies will investigate the pregnancy and perinatal outcomes and/or the developmental outcomes of postnatal infants. As there are many

1  
2  
3  
4 potential determinants extending from the prenatal to early childhood period, the risks will  
5  
6 be estimated using the mother's and child's demographic variables or other related factors as  
7  
8 confounding factors. Sub-cohorts A2 and A3 will mainly focus on studies using biological  
9  
10 specimens (urine and/or blood) obtained from pregnant women and their spouses when  
11  
12 available. These biological samples will be used for exposure assessments, genetic and  
13  
14 epigenetic analyses, and activity determinations of chemical metabolism-related enzymes,  
15  
16 and so on. Data on the levels of urinary exposure biomarkers including chemical metabolites  
17  
18 will be combined with those in sub-cohort C and, eventually, the longitudinal exposure  
19  
20 trajectory and the relationships between exposure and health outcomes will also be analyzed.  
21  
22 Second, Sub-cohort C was designed to clarify the chemical exposure levels in toddlers. To  
23  
24 estimate their amount of exposure to environmental chemicals, a noninvasive biomonitoring  
25  
26 approach was adopted in which a paper diaper worn overnight was collected under  
27  
28 refrigerated conditions at the age of 18 and 36 months. This cohort will also be used to  
29  
30 derive human biomonitoring reference values (e.g., RV95) of urinary chemical  
31  
32 concentrations in the Japanese children.  
33  
34  
35  
36  
37  
38  
39

40 Third, sub-cohort B was designed to develop secondary tools such as the 2D:4D ratio or  
41  
42 neonatal oral-motor assessments to screen future neurodevelopmental problems at earlier  
43  
44 stages of childhood. One of our major interest is the lengths of digits on both hands in  
45  
46 children especially the longitudinal changes in 2D:4D ratios between 18-month-old and  
47  
48 36-month-old infants. As for the anthropometric measurements of the palms and digits of the  
49  
50 children's hands, we have established a specialized protocol involving photographic records  
51  
52 and digit measurements that has a high reliability (Intra/Inter-Class Correlations:  $ICC_1 = 0.97$   
53  
54 [95% CI, 0.87-0.99],  $ICC_3 = 0.93$  [0.83-0.98]). In short, our easy-to-use photocopying  
55  
56 method, which involves placing the child's palm on a box composed of transparent acrylic  
57  
58  
59  
60

1  
2  
3  
4 thin plates and photographing it with a digital camera fixed inside the box, was devised for  
5  
6 application in health checkup settings enforced by law. All the 2D:4D ratio data will be  
7  
8 obtained using this protocol. Sub-cohort A1 will also be used to examine the relationship  
9  
10 between neonatal oral-motor assessments and subsequent abnormal neurodevelopmental  
11  
12 outcomes. Using the short version of Infant Behavior Questionnaire (IBQ) and Early  
13  
14 Childhood Behavior Questionnaire (ECBQ) as factors reflecting temperamental  
15  
16 self-regulation, the utility of such assessments as early screening tools for predicting  
17  
18 subsequent neurodevelopmental outcomes will be verified.  
19  
20  
21

22  
23 The JECS-A do not include any information regarding medical diagnoses affecting  
24  
25 neurodevelopmental outcomes at this time, but such information will be available in the  
26  
27 future through the main study of the JECS, which is being conducted under the same protocol  
28  
29 across 15 regions in Japan.  
30  
31  
32

## 33 34 35 **FINDINGS TO DATE**

### 36 37 **Participant characteristics of pregnant women**

38  
39 **Table 2** shows the main socio-demographic characteristics of the pregnant women. To  
40  
41 ascertain whether the JECS-A baseline profiles are representative of the pregnant women in  
42  
43 the study areas in general, the national statistics for Aichi prefecture including Nagoya City  
44  
45 and Ichinomiya City (since data for each city were not available) were included in the table.  
46  
47 Similar distribution trends for variables such as “Age at delivery” were confirmed when the  
48  
49 JECS-A baseline cohort of pregnant women and the national statistics were compared;  
50  
51 however, differences in “Education level” and “Household income” were observed.  
52  
53 Regarding education level, the percentage of JECS participants who had graduated from high  
54  
55 school was relatively low, compared with the national statistics (25.1% vs. 39.7%), while the  
56  
57  
58  
59  
60

1  
2  
3  
4 percentage of college/junior college/technology college students was higher among the JECS  
5  
6 participants, compared with the national statistics (35.3% vs. 20.8%). Moreover, the number  
7  
8 of JECS-A participants with a household income of 2 million yen or less was about 1/8 of the  
9  
10 national statistics. Likewise, unemployed participants (mainly housewives) accounted for  
11  
12 45% of the JECS-A cohort. These results suggest a possible selection bias. We recruited  
13  
14 pregnant women who had visited the obstetric facilities during the daytime; this might have  
15  
16 resulted in a lower study participation rate among pregnant employees.  
17  
18  
19  
20  
21  
22

### 23 **Participant characteristics of children**

24  
25 As for the baseline cohort of children, a total of 5,502 (99.0%) of the 5,555 children  
26  
27 remained in the JECS-A at 18 months after delivery (provisional figures as of August 1,  
28  
29 2018). **Table 3** compares the baseline data of the newborns with the national statistics. Basic  
30  
31 demographics including “Sex”, “Birth weight” and “Birth height” had similar distributions,  
32  
33 indicating the representativeness of the sample.  
34  
35  
36

37 Similarly, **Table 4** shows the fundamental characteristics of the pregnant women and their  
38  
39 children in each sub-cohort of the JECS-A. No notable differences in the descriptive  
40  
41 statistics were observed among the sub-cohorts. Furthermore, the drop-out rates for each  
42  
43 sub-cohort, to date, have been maintained at less than 10% relative to the baseline. However,  
44  
45 10% of the sub-cohort values for household income are missing because many participants  
46  
47 did not provide information on the income. Therefore, caution is needed when using this  
48  
49 variable as a confounding factor in multiple regression analyses.  
50  
51  
52  
53  
54  
55  
56

## 57 **STRENGTHS AND LIMITATIONS**

58  
59  
60

1  
2  
3  
4 The main strength of the JECS-A of children is its large sample size, reflecting a  
5  
6 representative population. Approximately 40% of the children born in the study area have  
7  
8 been included in the study to date. The participating children will be followed until they  
9  
10 reach the age of 13 years. The study protocol<sup>33</sup> of the JECS decided on a target retention rate  
11  
12 of 80% or higher at the age of 13 years. The linkage between the JECS-A sub-cohort and the  
13  
14 main data of the JECS study will further allow novel and challenging studies with a high  
15  
16 generalizability.  
17  
18  
19

20  
21 The main weakness of the JECS-A cohort concerns the pregnant women participants  
22  
23 related to a selective attrition. A relatively large proportion of single-income, middle-class  
24  
25 households were included in the JECS-A; many low-income households refused to  
26  
27 participate in the surveys, and some participants did not provide information concerning their  
28  
29 household income. As enrollment strategies, though we set about recruiting from the first  
30  
31 trimester of pregnancy (<12-week gestation), it was hard to get their cooperation in earlier  
32  
33 weeks of a pregnancy, when the risk of miscarriage is higher. Most of pregnant women  
34  
35 registered were actually after 10th week of pregnancy. Furthermore, we had no choice but to  
36  
37 call on pregnant women for participation who had visited the obstetric facilities mainly  
38  
39 during the daytime, owing to limited number of staffs during the evening shift at hospitals.  
40  
41 Employed participants including all non-regular employees (part-time, temporary or contract  
42  
43 employees) only accounted for 33% in the group of annual household income with 2 million  
44  
45 Japanese yen or less. This means a selective attrition that working pregnant women of low  
46  
47 SES might have been excluded in the cohorts. Such family socioeconomic status will have  
48  
49 possibilities affecting several outcomes related to child development such as breastfeeding  
50  
51 duration <sup>34</sup>, obesity in children <sup>35</sup> and child maltreatment <sup>36</sup>. A British study <sup>37</sup>, however,  
52  
53 suggests that cognitive and behavioural development has a weak or absent direct effect of  
54  
55  
56  
57  
58  
59  
60



1  
2  
3  
4 income inequality after controlling potential confounders. Thus, possible biases as a result of  
5  
6 selective attrition and direct SES effects for child should be carefully examined in future  
7  
8 studies when using the JECS-A cohort data. The impact of the missing values can be adjusted  
9  
10 to some extent by comparing estimates resulting from the multiple imputation and from  
11  
12 complete case analysis, using the data of main study of the JECS as reference. However,  
13  
14 researchers must take into account the effect of response biases when conducting statistical  
15  
16 analyses using paired data for pregnant women and their children and when interpreting these  
17  
18 results.  
19  
20  
21  
22  
23  
24

## 25 **COLLABORATION**

26  
27  
28 The original data and specimens will be made available to investigators and stakeholders  
29  
30 working within the JECS-A project. The study must adhere to the JECS policy on the  
31  
32 availability of research results, publications, intellectual property rights, and data sharing. At  
33  
34 the moment, the Ethical Guidelines for Medical and Health Research Involving Human  
35  
36 Subjects enforced by the Japan Ministry of Education, Culture, Sports, Science and  
37  
38 Technology and the Ministry of Health, Labour and Welfare restrict the open sharing of  
39  
40 epidemiologic data. This means that researchers interested in using the data must collaborate  
41  
42 with and participate in the JECS-A project. This project was recently started and is still  
43  
44 ongoing. We are open to new proposals that fall within the nature of the JECS-A cohort.  
45  
46  
47  
48  
49  
50

## 51 **Acknowledgements**

52  
53  
54 We would like to express our gratitude to all the JECS-A cohort participants. We also  
55  
56 express our sincere appreciation to the collaborating hospitals, clinics, local healthcare  
57  
58 centers, local government agencies in Nagoya City and Ichinomiya City, and the JECS-A  
59  
60

1  
2  
3  
4 staff members for their continuous assistance in promoting this study. The authors also  
5  
6 specially thank Takaaki Hiraiwa, Hiroki Yoshizoe, Maiko Miyata, Hirohisa Kano and  
7  
8 Takahiro Kurihara for the data management and their assistance in the data analysis.  
9

## 10 11 12 13 **Contributors**

14  
15  
16 TE designed the JECS-A cohort architecture, developed the protocol, analyzed the data,  
17  
18 and wrote the first draft of the manuscript. YY and MT organized the study team, obtained  
19  
20 approvals and contributed to the development of the protocol, design, and data collection  
21  
22 tools. TOm was in charge of coordination with relevant organizations and organized the  
23  
24 JECS-A members. NS, SK, TMa and TOg performed the analysis and interpreted the data.  
25  
26 YI, HS, NO and JU designed and developed the protocol for the JECS-A sub-cohorts A2, A3  
27  
28 and B and edited and analyzed the data. AN, MK, YO, TMi, SSu, MSO and SSa designed  
29  
30 each adjunct study, supervised the data collection, and drafted the manuscript. MK was a  
31  
32 member of the JECS Steering Committee, was responsible for the study design and protocol,  
33  
34 supervised the data collection, and edited and drafted the manuscript. All the authors  
35  
36 interpreted the data, contributed to the writing of the manuscript, revised it critically for  
37  
38 important intellectual content, and agreed with the final version and the findings.  
39  
40  
41  
42  
43  
44  
45  
46  
47  
48  
49  
50  
51  
52  
53  
54  
55  
56  
57  
58  
59  
60

**Funding** The Japan Environment and Children's Study was funded by the Ministry of the  
Environment, Japan. This work was also supported by grants from the Environment Research  
and Technology Development Fund (ERTDF, No 5-1551 and 5-1851), Japan Society for the  
Promotion of Science (JSPS) KAKENHI Grant Number 16H03733, 25293151, 25285185,  
19H01078 and Grants-in-aid for research of Nagoya City University (2011-6, 2012-4,  
2013-2, 2013-10, 2014-4, 2015-10, 2016-4).

1  
2  
3  
4  
5  
6 **Competing Interests** None declared  
7  
8  
9

10  
11 **Ethical approval** This study was approved by the Review Board of the Ministry of the  
12 Environment, by the Institutional Review Board of Nagoya City University Graduate School  
13 of Medical Sciences (No. 70-00-0134; No. 00000544-6, 00000574-2) and by the Ethics  
14 of Medical Sciences (No. 70-00-0134; No. 00000544-6, 00000574-2) and by the Ethics  
15 Committees of all participating institutions.  
16  
17  
18  
19

20  
21  
22  
23 **Data sharing statement** The original data and specimens will be made available to  
24 investigators and stakeholders working within the JECS-A project.  
25  
26

27  
28 Researchers interested in collaborations or further information should contact the JECS-A  
29 secretariat by e-mail at [eisei@med.nagoya-cu.ac.jp](mailto:eisei@med.nagoya-cu.ac.jp).  
30  
31  
32

33  
34  
35 **Disclaimer** The findings and conclusions of this article are solely the responsibility of the  
36 authors and do not represent the official views of the Japanese government.  
37  
38  
39  
40  
41  
42  
43  
44

## 45 REFERENCES

- 46  
47 1. Ishitsuka K, Nakayama SF, Kishi R, et al. Japan Environment and Children's Study:  
48 backgrounds, activities, and future directions in global perspectives. *Environ Health*  
49 *Prev Med* 2017;22(1):61. doi: 10.1186/s12199-017-0667-y  
50  
51  
52 2. American Psychiatric Association. Diagnostic and Statistical Manual of Mental Disorders  
53 (DSM–5): American Psychiatric Association Publishing 2013:xiii-xv.  
54  
55  
56  
57 3. Xiang S, Carrie A. A review of the prevalence of Autism Spectrum Disorder in Asia,  
58  
59  
60

- 1  
2  
3  
4 Research in Autism Spectrum Disorders. *Autism Spectrum Disorders*  
5  
6 2010;4(2):156-67. doi: <http://dx.doi.org/10.1016/j.rasd.2009.10.003>.  
7  
8  
9 4. Hansen SN, Schendel DE, Parner ET. Explaining the increase in the prevalence of autism  
10  
11 spectrum disorders: the proportion attributable to changes in reporting practices.  
12  
13 *JAMA Pediatr* 2015;169(1):56-62. doi: 10.1001/jamapediatrics.2014.1893  
14  
15  
16 5. Rodriguez-Barranco M, Lacasana M, Aguilar-Garduno C, et al. Association of arsenic,  
17  
18 cadmium and manganese exposure with neurodevelopment and behavioural disorders  
19  
20 in children: a systematic review and meta-analysis. *Sci Total Environ*  
21  
22 2013;454-455:562-77. doi: 10.1016/j.scitotenv.2013.03.047  
23  
24  
25  
26 6. Rodrigues EG, Bellinger DC, Valeri L, et al. Neurodevelopmental outcomes among 2- to  
27  
28 3-year-old children in Bangladesh with elevated blood lead and exposure to arsenic  
29  
30 and manganese in drinking water. *Environ Health* 2016;15:44. doi:  
31  
32 10.1186/s12940-016-0127-y  
33  
34  
35  
36 7. Melchior M, Hersi R, van der Waerden J, et al. Maternal tobacco smoking in pregnancy  
37  
38 and children's socio-emotional development at age 5: The EDEN mother-child birth  
39  
40 cohort study. *Eur Psychiatry* 2015;30(5):562-8. doi: 10.1016/j.eurpsy.2015.03.005  
41  
42  
43  
44 8. Joelsson P, Chudal R, Talati A, et al. Prenatal smoking exposure and neuropsychiatric  
45  
46 comorbidity of ADHD: a finnish nationwide population-based cohort study. *BMC*  
47  
48 *Psychiatry* 2016;16:306. doi: 10.1186/s12888-016-1007-2  
49  
50  
51  
52 9. Han JY, Kwon HJ, Ha M, et al. The effects of prenatal exposure to alcohol and  
53  
54 environmental tobacco smoke on risk for ADHD: a large population-based study.  
55  
56 *Psychiatry Res* 2015;225(1-2):164-8. doi: 10.1016/j.psychres.2014.11.009  
57  
58  
59  
60 10. Padron A, Galan I, Garcia-Esquinas E, et al. Exposure to secondhand smoke in the home  
and mental health in children: a population-based study. *Tob Control*

- 2016;25(3):307-12. doi: 10.1136/tobaccocontrol-2014-052077
11. Polanska K, Ligocka D, Sobala W, et al. Phthalate exposure and child development: the Polish Mother and Child Cohort Study. *Early Hum Dev* 2014;90(9):477-85. doi: 10.1016/j.earlhumdev.2014.06.006
12. Kyriklaki A, Vafeiadi M, Kampouri M, et al. Prenatal exposure to persistent organic pollutants in association with offspring neuropsychological development at 4 years of age: The Rhea mother-child cohort, Crete, Greece. *Environ Int* 2016;97:204-11. doi: 10.1016/j.envint.2016.09.012
13. Goudarzi H, Nakajima S, Ikeno T, et al. Prenatal exposure to perfluorinated chemicals and neurodevelopment in early infancy: The Hokkaido Study. *Sci Total Environ* 2016;541:1002-10. doi: 10.1016/j.scitotenv.2015.10.017
14. Yolton K, Cornelius M, Ornoy A, et al. Exposure to neurotoxicants and the development of attention deficit hyperactivity disorder and its related behaviors in childhood. *Neurotoxicol Teratol* 2014;44:30-45. doi: 10.1016/j.ntt.2014.05.003
15. Engel SM, Wetmur J, Chen J, et al. Prenatal exposure to organophosphates, paraoxonase 1, and cognitive development in childhood. *Environ Health Perspect* 2011;119(8):1182-8. doi: 10.1289/ehp.1003183
16. Bouchard MF, Chevrier J, Harley KG, et al. Prenatal exposure to organophosphate pesticides and IQ in 7-year-old children. *Environ Health Perspect* 2011;119(8):1189-95. doi: 10.1289/ehp.1003185
17. Stein LJ, Gunier RB, Harley K, et al. Early childhood adversity potentiates the adverse association between prenatal organophosphate pesticide exposure and child IQ: The CHAMACOS cohort. *Neurotoxicology* 2016;56:180-87. doi: 10.1016/j.neuro.2016.07.010

- 1  
2  
3  
4 18. Yurumez E, Akca OF, Ugur C, et al. Mothers' alexithymia, depression and anxiety levels  
5  
6 and their association with the quality of mother-infant relationship: a preliminary  
7  
8 study. *Int J Psychiatry Clin Pract* 2014;18(3):190-6. doi:  
9  
10 10.3109/13651501.2014.940055  
11  
12  
13 19. Li Y, Jiang WQ, Du YS, et al. Relationships between behavioral symptoms of  
14  
15 non-medicated Chinese children with attention deficit hyperactivity disorder and  
16  
17 parenting stress: Comparison of different subtypes and comorbidities. *Asia Pac*  
18  
19 *Psychiatry* 2016;8(2):127-35. doi: 10.1111/appy.12213  
20  
21  
22  
23 20. Oya N, Ito Y, Hioki K, et al. Quantitative analysis of organophosphate insecticide  
24  
25 metabolites in urine extracted from disposable diapers of toddlers in Japan. *Int J Hyg*  
26  
27 *Environ Health* 2017;220(2 Pt A):209-16. doi: 10.1016/j.ijheh.2016.10.009  
28  
29  
30  
31 21. Saito S, Ueyama J, Kondo T, et al. A non-invasive biomonitoring method for assessing  
32  
33 levels of urinary pyrethroid metabolites in diapered children by gas  
34  
35 chromatography-mass spectrometry. *J Expo Sci Environ Epidemiol* 2014;24(2):200-7.  
36  
37 doi: 10.1038/jes.2013.31  
38  
39  
40 22. Robins DL, Casagrande K, Barton M, et al. Validation of the modified checklist for  
41  
42 Autism in toddlers, revised with follow-up (M-CHAT-R/F). *Pediatrics*  
43  
44 2014;133(1):37-45. doi: 10.1542/peds.2013-1813  
45  
46  
47 23. Manning JT, Baron-Cohen S, Wheelwright S, et al. The 2nd to 4th digit ratio and autism.  
48  
49 *Dev Med Child Neurol* 2001;43(3):160-4.  
50  
51  
52 24. Teatero ML, Netley C. A critical review of the research on the extreme male brain theory  
53  
54 and digit ratio (2D:4D). *J Autism Dev Disord* 2013;43(11):2664-76. doi:  
55  
56 10.1007/s10803-013-1819-6  
57  
58  
59 25. Guyatt AL, Heron J, Knight Ble C, et al. Digit ratio and autism spectrum disorders in the  
60

- 1  
2  
3  
4 Avon Longitudinal Study of Parents and Children: a birth cohort study. *BMJ Open*  
5  
6 2015;5(8):e007433. doi: 10.1136/bmjopen-2014-007433  
7  
8  
9 26. Slattery J, Morgan A, Douglas J. Early sucking and swallowing problems as predictors of  
10  
11 neurodevelopmental outcome in children with neonatal brain injury: a systematic  
12  
13 review. *Dev Med Child Neurol* 2012;54(9):796-806. doi:  
14  
15 10.1111/j.1469-8749.2012.04318.x  
16  
17  
18 27. Wolthuis-Stigter MI, Luinge MR, da Costa SP, et al. The association between sucking  
19  
20 behavior in preterm infants and neurodevelopmental outcomes at 2 years of age. *J*  
21  
22 *Pediatr* 2015;166(1):26-30. doi: 10.1016/j.jpeds.2014.09.007  
23  
24  
25 28. Kawamoto T, Nitta H, Murata K, et al. Rationale and study design of the Japan  
26  
27 environment and children's study (JECS). *BMC Public Health* 2014;14:25. doi:  
28  
29 10.1186/1471-2458-14-25  
30  
31  
32 29. Michikawa T, Nitta H, Nakayama SF, et al. The Japan Environment and Children's Study  
33  
34 (JECS): A Preliminary Report on Selected Characteristics of Approximately 10 000  
35  
36 Pregnant Women Recruited During the First Year of the Study. *J Epidemiol*  
37  
38 2015;25(6):452-8. doi: 10.2188/jea.JE20140186  
39  
40  
41  
42 30. Michikawa T, Nitta H, Nakayama SF, et al. Baseline Profile of Participants in the Japan  
43  
44 Environment and Children's Study (JECS). *J Epidemiol* 2018;28(2):99-104. doi:  
45  
46 10.2188/jea.JE20170018  
47  
48  
49 31. Booker CL, Harding S, Benzeval M. A systematic review of the effect of retention  
50  
51 methods in population-based cohort studies. *BMC Public Health* 2011;11:249. doi:  
52  
53 10.1186/1471-2458-11-249  
54  
55  
56 32. Moriguchi Y, Maeda M, Igarashi T, et al. Age and gender effect on alexithymia in large,  
57  
58 Japanese community and clinical samples: a cross-validation study of the Toronto  
59  
60

- 1  
2  
3  
4 Alexithymia Scale (TAS-20). *Biopsychosoc Med* 2007;1:7. doi:  
5  
6 10.1186/1751-0759-1-7  
7  
8  
9 33. National Centre for Japan Environment and Children's study. Japan Environment and  
10  
11 Children's study (JECS), Study Protocol (ver. 1.4) [Available from:  
12  
13 [https://www.env.go.jp/en/chemi/hs/jecs/data/about/jecs-study\\_protocol\\_14\\_en.pdf](https://www.env.go.jp/en/chemi/hs/jecs/data/about/jecs-study_protocol_14_en.pdf).  
14  
15  
16 34. Flacking R, Nyqvist KH, Ewald U. Effects of socioeconomic status on breastfeeding  
17  
18 duration in mothers of preterm and term infants. *Eur J Public Health*  
19  
20 2007;17(6):579-84. doi: 10.1093/eurpub/ckm019  
21  
22  
23 35. Ogden CL, Lamb MM, Carroll MD, et al. Obesity and socioeconomic status in children  
24  
25 and adolescents: United States, 2005-2008. *NCHS Data Brief* 2010(51):1-8.  
26  
27  
28 36. Eckenrode J, Smith EG, McCarthy ME, et al. Income inequality and child maltreatment  
29  
30 in the United States. *Pediatrics* 2014;133(3):454-61. doi: 10.1542/peds.2013-1707  
31  
32  
33 37. Violato M, Petrou S, Gray R, et al. Family income and child cognitive and behavioural  
34  
35 development in the United Kingdom: does money matter? *Health Econ*  
36  
37 2011;20(10):1201-25. doi: 10.1002/hec.1665  
38  
39  
40  
41  
42  
43  
44  
45  
46  
47  
48  
49  
50  
51  
52  
53  
54  
55  
56  
57  
58  
59  
60



1  
2  
3  
4  
5  
6  
7  
8  
9  
10  
11  
12  
13  
14  
15  
16  
17  
18  
19  
20  
21  
22  
23  
24  
25  
26  
27  
28  
29  
30  
31  
32  
33  
34  
35  
36  
37  
38  
39  
40  
41  
42  
43  
44  
45  
46  
47  
48  
49  
50  
51  
52  
53  
54  
55  
56  
57  
58  
59  
60

Figure legend/caption

Figure 1 Study areas covered by the JECS-A

Figure 2. Flowchart showing each stage of study recruitment for adjunct studies in the JECS-A

For peer review only

**Table 1** Summary of measurements collected for the adjunct studies conducted in JECS-A

| Main items                             | Sub-cohort covered                                                                        |    |    |   |   | Timing of measurement |         |                                |     |      |      |      |
|----------------------------------------|-------------------------------------------------------------------------------------------|----|----|---|---|-----------------------|---------|--------------------------------|-----|------|------|------|
|                                        | A1                                                                                        | A2 | A3 | B | C | prenatal (trimester)  |         | postnatal (months after birth) |     |      |      |      |
|                                        |                                                                                           |    |    |   |   | 1st                   | 2nd/3rd | 1 m                            | 6 m | 18 m | 24 m | 36 m |
| <b>Pregnant women</b>                  |                                                                                           |    |    |   |   |                       |         |                                |     |      |      |      |
| <b>Risk and confounding factors</b>    |                                                                                           |    |    |   |   |                       |         |                                |     |      |      |      |
| <b>Socio-demographic</b>               | Age, Maternal age, Marital status, Household income, Education level                      |    |    |   |   | ○                     | ○       | ○                              | ○   | ○    | ○    | ○    |
| <b>Lifestyle</b>                       | Smoking, Second-hand smoking, Drinking habits, Dietary status, Sleeping habits            |    |    |   |   | ○                     | ○       | ○                              | ○   | ○    | ○    | ○    |
| <b>Psychological and psychiatric</b>   | TAS-20                                                                                    |    |    |   |   | ●                     | ●       | ●                              |     |      |      |      |
|                                        | POMS-SF                                                                                   |    |    |   |   | ●                     | ●       |                                |     |      |      |      |
|                                        | Readiness of Parenthood Scale                                                             |    |    |   |   | ●                     | ●       | ●                              | ●   |      |      |      |
| <b>Obstetric</b>                       | History of pregnancy, infertility treatment, prenatal diagnosis and gestational duration  |    |    |   |   | ○                     |         |                                |     |      |      |      |
| <b>Biomonitoring data</b>              | Urine (up to 50 ml, mothers only), parental blood (up to 1.5ml), cord blood (up to 1.5ml) |    |    |   |   |                       | ●       | ●                              | ●   | ●    |      |      |
| <b>Children</b>                        |                                                                                           |    |    |   |   |                       |         |                                |     |      |      |      |
| <b>Risk and confounding factors</b>    |                                                                                           |    |    |   |   |                       |         |                                |     |      |      |      |
| <b>Demographic</b>                     | Height, Weight, BMI, Sex                                                                  |    |    |   |   | ○                     | ○       | ○                              | ○   | ○    |      |      |
| <b>Behavioral</b>                      | Neonatal oral-motor assessment                                                            |    |    |   |   | ●                     |         | ●                              |     |      |      |      |
|                                        | DCDQ                                                                                      |    |    |   |   | ●                     |         |                                | ●   |      | ●    |      |
| <b>Childcare</b>                       | Breast feeding and weaning food status                                                    |    |    |   |   | ●                     |         |                                | ●   |      |      |      |
| <b>Psychological and psychiatric</b>   | Mary Rothbart's Temperament Questionnaires                                                |    |    |   |   | ●                     |         |                                |     |      |      |      |
|                                        | · IBQ-R-SF                                                                                |    |    |   |   |                       |         |                                | ●   |      |      |      |
|                                        | · ECBQ-SF                                                                                 |    |    |   |   |                       |         |                                |     |      | ●    |      |
| <b>Biomonitoring data</b>              | Overnight urine extracted from disposable diapers (up to 30ml)                            |    |    |   |   |                       |         |                                |     | ●    |      | ●    |
| <b>Anthropometric data</b>             | 2D:4D                                                                                     |    |    |   |   |                       |         |                                |     | ●    |      | ●    |
| <b>Outcome examples to be analyzed</b> |                                                                                           |    |    |   |   |                       |         |                                |     |      |      |      |
| <b>LBW</b>                             |                                                                                           | ○  | ○  |   |   |                       |         | ○                              |     |      |      |      |
| <b>ASD</b>                             | ○                                                                                         | ○  | ○  | ○ | ○ |                       |         |                                |     |      | ○    |      |
| <b>ADHD</b>                            | ○                                                                                         | ○  | ○  |   | ○ |                       |         |                                |     |      | ○    |      |

1  
2  
3  
4  
5  
6 ○: Refer to the main study of the Japan Environment and Children's Study (JECS), ●: Measurements conducting solely in the JECS-A  
7  
8  
9

10 **BMI**, body mass index; **TAS-20**, the 20-item Toronto Alexithymia Scale; **POMS-SF**, Short form of the Profile of Mood States; **IBQ-R-SF**, The Infant Behavior Questionnaire  
11 Revised Short Form; **ECBQ-SF**, Early Childhood Behavior Questionnaire Short Form; **DCDQ**, Developmental Coordination Disorder Questionnaire, **2D:4D**, the second to  
12 fourth digit ratio; **PARS**, Pervasive Developmental Disorders Autism Society Japan Rating Scale; **ASD**, autism spectrum disorder; **ADHD**, attention deficit hyperactivity  
13 disorder; **LBW**, low birth weight.  
14  
15

16 **Sub cohort A1**, Agreement on the adjunct questionnaire survey only; **Sub cohort A2**, Agreement on the adjunct questionnaire survey and provision of mother's  
17 biological specimen (blood and urine); **Sub cohort A3**, Agreement on the adjunct questionnaire survey and provision of mother's biological specimen (blood and urine)  
18 with genetic analyses; **Sub cohort B**, Informed consent obtained from guardians (legally acceptable representatives) for provision of child's biological specimen; **Sub**  
19 **cohort C**, Informed consent obtained from guardians (legally acceptable representatives) for anthropometry measurement on child hands  
20  
21  
22  
23  
24  
25  
26  
27  
28  
29  
30  
31  
32  
33  
34  
35  
36  
37  
38  
39  
40  
41  
42  
43  
44  
45  
46  
47  
48  
49  
50  
51  
52  
53  
54  
55  
56  
57  
58  
59  
60

For peer review only

**Table 2** Comparison of the J ECS-A baseline data with national statistics in Aichi prefecture for pregnant women: verification of representativeness of the sample

|                                              | J ECS-A baseline cohort of pregnant women (95% CI) | National statistics (Aichi pref.) |
|----------------------------------------------|----------------------------------------------------|-----------------------------------|
| <b>Pregnant women <sup>a</sup> (n)</b>       | 5721                                               | 65218                             |
| <b>Age at Delivery <sup>a</sup></b>          |                                                    |                                   |
| 15-19 (%)                                    | 0.7 (0.5-0.9)                                      | 1.3                               |
| 20-24                                        | 6.7 (6.0-7.3)                                      | 8.2                               |
| 25-29                                        | 25.3 (24.1-26.4)                                   | 28.3                              |
| 30-34                                        | 36.4 (35.1-37.6)                                   | 36.6                              |
| 35-39                                        | 23.2 (22.1-24.3)                                   | 21.4                              |
| 40-44                                        | 4.9 (4.4-5.5)                                      | 4.2                               |
| 45-49                                        | 0.1 (0.0-0.2)                                      | 0.1                               |
| 50-                                          | 0.0                                                | 0.0                               |
| Missing (n)                                  | 157                                                |                                   |
| <b>Education level <sup>b</sup> (n)</b>      |                                                    | 2397000                           |
| Junior high school/High school (%)           | 29.9 (28.7-31.1)                                   | 47.2                              |
| College/Junior college/Technology college    | 35.3 (34.1-36.6)                                   | 20.8                              |
| University                                   | 27.6 (26.4-28.8)                                   | 28.4                              |
| Graduate school                              | 1.6 (1.3-2.0)                                      | 3.6                               |
| Missing (n)                                  | 315                                                |                                   |
| <b>Household income <sup>b c d</sup> (n)</b> |                                                    | 3018900                           |
| <2,000 (%)                                   | 2.4 (2.0-2.8)                                      | 18.1                              |
| 2,000-<4,000                                 | 24.4 (23.3-25.5)                                   | 26.7                              |
| 4,000-<6,000                                 | 33.1 (31.9-34.3)                                   | 20.2                              |
| 6,000-<8,000                                 | 17.2 (16.2-18.2)                                   | 13.4                              |
| 8,000-<10,000                                | 7.4 (6.7-8.1)                                      | 8.3                               |
| ≥10,000                                      | 4.3 (3.7-4.8)                                      | 5.0                               |
| Missing (n)                                  | 643                                                |                                   |

<sup>a</sup> Data of Aichi prefecture as reference, provided by national vital statistics, Ministry of Health, Labour and Welfare in 2014.

<sup>b</sup> Data of Aichi prefecture provided by Ministry of Internal Affairs and Communications in 2012.

<sup>c</sup> Population of Aichi Prefecture including single-person households and families

<sup>d</sup> Household income shows thousand Japanese Yen(JPY), 110 JPY = 1US\$ as of 2019

1  
2  
3  
4  
5  
6  
7  
8  
9  
10  
11  
12  
13  
14  
15  
16  
17  
18  
19  
20  
21  
22  
23  
24  
25  
26  
27  
28  
29  
30  
31  
32  
33  
34  
35  
36  
37  
38  
39  
40  
41  
42  
43  
44  
45  
46  
47  
48  
49  
50  
51  
52  
53  
54  
55  
56  
57  
58  
59  
60

---

-: no available data provided; 95%CI: 95% Confidence Interval

For peer review only

**Table 3** Comparison of the J ECS-A baseline data with national statistics in Aichi prefecture for children: verification of representativeness of the sample

|                                            | J ECS-A baseline cohort of children (n = 5457) |                 |                 | National statistics (Aichi pref.) <sup>a</sup> |        |        |
|--------------------------------------------|------------------------------------------------|-----------------|-----------------|------------------------------------------------|--------|--------|
|                                            | Total                                          | Male            | Female          | Total                                          | Male   | Female |
| <b>Children (n)<sup>b</sup></b>            | 5457                                           | 2793            | 2659            | 65218                                          | 33649  | 31569  |
| <b>Sex (Singleton births)</b>              |                                                |                 |                 |                                                |        |        |
| (%)                                        |                                                | 51.2            | 48.7            |                                                | 51.6   | 48.4   |
| 95% CI                                     |                                                | (50.5-51.9)     | (48.0-49.4)     |                                                |        |        |
| Missing (n)                                | 5                                              |                 |                 |                                                |        |        |
| <b>Birth weight, g (Singleton births)</b>  |                                                |                 |                 |                                                |        |        |
| Mean                                       | 3034.3                                         | 3076.1          | 2990.7          | 3000.0                                         | 3040.0 | 2950.0 |
| 95%CI                                      | (3022.9-3045.7)                                | (3059.7-3092.5) | (2975.1-3006.3) | -                                              | -      | -      |
| Missing (n)                                | 43                                             | 23              | 16              |                                                |        |        |
| <b>Low birth weight (Singleton births)</b> |                                                |                 |                 |                                                |        |        |
| <2500 g (%)                                | 7.8                                            | 6.6             | 9.0             | 9.8                                            | 8.5    | 11.1   |
| 95%CI                                      | (7.4-8.2)                                      | (6.3-6.9)       | (8.7-9.3)       |                                                |        |        |
| Missing (n)                                | 43                                             | 23              | 16              |                                                |        |        |
| <b>Birth length, cm (Singleton births)</b> |                                                |                 |                 |                                                |        |        |
| Mean                                       | 49.7                                           | 49.9            | 49.5            | 49.3                                           | 49.6   | 49.1   |
| 95%CI                                      | (49.6-49.8)                                    | (49.8-50.0)     | (49.4-49.6)     | -                                              | -      | -      |
| Missing (n)                                | 51                                             | 28              | 19              |                                                |        |        |

1  
2  
3  
4  
5  
6  
7  
8  
9  
10  
11  
12  
13  
14  
15  
16  
17  
18  
19  
20  
21  
22  
23  
24  
25  
26  
27  
28  
29  
30  
31  
32  
33  
34  
35  
36  
37  
38  
39  
40  
41  
42  
43  
44  
45  
46  
47  
48  
49  
50  
51  
52  
53  
54  
55  
56  
57  
58  
59  
60

<sup>a</sup> Data of Aichi prefecture as reference, provided by national vital statistics, Ministry of Health, Labour and Welfare in 2014.

<sup>b</sup> Multiple births (49 pairs of twins) were excluded.

-: no available data provided, 95%CI: 95% Confidence Interval

For peer review only

**Table 4** Baseline characteristics of paired data of pregnant women and their children in the JECS-A cohort

|                                      | Sub-cohort |      |      |      |      |
|--------------------------------------|------------|------|------|------|------|
|                                      | A1         | A2   | A3   | B    | C    |
| <b>Pregnant women (n)</b>            | 3426       | 2924 | 1753 | 1352 | 1187 |
| <b>Age at Delivery</b>               |            |      |      |      |      |
| Mean                                 | 31.6       | 31.7 | 31.8 | 31.8 | 32.0 |
| SD                                   | 4.9        | 4.9  | 5.0  | 4.8  | 4.7  |
| Missing (n)                          | 44         | 14   | 7    | 0    | 0    |
| <b>Smoking habits</b>                |            |      |      |      |      |
| Never smoked (%)                     | 62.8       | 63.7 | 63.7 | 64.2 | 64.6 |
| Ex-smokers who quit before pregnancy | 21.6       | 22.0 | 23.1 | 21.8 | 23.1 |
| Smokers during early pregnancy       | 9.0        | 9.0  | 8.3  | 8.4  | 7.7  |
| Smokers                              | 2.5        | 2.5  | 2.1  | 2.8  | 2.2  |
| Missing (n)                          | 144        | 82   | 51   | 38   | 29   |
| <b>Second-hand smoking</b>           |            |      |      |      |      |
| Rarely (%)                           | 67.5       | 69.1 | 69.6 | 68.6 | 71.9 |
| A few days a week                    | 18.6       | 18.6 | 18.0 | 19.1 | 17.1 |
| Daily                                | 10.4       | 10.1 | 10.3 | 10.1 | 9.6  |
| Missing (n)                          | 124        | 66   | 36   | 30   | 17   |
| <b>Household income (JPY)</b>        |            |      |      |      |      |
| <2,000 (%)                           | 2.3        | 2.1  | 2.5  | 1.8  | 2.1  |
| 2,000-<4,000                         | 25.8       | 26.0 | 25.6 | 24.4 | 24.3 |
| 4,000-<6,000                         | 33.4       | 33.7 | 34.2 | 35.1 | 35.9 |
| 6,000-<8,000                         | 17.5       | 18.1 | 17.5 | 18.6 | 18.6 |
| 8,000-<10,000                        | 7.3        | 7.5  | 7.8  | 7.5  | 8.3  |
| ≥10,000                              | 4.5        | 4.7  | 4.5  | 3.9  | 4.5  |
| Missing (n)                          | 314        | 233  | 141  | 116  | 76   |



|                                            |        |        |        |        |        |
|--------------------------------------------|--------|--------|--------|--------|--------|
| <b>Children (n)<sup>a</sup></b>            | 3336   | 2884   | 1726   | 1346   | 1182   |
| <b>Sex (Singleton births)</b>              |        |        |        |        |        |
| Male (%)                                   | 50.5   | 50.4   | 50.1   | 49.9   | 50.4   |
| Female                                     | 49.5   | 49.6   | 49.8   | 50.1   | 49.6   |
| Missing (n)                                | 1      | 1      | 1      | 0      | 0      |
| <b>Birth weight, g (Singleton births)</b>  |        |        |        |        |        |
| Mean                                       | 3041.6 | 3052.3 | 3054.1 | 3039.1 | 3062.3 |
| SD                                         | 432.8  | 419.9  | 430.4  | 410.0  | 416.7  |
| Missing (n)                                | 22     | 15     | 9      | 4      | 7      |
| <b>Birth height, cm (Singleton births)</b> |        |        |        |        |        |
| Mean                                       | 49.6   | 49.7   | 49.7   | 49.7   | 49.7   |
| SD                                         | 2.3    | 2.2    | 2.2    | 2.1    | 2.1    |
| Missing (n)                                | 28     | 18     | 11     | 6      | 8      |

<sup>a</sup> Multiple births (twin pairs) were excluded; A1: 20 (n = 40), A2: 16 (n = 32), A3: 12 (n = 24), B: 5 (n = 10), and C: 6 (n = 12).

**Sub cohort A1**, Agreement on the adjunct questionnaire survey only; **Sub cohort A2**, Agreement on the adjunct questionnaire survey and provision of mother's biological specimen (blood and urine); **Sub cohort A3**, Agreement on the adjunct questionnaire survey and provision of mother's biological specimen (blood and urine) with genetic analysis; **Sub cohort B**, Informed consent obtained for provision of child's biological specimen from guardian (legally acceptable representatives); **Sub cohort C**, Informed consent obtained for anthropometry measurement on child hands from guardians (legally acceptable representatives). JPY: Japanese Yen, 110 JPY = 1 US\$ as of 2019

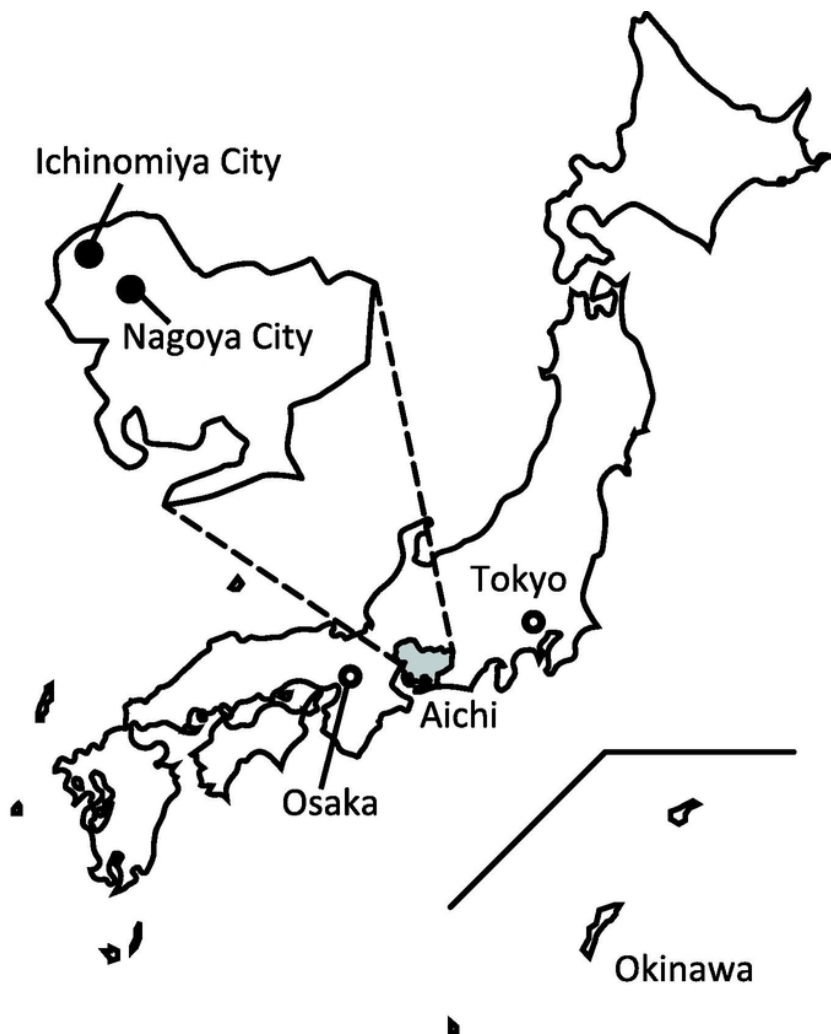

Figure 1 Study areas covered by the JECs-A

Figure 1 Study areas covered by the JECs-A

65x82mm (300 x 300 DPI)

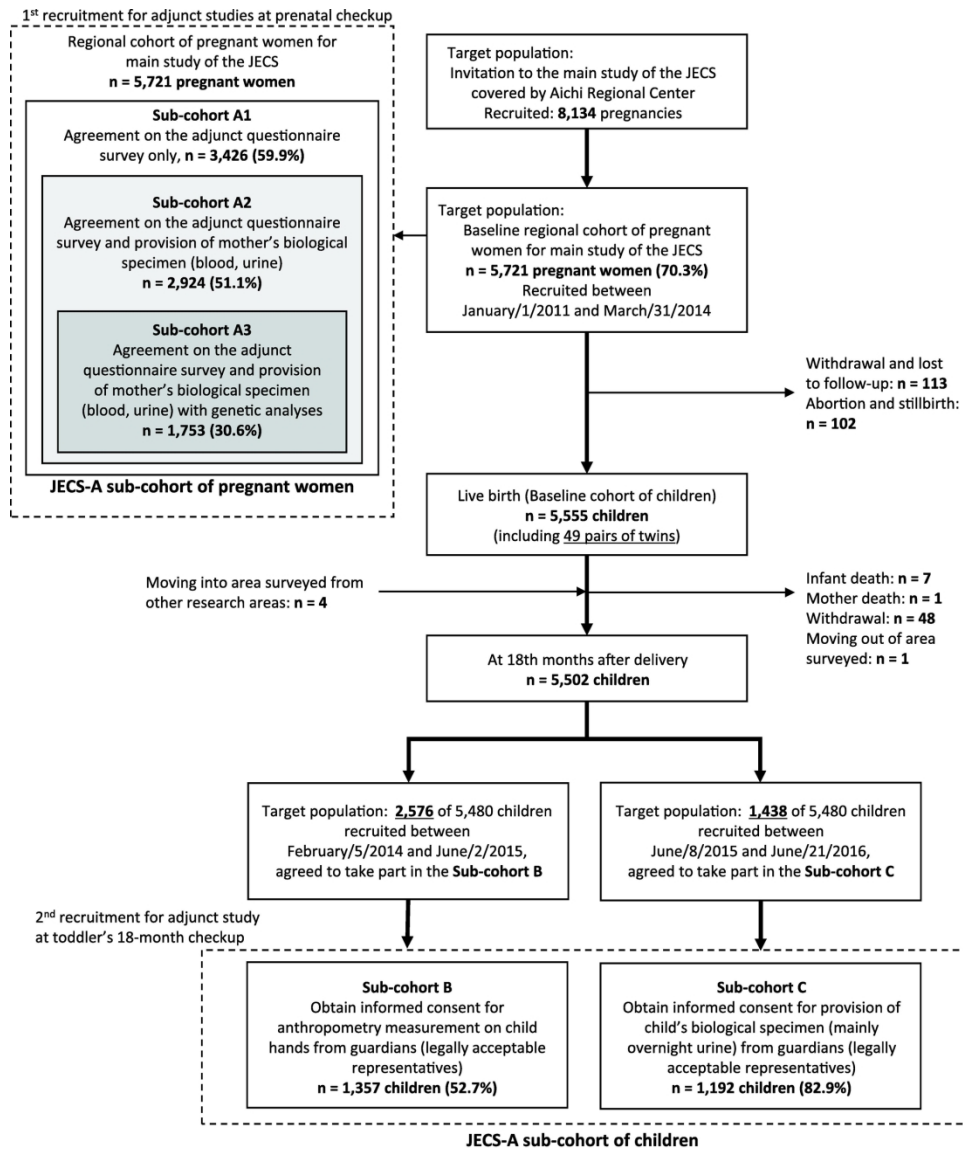

Figure 2. Flowchart showing each stage of study recruitment for adjunct studies in the JECs-A

Figure 2. Flowchart showing each stage of study recruitment for adjunct studies in the JECs-A

178x223mm (300 x 300 DPI)

# BMJ Open

## Cohort profile: Aichi regional sub-cohort of the Japan Environment and Children's Study (JECS-A)

|                               |                                                                                                                                                                                                                                                                                                                                                                                                                                                                                                                                                                                                                                                                                                                                                                                                                                                                                                                                                                                                                                                                                                                                                                                                                                                                                                                                                                                                                                                                                                                                                                                                                                                                                                                                                                                                                                                                                                                                                                                                                                                                                                                                                                                                                                                                                                                                                                                                                                                                                                                                                                                                                                                |
|-------------------------------|------------------------------------------------------------------------------------------------------------------------------------------------------------------------------------------------------------------------------------------------------------------------------------------------------------------------------------------------------------------------------------------------------------------------------------------------------------------------------------------------------------------------------------------------------------------------------------------------------------------------------------------------------------------------------------------------------------------------------------------------------------------------------------------------------------------------------------------------------------------------------------------------------------------------------------------------------------------------------------------------------------------------------------------------------------------------------------------------------------------------------------------------------------------------------------------------------------------------------------------------------------------------------------------------------------------------------------------------------------------------------------------------------------------------------------------------------------------------------------------------------------------------------------------------------------------------------------------------------------------------------------------------------------------------------------------------------------------------------------------------------------------------------------------------------------------------------------------------------------------------------------------------------------------------------------------------------------------------------------------------------------------------------------------------------------------------------------------------------------------------------------------------------------------------------------------------------------------------------------------------------------------------------------------------------------------------------------------------------------------------------------------------------------------------------------------------------------------------------------------------------------------------------------------------------------------------------------------------------------------------------------------------|
| Journal:                      | <i>BMJ Open</i>                                                                                                                                                                                                                                                                                                                                                                                                                                                                                                                                                                                                                                                                                                                                                                                                                                                                                                                                                                                                                                                                                                                                                                                                                                                                                                                                                                                                                                                                                                                                                                                                                                                                                                                                                                                                                                                                                                                                                                                                                                                                                                                                                                                                                                                                                                                                                                                                                                                                                                                                                                                                                                |
| Manuscript ID                 | bmjopen-2018-028105.R2                                                                                                                                                                                                                                                                                                                                                                                                                                                                                                                                                                                                                                                                                                                                                                                                                                                                                                                                                                                                                                                                                                                                                                                                                                                                                                                                                                                                                                                                                                                                                                                                                                                                                                                                                                                                                                                                                                                                                                                                                                                                                                                                                                                                                                                                                                                                                                                                                                                                                                                                                                                                                         |
| Article Type:                 | Cohort profile                                                                                                                                                                                                                                                                                                                                                                                                                                                                                                                                                                                                                                                                                                                                                                                                                                                                                                                                                                                                                                                                                                                                                                                                                                                                                                                                                                                                                                                                                                                                                                                                                                                                                                                                                                                                                                                                                                                                                                                                                                                                                                                                                                                                                                                                                                                                                                                                                                                                                                                                                                                                                                 |
| Date Submitted by the Author: | 10-Oct-2019                                                                                                                                                                                                                                                                                                                                                                                                                                                                                                                                                                                                                                                                                                                                                                                                                                                                                                                                                                                                                                                                                                                                                                                                                                                                                                                                                                                                                                                                                                                                                                                                                                                                                                                                                                                                                                                                                                                                                                                                                                                                                                                                                                                                                                                                                                                                                                                                                                                                                                                                                                                                                                    |
| Complete List of Authors:     | <p>Ebara, Takeshi; Nagoya City University Graduate School of Medical Sciences and Medical School, Department of Occupational and Environmental Health</p> <p>Yamada, Yasuyuki; Nagoya City University Graduate School of Medical Sciences and Medical School, Department of Occupational and Environmental Health; Juntendo University School of Health and Sports Science Graduate School of Health and Sports Science</p> <p>Shoji, Naoto; Nagoya City University Graduate School of Medical Sciences and Medical School, Department of Occupational and Environmental Health; Asahi University, School of Health Sciences</p> <p>Ito, Yuki; Nagoya City University Graduate School of Medical Sciences and Medical School, Department of Occupational and Environmental Health</p> <p>Nakagawa, Atsuko; Nagoya City University Faculty of Humanities and Social Sciences Graduate School of Humanities and Social Sciences</p> <p>Miyachi, Taishi; Nagoya City University Graduate School of Medical Sciences and Medical School, Pediatrics and Neonatology; Nagoya West District Care Center for Disabled Children</p> <p>Ozaki, Yasuhiko; Nagoya City University Graduate School of Medical Sciences and Medical School, Obstetrics and Gynecology</p> <p>Omori, Toyonori; Nagoya City University Graduate School of Medical Sciences and Medical School, Health Care Policy and Management</p> <p>Suzuki, Sadao; Nagoya City University Graduate School of Medical Sciences and Medical School, Department of Public Health</p> <p>Kojima, Masayo ; Nagoya City University Graduate School of Medical Sciences and Medical School, Medical Education</p> <p>Ueyama, Jun; Nagoya University Graduate School of Medicine Faculty of Medicine, Department of Pathophysiological Laboratory Sciences, Field of Radiological and Medical Laboratory Sciences</p> <p>Tomizawa, Motohiro; Nagoya City University Graduate School of Medical Sciences and Medical School, Department of Occupational and Environmental Health; Tokyo University of Agriculture</p> <p>Kato, Sayaka; Nagoya City University Graduate School of Medical Sciences and Medical School, Department of Occupational and Environmental Health; Nagoya City University Graduate School of Medical Sciences and Medical School, Pediatrics and Neonatology</p> <p>Oguri, Tomoko; Nagoya City University Graduate School of Medical Sciences and Medical School, Department of Occupational and Environmental Health; National Institute of Advanced Industrial Science and Technology (AIST)</p> <p>Matsuki, Taro; Nagoya City University Graduate School of Medical</p> |

|                                 |                                                                                                                                                                                                                                                                                                                                                                                                                                                                                                                                                                                                                                                                                                                                                                                                                      |
|---------------------------------|----------------------------------------------------------------------------------------------------------------------------------------------------------------------------------------------------------------------------------------------------------------------------------------------------------------------------------------------------------------------------------------------------------------------------------------------------------------------------------------------------------------------------------------------------------------------------------------------------------------------------------------------------------------------------------------------------------------------------------------------------------------------------------------------------------------------|
|                                 | Sciences and Medical School, Department of Occupational and Environmental Health<br>Sato, Hiroataka; Nagoya City University Graduate School of Medical Sciences and Medical School, Department of Occupational and Environmental Health<br>Oya, Naoko; Nagoya City University Graduate School of Medical Sciences and Medical School, Department of Occupational and Environmental Health<br>Sugiura-Ogasawara , M; Nagoya City University Graduate School of Medical Sciences and Medical School, Obstetrics and Gynecology<br>Saitoh, Shinji; Nagoya City University Graduate School of Medical Sciences and Medical School, Pediatrics and Neonatology<br>Kamijima, Michihiro; Nagoya City University Graduate School of Medical Sciences and Medical School, Department of Occupational and Environmental Health |
| <b>Primary Subject Heading</b>: | Epidemiology                                                                                                                                                                                                                                                                                                                                                                                                                                                                                                                                                                                                                                                                                                                                                                                                         |
| Secondary Subject Heading:      | Epidemiology, Paediatrics                                                                                                                                                                                                                                                                                                                                                                                                                                                                                                                                                                                                                                                                                                                                                                                            |
| Keywords:                       | JECS, birth cohort, EPIDEMIOLOGY, JECS-A                                                                                                                                                                                                                                                                                                                                                                                                                                                                                                                                                                                                                                                                                                                                                                             |
|                                 |                                                                                                                                                                                                                                                                                                                                                                                                                                                                                                                                                                                                                                                                                                                                                                                                                      |

SCHOLARONE™  
Manuscripts

## Cohort profile: Aichi regional sub-cohort of the Japan Environment and Children's

### Study (JECS-A)

Takeshi Ebara<sup>1</sup>, Yasuyuki Yamada<sup>1,9</sup>, Naoto Shoji<sup>1,10</sup>, Yuki Ito<sup>1</sup>, Atsuko Nakagawa<sup>7</sup>, Taishi Miyachi<sup>2,11</sup>, Yasuhiko Ozaki<sup>3</sup>, Toyonori Omori<sup>4</sup>, Sadao Suzuki<sup>5</sup>, Masayo Kojima<sup>6</sup>, Jun Ueyama<sup>8</sup>, Motohiro Tomizawa<sup>1†</sup>, Sayaka Kato<sup>1,2</sup>, Tomoko Oguri<sup>1††</sup>, Taro Matsuki<sup>1</sup>, Hirotaka Sato<sup>1</sup>, Naoko Oya<sup>1</sup>, Mayumi Sugiura-Ogasawara<sup>3</sup>, Shinji Saitoh<sup>2</sup>, Michihiro Kamijima<sup>1</sup>

Department of <sup>1</sup>Occupational and Environmental Health, <sup>2</sup>Pediatrics and Neonatology, <sup>3</sup>Obstetrics and Gynecology, <sup>4</sup>Health Care Policy and Management, <sup>5</sup>Public Health, <sup>6</sup>Medical Education, Nagoya City University, Graduate School of Medical Sciences, Nagoya, Japan  
<sup>7</sup>School of Humanities and Social Sciences, Nagoya City University, Nagoya, Japan  
<sup>8</sup>Department of Pathophysiological Laboratory Sciences, Field of Radiological and Medical Laboratory Sciences, Nagoya University Graduate School of Medicine, Japan.  
<sup>9</sup>Juntendo University Graduate School of Health and Sports Science, Chiba, Japan  
<sup>10</sup> Asahi University, School of Health Sciences  
<sup>11</sup>Nagoya West District Care Center for Disabled Children, Nagoya, Japan

Present affiliation: †Tokyo University of Agriculture, ††National Institute of Advanced Industrial Science and Technology (AIST)

Corresponding Author:

Takeshi Ebara, PhD.

Department of Occupational and Environmental Health, Nagoya City University, Graduate School of Medical Sciences. Mizuho-ku, Nagoya, 4678601, Japan

TEL: 81-52-853-8171 FAX: 81-52-859-1228

e-mail: ebara@med.nagoya-cu.ac.jp

**ABSTRACT**

**Purpose:** Effects of fetal, perinatal and childhood environment on the health of children at birth and during later life have become a topic of concern. The Aichi regional sub-cohort of the Japan Environment and Children's Study (JECS-A) is an ongoing birth cohort of pregnant women and their children that has been used to provide unique data, as adjunct studies of JECS, on multifaceted potential factors affecting children's health.

**Participants:** The JECS-A is part of the Japan Environment and Children's Study (JECS) which follows a total of 100,000 pairs of children and their mothers (fathers' participation is optional) across 15 regions in Japan. In JECS-A, of the 8,134 pregnant women living in Ichinomiya City and Nagoya City, Japan, a total of 5,721 pregnant women and their 5,555 children were included. Sociodemographic and psychological data as well as biological specimens were collected from the pregnant women and their spouses (if available) in the cohort during their pregnancy. Information on children included in the JECS-A was collected from their mothers and includes demographic, behavioral, childcare, psychological and psychiatric data. Urine extracted from disposable diapers and anthropometric data were also obtained from the children.

**Findings to date:** A similar distribution trend for age at delivery was confirmed between the pregnant women enrolled in the JECS-A and the national statistics of the relevant areas. However, differences in education level and household income were observed. A total of 5,502 children remained in the cohort at 18 months after delivery. Compared with the national statistics, the basic demographics of the children in the cohort represented the population in the study areas.

**Future plans:** The enrolled children in the JECS-A will be followed until the age of 13 years. The studies that come from JECS-A will complement JECS and bring novel results with a high level of generalizability.

(300 words)

1  
2  
3  
4  
5 **Strengths and limitations of this study**

- 6  
7  
8  
9  
10  
11  
12  
13  
14  
15  
16  
17  
18  
19  
20  
21  
22  
23  
24  
25  
26  
27  
28  
29  
30  
31  
32  
33  
34  
35  
36  
37  
38  
39  
40  
41  
42  
43  
44  
45  
46  
47  
48  
49  
50  
51  
52  
53  
54  
55  
56  
57  
58  
59  
60
- The main strength of the JECs-A of children is its large sample size, reflecting a representative population.
  - Another strength can be found in considering multifaceted potential factors affecting children's health in the prospective birth cohort over two generations.
  - The main limitation of the cohort is that the population with low-income households is not included.

For peer review only



## INTRODUCTION

The effects of fetal, perinatal and childhood environmental factors on the health of children at birth and during later life are a topic of concern. A number of birth cohort studies have thus been conducted worldwide to address this issue, and the Japan Environment and Children's Study (JECS), which focuses on the effects of environmental chemical pollutants, is one of the largest. The JECS was launched in 2011 by the Ministry of the Environment, Japan, after 3 years of planning.<sup>1</sup> The JECS consists of nationwide regional sub-cohorts that can be used to conduct studies, so called as adjunct studies of JECS, which are independent of the main study of the JECS. This article describes the cohort profile of a regional sub-cohort of the JECS, the Aichi regional sub-cohort of the JECS (JECS-A), containing 5,721 pregnant women and their 5,555 children. The following research themes are the main focuses of the adjunct studies conducted in JECS-A.

The first one is neurodevelopmental disorders<sup>2</sup> including intellectual disability, communication disorders, autism spectrum disorder (ASD), attention deficit hyperactivity disorder (ADHD), specific learning disorder, and motor disorders. A review has indicated that the estimated prevalence of ASD in Asia before 1980 was around 1.9/10,000, but this figure has recently increased by ten times.<sup>3</sup> Though a previous study conducted in Denmark claimed that 33% of the increase in the prevalence of ASD in recent years can be accounted for by changes in the diagnostic criteria and reporting methods,<sup>4</sup> this increased prevalence remains a complex and highly controversial issue that needs to be addressed. Recent epidemiological studies have linked neurodevelopmental outcomes to prenatal exposure to environmental toxicants such as heavy metals,<sup>5,6</sup> prenatal tobacco exposure,<sup>7,8</sup> environmental tobacco exposure,<sup>9,10</sup> phthalates,<sup>11</sup> persistent organic pollutants,<sup>12,13</sup> and organophosphate pesticides (OPs).<sup>14,15</sup> Furthermore, interest is growing regarding the potential role of social

1  
2  
3  
4 stressors in modifying the relationship between the above early childhood exposure and the  
5  
6 neurodevelopmental outcomes. A cohort study of seven-year-old predominantly Mexican  
7  
8 American children in California's Salinas Valley suggested that social adversities including a  
9  
10 poor learning environment and parent-child interactions were significantly associated with a  
11  
12 moderate decrease in the intelligence quotient (IQ) score and its subset scores.<sup>17</sup> Several  
13  
14 recent studies have also discussed the effects of parent-child interactions, focusing on the  
15  
16 effects of alexithymia in mothers<sup>18</sup> and of depressive symptoms on parenting stress.<sup>19</sup> Thus,  
17  
18 there is the need to investigate postnatal influences, such as the effects of interactions  
19  
20 between mothers and their children, as well as prenatal and postnatal toxicant exposures on  
21  
22 the neurodevelopment of children. The above research questions will be addressed to  
23  
24 complement those of the main study of the JECS.  
25  
26  
27  
28  
29

30  
31 The second theme of the adjunct studies conducted in JECS-A is the exposure assessments  
32  
33 using urine collected during early childhood when the central nervous system develops  
34  
35 rapidly. So far, the amount of exposure to environmental chemical substances taken into the  
36  
37 bodies of infants has rarely been investigated because most infants wear diapers that fully  
38  
39 absorb all urine. Noninvasive biomonitoring using urine samples is thus required especially  
40  
41 for exposure assessments of chemicals with short biological half lives, and a methodology  
42  
43 for extracting urine from used disposable diapers has been investigated in our previous  
44  
45 studies.<sup>20 21</sup> Since the urine during early childhood was not collected in the main study of the  
46  
47 JECS, the adjunct studies using such urine in JECS-A will address research questions  
48  
49 regarding environmental exposure in that period.  
50  
51  
52  
53

54  
55 The third theme of the adjunct studies is the investigation of objective screening tools to  
56  
57 detect neurodevelopmental disorders at earlier stages. Public health services in local  
58  
59 communities must be capable of providing early intervention support for children with such  
60

1  
2  
3  
4 disorders. Preventive screening during early childhood can help to minimize later difficulties  
5  
6 and to improve the trajectory of subjects with neurodevelopmental disorders in later life. For  
7  
8 example, a validated screening checklist for autism at the age of 2 years, called  
9  
10 M-CHAT-R/F,<sup>22</sup> is available as part of early medical checkups, but this screening protocol  
11  
12 requires a 2-step screening test that must be conducted by a physician. As a secondary tool  
13  
14 allowing easy and objective screening the second to fourth digit (2D:4D) ratio, which is  
15  
16 defined as the proportion between the lengths of the index and ring fingers, might be useful.  
17  
18 A previous study suggested that autistic children aged 2 to 14 years have a smaller 2D:4D  
19  
20 ratio than normal children of the same generation.<sup>23</sup> Recent studies<sup>24 25</sup> have also investigated  
21  
22 whether the 2D:4D ratio, a controversial but commonly used proxy marker of prenatal  
23  
24 androgen concentrations based on the extreme male brain theory, is associated with ASD.  
25  
26 However, this hypothetical screening method needs further scientific evidence in different  
27  
28 epidemiological settings in different part of the globe. Another recent trial aiming to early  
29  
30 intervention for neurodevelopmental problems can be found in neonatal oral-motor  
31  
32 assessments, such as sucking behavior. While contradictory findings have been obtained,<sup>26</sup> a  
33  
34 recent longitudinal study also showed interesting evidence that some sucking behaviors in  
35  
36 preterm infants are associated with later abnormal neurodevelopmental outcomes at the age  
37  
38 of 2 years.<sup>27</sup> As such, further research on the development of screening tools for early  
39  
40 intervention is needed.  
41  
42  
43  
44  
45  
46  
47  
48

49  
50 The JECS-A was established in 2011 as a sub-cohort of the JECS and has three main  
51  
52 objectives: (1) to clarify the effects of prenatal and postnatal chemical exposures and social  
53  
54 stressors on pregnant women and/or their children, especially neurodevelopmental outcomes  
55  
56 of the children; (2) to develop a biomonitoring method using urine samples extracted from  
57  
58 diapers for measuring internal exposure to chemical substances; and (3) to develop secondary  
59  
60

1  
2  
3  
4 tools such as the 2D:4D ratio or neonatal oral-motor assessments to screen future  
5  
6 neurodevelopmental problems at earlier stages of childhood. This article outlines the JECS-A  
7  
8 and its baseline data to date.  
9

## 10 11 12 13 **COHORT DESCRIPTION**

### 14 15 16 **Setting**

17  
18 The JECS is an ongoing nationwide birth cohort study with a total of 100,000 children and  
19  
20 their parents (father's participation is optional, but suggested) across 15 regions in Japan.<sup>28 29</sup>  
21  
22  
23 <sup>30</sup> To identify risk factors in the environment affecting children's growth and health, the  
24  
25 participating children are being followed from their fetal stage until the age of 13 years. The  
26  
27 JECS has 15 regional sub-cohorts. At Aichi Regional Center of the JECS, an  
28  
29 interdisciplinary team composed of toxicologists, psychologists, epidemiologists, public  
30  
31 health specialists, pediatricians, obstetricians and gynecologists, biostatisticians, and  
32  
33 ergonomists designed the JECS-A as part of the JECS cohort. The study areas (**Figure 1**)  
34  
35 covered by the Aichi Regional Center of the JECS consist of Ichinomiya City (population of  
36  
37 387,000 in 2012) and Kita-ward in Nagoya City (population of 165,000 in 2012). Nagoya  
38  
39 City consists of 16 wards with a population of over 2 million and is Japan's third largest  
40  
41 industrial metropolis, next to Tokyo and Osaka. Kita-ward is in the northern part of Nagoya  
42  
43 City. Ichinomiya City neighbors Nagoya City and traditionally was known as an area  
44  
45 involved in textile production but is now a regional commercial and residential area with a  
46  
47 mixed economy of manufacturing and agriculture. Both areas are relatively urban and widely  
48  
49 known in the automobile and ceramics industries.  
50  
51  
52  
53  
54  
55

### 56 57 **Enrollment strategy**

58  
59 **Figure 2** shows a flowchart depicting each stage of study recruitment. A  
60

1  
2  
3  
4 community-based recruitment strategy was adopted at designated 32 obstetric facilities  
5  
6 including hospitals, clinics or midwifery units providing medical care for pregnant women in  
7  
8 the study areas. The participants living in the areas can reach any of the 32 facilities within  
9  
10 30 minutes by car or public transportation such as subway or train. Women in the early stage  
11  
12 of pregnancy who visited an obstetrics facility for prenatal health care were invited to  
13  
14 participate in the JECS if they met the following criteria: (1) residence within the study  
15  
16 areas, (2) an estimated delivery date after August 2011, and (3) an ability to read and write  
17  
18 the Japanese language so as to complete the self-administered questionnaire. In addition to  
19  
20 this recruitment, we asked public health centers of the local governments to help us approach  
21  
22 hard-to-reach groups such as low socio-economic status (SES) or reluctant pregnant women.  
23  
24 All pregnant women receive the Maternal and Child Health Handbook at the public health  
25  
26 centers to get complimentary municipal maternal care for pregnancy, delivery, and childcare  
27  
28 under the Maternal and Child Health Law in Japan. Taking advantages of the occasions  
29  
30 enabling face-to-face communication with all pregnant women in the study area, our staffs  
31  
32 carefully explained the importance of the JECS to them and requested their cooperation for  
33  
34 the study at the obstetric facilities.  
35  
36  
37  
38  
39  
40  
41

42  
43 Of the 8,134 pregnant women who were invited as eligible recruits during the recruitment  
44  
45 period from January 2011 to March 2014, a total of 5,721 (70.3%) participants from  
46  
47 cooperating 32 obstetrics facilities were enrolled as the baseline regional cohort of pregnant  
48  
49 women for main study of the JECS. The study area has 4,400 pregnant women annually on  
50  
51 average, suggesting that 5,721 participants accounted for about 40% of the target population  
52  
53 in the area.  
54  
55

56  
57 After the recruitment to the main study of the JECS, the registered 5,721 JECS participants  
58  
59 were also invited to participate in adjunct studies conducted solely in the JECS-A and asked  
60

1  
2  
3  
4 if they could provide any of the following three types of consent: agreement to complete the  
5  
6 adjunct questionnaire survey only (Sub-cohort A1, n = 3,426), agreement to provide maternal  
7  
8 biological specimens in addition to agreeing to participate in Sub-cohort A1 (Sub-cohort A2,  
9  
10 n = 2,924), and agreement to undergo genetic analyses in addition to agreeing to participate  
11  
12 in Sub-cohorts A1 and A2 (Sub-cohort A3, n = 1,753). Sub-cohorts A1, A2 and A3 were  
13  
14 designed as a hierarchy, that is, the participants in sub-cohort A3 agreed to participate in  
15  
16 studies conducted in sub-cohorts A1 and A2. Each participant in the adjunct studies gave  
17  
18 written informed consent before any surveys began.  
19  
20  
21  
22

23 Adjunct questionnaires for Sub-cohort A1 were distributed three times at the obstetric  
24  
25 facilities during 1st and 2nd/3rd trimesters, in principle, and one month after the delivery,  
26  
27 and mailed thereafter. Selective attrition caused by low SES may result in the estimates of  
28  
29 findings being biased <sup>31</sup>, so that enrollment and retention strategies play an important role in  
30  
31 longitudinal cohort studies. We sent 1,000 Japanese yen (JPY, 110 JPY = 1US\$ as of 2019)  
32  
33 worth of a prepaid card for every adjunct mail survey as monetary incentive to respondents.  
34  
35 The prepaid card called 'Quo card' is familiar and can be used at all kinds of restaurants,  
36  
37 convenience stores, gas stations, bookstores etc. in Japan. In addition to the monetary  
38  
39 incentives to participate, we also conducted reminder calls or letters to retain participants  
40  
41 who were likely to drop out of the study, focusing on non-respondents of the postal surveys.  
42  
43  
44  
45  
46

47 In Sub-cohorts A2 and A3, the parental blood (up to 1.5 ml) and urine (up to 50 ml,  
48  
49 mothers only) during 1st and 2nd/3rd trimesters in principle and the cord blood (up to 1.5 ml)  
50  
51 were collected and stored at around -80 °C. Participants in the JECS-A were then followed  
52  
53 regardless of whether or not they took part in the above adjunct studies. Subsequently, of the  
54  
55 5,555 children, including 49 pairs of twins, born from the enrolled mothers, 57 children  
56  
57 dropped out of the JECS-A because of infant death (n = 7), mother death (n = 1), withdrawal  
58  
59  
60

1  
2  
3  
4 of consent (n = 48), or a change in residence to an area outside the surveyed area (n = 1). On  
5  
6 the other hand, 4 children who moved into the surveyed area from another one were included.  
7  
8 As of 18 months after delivery, a total of 5,502 children remained within the JECS-A,  
9  
10 accounting for approximately 40% of the children born in the study area.  
11  
12

13  
14 A second recruitment for the adjunct studies in the JECS-A was also conducted during the  
15  
16 follow-up of the study participants of the main study of the JECS, focusing on children. We  
17  
18 approached the guardians of targeted children at legal check-ups for 18-month-olds provided  
19  
20 at regional public health centers and health consultation centers. The recruitment period was  
21  
22 divided into two phases. Of the 5,502 children remaining in the JECS-A at 18 months of age,  
23  
24 a total of 2,576 children had reached the age until June 2015. We conducted a survey of the  
25  
26 anthropometric measurements of the 2D:4D ratio of the children on both hands (Sub-cohort  
27  
28 B). A total of 1,357 children (coverage of target samples: 52.7%, consent rate: 99.0%) were  
29  
30 enrolled in Sub-cohort B. Subsequent to this recruitment, another recruitment was also set for  
31  
32 18-month-old children born from mothers registered during the last year of the pregnant  
33  
34 women recruitment (Sub-cohort C). This cohort was specifically planned to collect biological  
35  
36 samples (mainly overnight urine) from diapers, and written informed consent for  
37  
38 participation of 1,192 children (82.9%) of the adjunct survey was obtained from their  
39  
40 guardians. All the enrolled children had reached the age of 1.5 years as of June 2016. The  
41  
42 follow-up schedule for children beyond the age of 3 years has yet to be finalized, but these  
43  
44 sub-cohorts within the JECS-A will be followed until the children reach the age of 13 years.  
45  
46 Informed parental consent from the legally authorized representative was obtained for all the  
47  
48 enrollment of children in the studies. Note that the above figures were based on the data set  
49  
50 `jecs-ag-20160424`, which was released in June 2016, and on the provisional data set  
51  
52 determined as of August 1, 2018.  
53  
54  
55  
56  
57  
58  
59  
60

## Patient and Public Involvement

To develop the JECS-A cohort, we have established a system for public involvement in research, organizing an annual advisory committee consisting of the representatives from local government, medical association, nursing association, women's group, lawyers and mass media. The role of the committee offers advice and research questions from public concern, as members of an external project supporting group. Moreover, the committee has great contribution not only to sharing knowledge or engaging and creating a dialogue with the public, but also to playing a valuable role in advising on recruitment of participants and suggesting ideas for conducting the research. We also have held an open lecture for the participants every year since 2012, as an opportunity in which information and knowledge about the research is provided and disseminated.

## Data collection and measurements for adjunct studies of the JECS-A

The data collected for the adjunct studies in the JECS-A are summarized in **Table 1**. Data acquisition for some socio-demographics and neurodevelopmental outcomes was planned within the main study of the JECS.

Each of sub-cohorts in JECS-A was designed for the three main objectives as stated in the Introduction. First, to challenge the multifaceted problems surrounding children's development, Sub-cohort A1 was formed with the intention of collecting data on longitudinal changes in prenatal and postnatal exposures considered to affect neurodevelopmental outcomes. One of our special concerns is the effect of alexithymia in mothers on early child development. The 20-item Toronto Alexithymia Scale (TAS-20)<sup>32</sup> will be used to measure this trait as a primary factor, and studies will investigate the pregnancy and perinatal



1  
2  
3  
4 outcomes and/or the developmental outcomes of postnatal infants. As there are many  
5  
6 potential determinants extending from the prenatal to early childhood period, the risks will  
7  
8 be estimated using the mother's and child's demographic variables or other related factors as  
9  
10 confounding factors. Sub-cohorts A2 and A3 will mainly focus on studies using biological  
11  
12 specimens (urine and/or blood) obtained from pregnant women and their spouses when  
13  
14 available. These biological samples will be used for exposure assessments, genetic and  
15  
16 epigenetic analyses, and activity determinations of chemical metabolism-related enzymes,  
17  
18 and so on. Data on the levels of urinary exposure biomarkers including chemical metabolites  
19  
20 will be combined with those in sub-cohort C and, eventually, the longitudinal exposure  
21  
22 trajectory and the relationships between exposure and health outcomes will also be analyzed.  
23  
24 Second, Sub-cohort C was designed to clarify the chemical exposure levels in toddlers. To  
25  
26 estimate their amount of exposure to environmental chemicals, a noninvasive biomonitoring  
27  
28 approach was adopted in which a paper diaper worn overnight was collected under  
29  
30 refrigerated conditions at the age of 18 and 36 months. This cohort will also be used to  
31  
32 derive human biomonitoring reference values (e.g., RV95) of urinary chemical  
33  
34 concentrations in the Japanese children.  
35  
36  
37  
38  
39  
40  
41

42  
43 Third, sub-cohort B was designed to develop secondary tools such as the 2D:4D ratio or  
44  
45 neonatal oral-motor assessments to screen future neurodevelopmental problems at earlier  
46  
47 stages of childhood. One of our major interest is the lengths of digits on both hands in  
48  
49 children especially the longitudinal changes in 2D:4D ratios between 18-month-old and  
50  
51 36-month-old infants. As for the anthropometric measurements of the palms and digits of the  
52  
53 children's hands, we have established a specialized protocol involving photographic records  
54  
55 and digit measurements that has a high reliability (Intra/Inter-Class Correlations:  $ICC_1 = 0.97$   
56  
57 [95% CI, 0.87-0.99],  $ICC_3 = 0.93$  [0.83-0.98]). In short, our easy-to-use photocopying  
58  
59  
60

1  
2  
3  
4 method, which involves placing the child's palm on a box composed of transparent acrylic  
5  
6 thin plates and photographing it with a digital camera fixed inside the box, was devised for  
7  
8 application in health checkup settings enforced by law. All the 2D:4D ratio data will be  
9  
10 obtained using this protocol. Sub-cohort A1 will also be used to examine the relationship  
11  
12 between neonatal oral-motor assessments and subsequent abnormal neurodevelopmental  
13  
14 outcomes. Using the short version of Infant Behavior Questionnaire (IBQ) and Early  
15  
16 Childhood Behavior Questionnaire (ECBQ) as factors reflecting temperamental  
17  
18 self-regulation, the utility of such assessments as early screening tools for predicting  
19  
20 subsequent neurodevelopmental outcomes will be verified.  
21  
22  
23  
24

25  
26 The JECS-A do not include any information regarding medical diagnoses affecting  
27  
28 neurodevelopmental outcomes at this time, but such information will be available in the  
29  
30 future through the main study of the JECS, which is being conducted under the same protocol  
31  
32 across 15 regions in Japan.  
33  
34  
35  
36

## 37 38 **FINDINGS TO DATE**

### 39 40 **Participant characteristics of pregnant women**

41  
42 **Table 2** shows the main socio-demographic characteristics of the pregnant women. To  
43  
44 ascertain whether the JECS-A baseline profiles are representative of the pregnant women in  
45  
46 the study areas in general, the national statistics for Aichi prefecture including Nagoya City  
47  
48 and Ichinomiya City (since data for each city were not available) were included in the table.  
49  
50 Similar distribution trends for variables such as "Age at delivery" were confirmed when the  
51  
52 JECS-A baseline cohort of pregnant women and the national statistics were compared;  
53  
54 however, differences in "Education level" and "Household income" were observed.  
55  
56  
57  
58  
59 Regarding education level, the percentage of JECS participants who had graduated from high  
60

1  
2  
3  
4 school was relatively low, compared with the national statistics (25.1% vs. 39.7%), while the  
5  
6 percentage of college/junior college/technology college students was higher among the JECS  
7  
8 participants, compared with the national statistics (35.3% vs. 20.8%). Moreover, the number  
9  
10 of JECS-A participants with a household income of 2 million yen or less was about 1/8 of the  
11  
12 national statistics. Likewise, unemployed participants (mainly housewives) accounted for  
13  
14 45% of the JECS-A cohort. These results suggest a possible selection bias. We recruited  
15  
16 pregnant women who had visited the obstetric facilities during the daytime; this might have  
17  
18 resulted in a lower study participation rate among pregnant employees.  
19  
20  
21  
22  
23  
24  
25

### 26 **Participant characteristics of children**

27  
28 As for the baseline cohort of children, a total of 5,502 (99.0%) of the 5,555 children  
29  
30 remained in the JECS-A at 18 months after delivery (provisional figures as of August 1,  
31  
32 2018). **Table 3** compares the baseline data of the newborns with the national statistics. Basic  
33  
34 demographics including “Sex”, “Birth weight” and “Birth height” had similar distributions,  
35  
36 indicating the representativeness of the sample.  
37  
38  
39

40 Similarly, **Table 4** shows the fundamental characteristics of the pregnant women and their  
41  
42 children in each sub-cohort of the JECS-A. No notable differences in the descriptive  
43  
44 statistics were observed among the sub-cohorts. Furthermore, the drop-out rates for each  
45  
46 sub-cohort, to date, have been maintained at less than 10% relative to the baseline. However,  
47  
48 10% of the sub-cohort values for household income are missing because many participants  
49  
50 did not provide information on the income. Therefore, caution is needed when using this  
51  
52 variable as a confounding factor in multiple regression analyses.  
53  
54  
55  
56  
57  
58  
59

## 60 **STRENGTHS AND LIMITATIONS**

1  
2  
3  
4 The main strength of the JECS-A of children is its large sample size, reflecting a  
5  
6 representative population. Approximately 40% of the children born in the study area have  
7  
8 been included in the study to date. The participating children will be followed until they  
9  
10 reach the age of 13 years. The study protocol<sup>33</sup> of the JECS decided on a target retention rate  
11  
12 of 80% or higher at the age of 13 years. The linkage between the JECS-A sub-cohort and the  
13  
14 main data of the JECS study will further allow novel and challenging studies with a high  
15  
16 generalizability.  
17  
18  
19

20  
21 The main weakness of the JECS-A cohort concerns the pregnant women participants  
22  
23 related to a selective attrition. A relatively large proportion of single-income, middle-class  
24  
25 households were included in the JECS-A; many low-income households refused to  
26  
27 participate in the surveys, and some participants did not provide information concerning their  
28  
29 household income. As enrollment strategies, though we set about recruiting from the first  
30  
31 trimester of pregnancy (<12-week gestation), it was hard to get their cooperation in earlier  
32  
33 weeks of a pregnancy, when the risk of miscarriage is higher. Most of pregnant women  
34  
35 registered were actually after 10th week of pregnancy. Furthermore, we had no choice but to  
36  
37 call on pregnant women for participation who had visited the obstetric facilities mainly  
38  
39 during the daytime, owing to limited number of staffs during the evening shift at hospitals.  
40  
41 Employed participants including all non-regular employees (part-time, temporary or contract  
42  
43 employees) only accounted for 33% in the group of annual household income with 2 million  
44  
45 Japanese yen or less. This means a selective attrition that working pregnant women of low  
46  
47 SES might have been excluded in the cohorts. Such family socioeconomic status will have  
48  
49 possibilities affecting several outcomes related to child development such as breastfeeding  
50  
51 duration <sup>34</sup>, obesity in children <sup>35</sup> and child maltreatment <sup>36</sup>. A British study <sup>37</sup>, however,  
52  
53 suggests that cognitive and behavioural development has a weak or absent direct effect of  
54  
55  
56  
57  
58  
59  
60

1  
2  
3  
4 income inequality after controlling potential confounders. Thus, possible biases as a result of  
5  
6 selective attrition and direct SES effects for child should be carefully examined in future  
7  
8 studies when using the JECS-A cohort data. The impact of the missing values can be adjusted  
9  
10 to some extent by comparing estimates resulting from the multiple imputation and from  
11  
12 complete case analysis, using the data of main study of the JECS as reference. However,  
13  
14 researchers must take into account the effect of response biases when conducting statistical  
15  
16 analyses using paired data for pregnant women and their children and when interpreting these  
17  
18 results.  
19  
20  
21  
22  
23  
24

## 25 **COLLABORATION**

26  
27  
28 The original data and specimens will be made available to investigators and stakeholders  
29  
30 working within the JECS-A project. The study must adhere to the JECS policy on the  
31  
32 availability of research results, publications, intellectual property rights, and data sharing. At  
33  
34 the moment, the Ethical Guidelines for Medical and Health Research Involving Human  
35  
36 Subjects enforced by the Japan Ministry of Education, Culture, Sports, Science and  
37  
38 Technology and the Ministry of Health, Labour and Welfare restrict the open sharing of  
39  
40 epidemiologic data. This means that researchers interested in using the data must collaborate  
41  
42 with and participate in the JECS-A project. This project was recently started and is still  
43  
44 ongoing. We are open to new proposals that fall within the nature of the JECS-A cohort.  
45  
46  
47  
48  
49  
50

## 51 **Acknowledgements**

52  
53  
54 We would like to express our gratitude to all the JECS-A cohort participants. We also  
55  
56 express our sincere appreciation to the collaborating hospitals, clinics, local healthcare  
57  
58 centers, local government agencies in Nagoya City and Ichinomiya City, and the JECS-A  
59  
60

1  
2  
3  
4 staff members for their continuous assistance in promoting this study. The authors also  
5  
6 specially thank Takaaki Hiraiwa, Hiroki Yoshizoe, Maiko Miyata, Hirohisa Kano and  
7  
8 Takahiro Kurihara for the data management and their assistance in the data analysis.  
9

## 10 11 12 13 **Contributors**

14  
15  
16 TE designed the JECS-A cohort architecture, developed the protocol, analyzed the data,  
17  
18 and wrote the first draft of the manuscript. YY and MT organized the study team, obtained  
19  
20 approvals and contributed to the development of the protocol, design, and data collection  
21  
22 tools. T<sub>Om</sub> was in charge of coordination with relevant organizations and organized the  
23  
24 JECS-A members. NS, SK, T<sub>Ma</sub> and T<sub>Og</sub> performed the analysis and interpreted the data.  
25  
26 YI, HS, NO and JU designed and developed the protocol for the JECS-A sub-cohorts A2, A3  
27  
28 and B and edited and analyzed the data. AN, M<sub>Ko</sub>, YO, T<sub>Mi</sub>, S<sub>Su</sub>, M<sub>SO</sub> and S<sub>Sa</sub> designed  
29  
30 each adjunct study, supervised the data collection, and drafted the manuscript. M<sub>Ka</sub> was a  
31  
32 member of the JECS Steering Committee, was responsible for the study design and protocol,  
33  
34 supervised the data collection, and edited and drafted the manuscript. All the authors  
35  
36 interpreted the data, contributed to the writing of the manuscript, revised it critically for  
37  
38 important intellectual content, and agreed with the final version and the findings.  
39  
40  
41  
42  
43  
44  
45  
46  
47  
48  
49  
50  
51  
52  
53  
54  
55  
56  
57  
58  
59  
60

**Funding** The Japan Environment and Children's Study was funded by the Ministry of the  
Environment, Japan. This work was also supported by grants from the Environment Research  
and Technology Development Fund (ERTDF, No 5-1551 and 5-1851), Japan Society for the  
Promotion of Science (JSPS) KAKENHI Grant Number 16H03733, 25293151, 25285185,  
19H01078 and Grants-in-aid for research of Nagoya City University (2011-6, 2012-4,  
2013-2, 2013-10, 2014-4, 2015-10, 2016-4).

1  
2  
3  
4  
5  
6 **Competing Interests** None declared  
7  
8  
9

10  
11 **Ethical approval** This study was approved by the Review Board of the Ministry of the  
12 Environment, by the Institutional Review Board of Nagoya City University Graduate School  
13 of Medical Sciences (No. 70-00-0134; No. 00000544-6, 00000574-2).  
14  
15

16  
17  
18  
19  
20  
21 **Data sharing statement** The original data and specimens will be made available to  
22 investigators and stakeholders working within the JECS-A project.  
23

24  
25 Researchers interested in collaborations or further information should contact the JECS-A  
26 secretariat by e-mail at [eisei@med.nagoya-cu.ac.jp](mailto:eisei@med.nagoya-cu.ac.jp).  
27  
28

29  
30  
31  
32  
33 **Disclaimer** The findings and conclusions of this article are solely the responsibility of the  
34 authors and do not represent the official views of the Japanese government.  
35  
36

## 37 38 39 40 41 42 **REFERENCES**

- 43  
44  
45 1. Ishitsuka K, Nakayama SF, Kishi R, et al. Japan Environment and Children's Study:  
46 backgrounds, activities, and future directions in global perspectives. *Environ Health*  
47 *Prev Med* 2017;22(1):61. doi: 10.1186/s12199-017-0667-y  
48  
49  
50  
51  
52 2. American Psychiatric Association. Diagnostic and Statistical Manual of Mental Disorders  
53 (DSM-5): American Psychiatric Association Publishing 2013:xiii-xv.  
54  
55  
56  
57 3. Xiang S, Carrie A. A review of the prevalence of Autism Spectrum Disorder in Asia,  
58  
59  
60 Research in Autism Spectrum Disorders. *Autism Spectrum Disorders*

- 2010;4(2):156-67. doi: <http://dx.doi.org/10.1016/j.rasd.2009.10.003>.
4. Hansen SN, Schendel DE, Parner ET. Explaining the increase in the prevalence of autism spectrum disorders: the proportion attributable to changes in reporting practices. *JAMA Pediatr* 2015;169(1):56-62. doi: 10.1001/jamapediatrics.2014.1893
  5. Rodriguez-Barranco M, Lacasana M, Aguilar-Garduno C, et al. Association of arsenic, cadmium and manganese exposure with neurodevelopment and behavioural disorders in children: a systematic review and meta-analysis. *Sci Total Environ* 2013;454-455:562-77. doi: 10.1016/j.scitotenv.2013.03.047
  6. Rodrigues EG, Bellinger DC, Valeri L, et al. Neurodevelopmental outcomes among 2- to 3-year-old children in Bangladesh with elevated blood lead and exposure to arsenic and manganese in drinking water. *Environ Health* 2016;15:44. doi: 10.1186/s12940-016-0127-y
  7. Melchior M, Hersi R, van der Waerden J, et al. Maternal tobacco smoking in pregnancy and children's socio-emotional development at age 5: The EDEN mother-child birth cohort study. *Eur Psychiatry* 2015;30(5):562-8. doi: 10.1016/j.eurpsy.2015.03.005
  8. Joelsson P, Chudal R, Talati A, et al. Prenatal smoking exposure and neuropsychiatric comorbidity of ADHD: a finnish nationwide population-based cohort study. *BMC Psychiatry* 2016;16:306. doi: 10.1186/s12888-016-1007-2
  9. Han JY, Kwon HJ, Ha M, et al. The effects of prenatal exposure to alcohol and environmental tobacco smoke on risk for ADHD: a large population-based study. *Psychiatry Res* 2015;225(1-2):164-8. doi: 10.1016/j.psychres.2014.11.009
  10. Padron A, Galan I, Garcia-Esquinas E, et al. Exposure to secondhand smoke in the home and mental health in children: a population-based study. *Tob Control* 2016;25(3):307-12. doi: 10.1136/tobaccocontrol-2014-052077



- 1  
2  
3  
4 11. Polanska K, Ligocka D, Sobala W, et al. Phthalate exposure and child development: the  
5  
6 Polish Mother and Child Cohort Study. *Early Hum Dev* 2014;90(9):477-85. doi:  
7  
8 10.1016/j.earlhumdev.2014.06.006  
9
- 10  
11 12. Kyriklaki A, Vafeiadi M, Kampouri M, et al. Prenatal exposure to persistent organic  
12  
13 pollutants in association with offspring neuropsychological development at 4years of  
14  
15 age: The Rhea mother-child cohort, Crete, Greece. *Environ Int* 2016;97:204-11. doi:  
16  
17 10.1016/j.envint.2016.09.012  
18
- 19  
20 21 13. Goudarzi H, Nakajima S, Ikeno T, et al. Prenatal exposure to perfluorinated chemicals  
22  
23 and neurodevelopment in early infancy: The Hokkaido Study. *Sci Total Environ*  
24  
25 2016;541:1002-10. doi: 10.1016/j.scitotenv.2015.10.017  
26  
27
- 28 28 14. Yolton K, Cornelius M, Ornoy A, et al. Exposure to neurotoxicants and the development  
29  
30 of attention deficit hyperactivity disorder and its related behaviors in childhood.  
31  
32 *Neurotoxicol Teratol* 2014;44:30-45. doi: 10.1016/j.ntt.2014.05.003  
33  
34
- 35 35 15. Engel SM, Wetmur J, Chen J, et al. Prenatal exposure to organophosphates, paraoxonase  
36  
37 1, and cognitive development in childhood. *Environ Health Perspect*  
38  
39 2011;119(8):1182-8. doi: 10.1289/ehp.1003183  
40  
41
- 42 42 16. Bouchard MF, Chevrier J, Harley KG, et al. Prenatal exposure to organophosphate  
43  
44 pesticides and IQ in 7-year-old children. *Environ Health Perspect*  
45  
46 2011;119(8):1189-95. doi: 10.1289/ehp.1003185  
47  
48
- 49 49 17. Stein LJ, Gunier RB, Harley K, et al. Early childhood adversity potentiates the adverse  
50  
51 association between prenatal organophosphate pesticide exposure and child IQ: The  
52  
53 CHAMACOS cohort. *Neurotoxicology* 2016;56:180-87. doi:  
54  
55 10.1016/j.neuro.2016.07.010  
56  
57
- 58 58 18. Yurumez E, Akca OF, Ugur C, et al. Mothers' alexithymia, depression and anxiety levels  
59  
60

- 1  
2  
3  
4 and their association with the quality of mother-infant relationship: a preliminary  
5  
6 study. *Int J Psychiatry Clin Pract* 2014;18(3):190-6. doi:  
7  
8 10.3109/13651501.2014.940055  
9  
10  
11 19. Li Y, Jiang WQ, Du YS, et al. Relationships between behavioral symptoms of  
12  
13 non-medicated Chinese children with attention deficit hyperactivity disorder and  
14  
15 parenting stress: Comparison of different subtypes and comorbidities. *Asia Pac*  
16  
17 *Psychiatry* 2016;8(2):127-35. doi: 10.1111/appy.12213  
18  
19  
20  
21 20. Oya N, Ito Y, Hioki K, et al. Quantitative analysis of organophosphate insecticide  
22  
23 metabolites in urine extracted from disposable diapers of toddlers in Japan. *Int J Hyg*  
24  
25 *Environ Health* 2017;220(2 Pt A):209-16. doi: 10.1016/j.ijheh.2016.10.009  
26  
27  
28 21. Saito S, Ueyama J, Kondo T, et al. A non-invasive biomonitoring method for assessing  
29  
30 levels of urinary pyrethroid metabolites in diapered children by gas  
31  
32 chromatography-mass spectrometry. *J Expo Sci Environ Epidemiol* 2014;24(2):200-7.  
33  
34 doi: 10.1038/jes.2013.31  
35  
36  
37 22. Robins DL, Casagrande K, Barton M, et al. Validation of the modified checklist for  
38  
39 Autism in toddlers, revised with follow-up (M-CHAT-R/F). *Pediatrics*  
40  
41 2014;133(1):37-45. doi: 10.1542/peds.2013-1813  
42  
43  
44 23. Manning JT, Baron-Cohen S, Wheelwright S, et al. The 2nd to 4th digit ratio and autism.  
45  
46 *Dev Med Child Neurol* 2001;43(3):160-4.  
47  
48  
49 24. Teatero ML, Netley C. A critical review of the research on the extreme male brain theory  
50  
51 and digit ratio (2D:4D). *J Autism Dev Disord* 2013;43(11):2664-76. doi:  
52  
53 10.1007/s10803-013-1819-6  
54  
55  
56 25. Guyatt AL, Heron J, Knight Ble C, et al. Digit ratio and autism spectrum disorders in the  
57  
58 Avon Longitudinal Study of Parents and Children: a birth cohort study. *BMJ Open*  
59  
60

- 2015;5(8):e007433. doi: 10.1136/bmjopen-2014-007433
26. Slattery J, Morgan A, Douglas J. Early sucking and swallowing problems as predictors of neurodevelopmental outcome in children with neonatal brain injury: a systematic review. *Dev Med Child Neurol* 2012;54(9):796-806. doi: 10.1111/j.1469-8749.2012.04318.x
27. Wolthuis-Stigter MI, Luinge MR, da Costa SP, et al. The association between sucking behavior in preterm infants and neurodevelopmental outcomes at 2 years of age. *J Pediatr* 2015;166(1):26-30. doi: 10.1016/j.jpeds.2014.09.007
28. Kawamoto T, Nitta H, Murata K, et al. Rationale and study design of the Japan environment and children's study (JECS). *BMC Public Health* 2014;14:25. doi: 10.1186/1471-2458-14-25
29. Michikawa T, Nitta H, Nakayama SF, et al. The Japan Environment and Children's Study (JECS): A Preliminary Report on Selected Characteristics of Approximately 10 000 Pregnant Women Recruited During the First Year of the Study. *J Epidemiol* 2015;25(6):452-8. doi: 10.2188/jea.JE20140186
30. Michikawa T, Nitta H, Nakayama SF, et al. Baseline Profile of Participants in the Japan Environment and Children's Study (JECS). *J Epidemiol* 2018;28(2):99-104. doi: 10.2188/jea.JE20170018
31. Booker CL, Harding S, Benzeval M. A systematic review of the effect of retention methods in population-based cohort studies. *BMC Public Health* 2011;11:249. doi: 10.1186/1471-2458-11-249
32. Moriguchi Y, Maeda M, Igarashi T, et al. Age and gender effect on alexithymia in large, Japanese community and clinical samples: a cross-validation study of the Toronto Alexithymia Scale (TAS-20). *Biopsychosoc Med* 2007;1:7. doi:

1  
2  
3  
4 10.1186/1751-0759-1-7  
5

- 6 33. National Centre for Japan Environment and Children's study. Japan Environment and  
7  
8 Children's study (JECS), Study Protocol (ver. 1.4) [Available from:  
9  
10 [https://www.env.go.jp/en/chemi/hs/jecs/data/about/jecs-study\\_protocol\\_14\\_en.pdf](https://www.env.go.jp/en/chemi/hs/jecs/data/about/jecs-study_protocol_14_en.pdf).  
11  
12
- 13 34. Flacking R, Nyqvist KH, Ewald U. Effects of socioeconomic status on breastfeeding  
14  
15 duration in mothers of preterm and term infants. *Eur J Public Health*  
16  
17 2007;17(6):579-84. doi: 10.1093/eurpub/ckm019  
18  
19
- 20 35. Ogden CL, Lamb MM, Carroll MD, et al. Obesity and socioeconomic status in children  
21  
22 and adolescents: United States, 2005-2008. *NCHS Data Brief* 2010(51):1-8.  
23  
24
- 25 36. Eckenrode J, Smith EG, McCarthy ME, et al. Income inequality and child maltreatment  
26  
27 in the United States. *Pediatrics* 2014;133(3):454-61. doi: 10.1542/peds.2013-1707  
28  
29
- 30 37. Violato M, Petrou S, Gray R, et al. Family income and child cognitive and behavioural  
31  
32 development in the United Kingdom: does money matter? *Health Econ*  
33  
34 2011;20(10):1201-25. doi: 10.1002/hec.1665  
35  
36  
37  
38  
39  
40  
41  
42  
43  
44  
45  
46  
47  
48  
49  
50  
51  
52  
53  
54  
55  
56  
57  
58  
59  
60

1  
2  
3  
4  
5  
6  
7  
8  
9  
10  
11  
12  
13  
14  
15  
16  
17  
18  
19  
20  
21  
22  
23  
24  
25  
26  
27  
28  
29  
30  
31  
32  
33  
34  
35  
36  
37  
38  
39  
40  
41  
42  
43  
44  
45  
46  
47  
48  
49  
50  
51  
52  
53  
54  
55  
56  
57  
58  
59  
60

Figure legend/caption

Figure 1 Study areas covered by the JECS-A

Figure 2. Flowchart showing each stage of study recruitment for adjunct studies in the JECS-A

For peer review only

**Table 1** Summary of measurements collected for the adjunct studies conducted in JECS-A

| Main items                             | Sub-cohort covered                                                                        |    |    |   |   | Timing of measurement |         |                                |     |      |      |      |
|----------------------------------------|-------------------------------------------------------------------------------------------|----|----|---|---|-----------------------|---------|--------------------------------|-----|------|------|------|
|                                        | A1                                                                                        | A2 | A3 | B | C | prenatal (trimester)  |         | postnatal (months after birth) |     |      |      |      |
|                                        |                                                                                           |    |    |   |   | 1st                   | 2nd/3rd | 1 m                            | 6 m | 18 m | 24 m | 36 m |
| <b>Pregnant women</b>                  |                                                                                           |    |    |   |   |                       |         |                                |     |      |      |      |
| <b>Risk and confounding factors</b>    |                                                                                           |    |    |   |   |                       |         |                                |     |      |      |      |
| <b>Socio-demographic</b>               | Age, Maternal age, Marital status, Household income, Education level                      |    |    |   |   | ○                     | ○       | ○                              | ○   | ○    | ○    | ○    |
| <b>Lifestyle</b>                       | Smoking, Second-hand smoking, Drinking habits, Dietary status, Sleeping habits            |    |    |   |   | ○                     | ○       | ○                              | ○   | ○    | ○    | ○    |
| <b>Psychological and psychiatric</b>   | TAS-20                                                                                    |    |    |   |   | ●                     | ●       | ●                              |     |      |      |      |
|                                        | POMS-SF                                                                                   |    |    |   |   | ●                     | ●       |                                |     |      |      |      |
|                                        | Readiness of Parenthood Scale                                                             |    |    |   |   | ●                     | ●       | ●                              | ●   |      |      |      |
| <b>Obstetric</b>                       | History of pregnancy, infertility treatment, prenatal diagnosis and gestational duration  |    |    |   |   | ○                     |         |                                |     |      |      |      |
| <b>Biomonitoring data</b>              | Urine (up to 50 ml, mothers only), parental blood (up to 1.5ml), cord blood (up to 1.5ml) |    |    |   |   |                       | ●       | ●                              | ●   | ●    |      |      |
| <b>Children</b>                        |                                                                                           |    |    |   |   |                       |         |                                |     |      |      |      |
| <b>Risk and confounding factors</b>    |                                                                                           |    |    |   |   |                       |         |                                |     |      |      |      |
| <b>Demographic</b>                     | Height, Weight, BMI, Sex                                                                  |    |    |   |   | ○                     | ○       | ○                              | ○   | ○    |      |      |
| <b>Behavioral</b>                      | Neonatal oral-motor assessment                                                            |    |    |   |   | ●                     |         | ●                              |     |      |      |      |
|                                        | DCDQ                                                                                      |    |    |   |   | ●                     |         |                                | ●   |      | ●    |      |
| <b>Childcare</b>                       | Breast feeding and weaning food status                                                    |    |    |   |   | ●                     |         |                                | ●   |      |      |      |
| <b>Psychological and psychiatric</b>   | Mary Rothbart's Temperament Questionnaires                                                |    |    |   |   | ●                     |         |                                |     |      |      |      |
|                                        | · IBQ-R-SF                                                                                |    |    |   |   |                       |         |                                | ●   |      |      |      |
|                                        | · ECBQ-SF                                                                                 |    |    |   |   |                       |         |                                |     |      | ●    |      |
| <b>Biomonitoring data</b>              | Overnight urine extracted from disposable diapers (up to 30ml)                            |    |    |   |   |                       |         |                                |     | ●    |      | ●    |
| <b>Anthropometric data</b>             | 2D:4D                                                                                     |    |    |   |   |                       |         |                                |     | ●    |      | ●    |
| <b>Outcome examples to be analyzed</b> |                                                                                           |    |    |   |   |                       |         |                                |     |      |      |      |
| <b>LBW</b>                             |                                                                                           | ○  | ○  |   |   |                       |         | ○                              |     |      |      |      |
| <b>ASD</b>                             | ○                                                                                         | ○  | ○  | ○ | ○ |                       |         |                                |     |      | ○    |      |
| <b>ADHD</b>                            | ○                                                                                         | ○  | ○  |   | ○ |                       |         |                                |     |      | ○    |      |

1  
2  
3  
4  
5  
6 ○: Refer to the main study of the Japan Environment and Children's Study (JECS), ●: Measurements conducting solely in the JECS-A  
7  
8  
9

10 **BMI**, body mass index; **TAS-20**, the 20-item Toronto Alexithymia Scale; **POMS-SF**, Short form of the Profile of Mood States; **IBQ-R-SF**, The Infant Behavior Questionnaire  
11 Revised Short Form; **ECBQ-SF**, Early Childhood Behavior Questionnaire Short Form; **DCDQ**, Developmental Coordination Disorder Questionnaire, **2D:4D**, the second to  
12 fourth digit ratio; **PARS**, Pervasive Developmental Disorders Autism Society Japan Rating Scale; **ASD**, autism spectrum disorder; **ADHD**, attention deficit hyperactivity  
13 disorder; **LBW**, low birth weight.  
14  
15

16 **Sub cohort A1**, Agreement on the adjunct questionnaire survey only; **Sub cohort A2**, Agreement on the adjunct questionnaire survey and provision of mother's  
17 biological specimen (blood and urine); **Sub cohort A3**, Agreement on the adjunct questionnaire survey and provision of mother's biological specimen (blood and urine)  
18 with genetic analyses; **Sub cohort B**, Informed consent obtained from guardians (legally acceptable representatives) for provision of child's biological specimen; **Sub**  
19 **cohort C**, Informed consent obtained from guardians (legally acceptable representatives) for anthropometry measurement on child hands  
20  
21  
22  
23  
24  
25  
26  
27  
28  
29  
30  
31  
32  
33  
34  
35  
36  
37  
38  
39  
40  
41  
42  
43  
44  
45  
46  
47  
48  
49  
50  
51  
52  
53  
54  
55  
56  
57  
58  
59  
60

For peer review only

**Table 2** Comparison of the J ECS-A baseline data with national statistics in Aichi prefecture for pregnant women: verification of representativeness of the sample

|                                              | J ECS-A baseline cohort of pregnant women (95% CI) | National statistics (Aichi pref.) |
|----------------------------------------------|----------------------------------------------------|-----------------------------------|
| <b>Pregnant women <sup>a</sup> (n)</b>       | 5721                                               | 65218                             |
| <b>Age at Delivery <sup>a</sup></b>          |                                                    |                                   |
| 15-19 (%)                                    | 0.7 (0.5-0.9)                                      | 1.3                               |
| 20-24                                        | 6.7 (6.0-7.3)                                      | 8.2                               |
| 25-29                                        | 25.3 (24.1-26.4)                                   | 28.3                              |
| 30-34                                        | 36.4 (35.1-37.6)                                   | 36.6                              |
| 35-39                                        | 23.2 (22.1-24.3)                                   | 21.4                              |
| 40-44                                        | 4.9 (4.4-5.5)                                      | 4.2                               |
| 45-49                                        | 0.1 (0.0-0.2)                                      | 0.1                               |
| 50-                                          | 0.0                                                | 0.0                               |
| Missing (n)                                  | 157                                                |                                   |
| <b>Education level <sup>b</sup> (n)</b>      |                                                    | 2397000                           |
| Junior high school/High school (%)           | 29.9 (28.7-31.1)                                   | 47.2                              |
| College/Junior college/Technology college    | 35.3 (34.1-36.6)                                   | 20.8                              |
| University                                   | 27.6 (26.4-28.8)                                   | 28.4                              |
| Graduate school                              | 1.6 (1.3-2.0)                                      | 3.6                               |
| Missing (n)                                  | 315                                                |                                   |
| <b>Household income <sup>b c d</sup> (n)</b> |                                                    | 3018900                           |
| <2,000 (%)                                   | 2.4 (2.0-2.8)                                      | 18.1                              |
| 2,000-<4,000                                 | 24.4 (23.3-25.5)                                   | 26.7                              |
| 4,000-<6,000                                 | 33.1 (31.9-34.3)                                   | 20.2                              |
| 6,000-<8,000                                 | 17.2 (16.2-18.2)                                   | 13.4                              |
| 8,000-<10,000                                | 7.4 (6.7-8.1)                                      | 8.3                               |
| ≥10,000                                      | 4.3 (3.7-4.8)                                      | 5.0                               |
| Missing (n)                                  | 643                                                |                                   |

<sup>a</sup> Data of Aichi prefecture as reference, provided by national vital statistics, Ministry of Health, Labour and Welfare in 2014.

<sup>b</sup> Data of Aichi prefecture provided by Ministry of Internal Affairs and Communications in 2012.

<sup>c</sup> Population of Aichi Prefecture including single-person households and families

<sup>d</sup> Household income shows thousand Japanese Yen(JPY), 110 JPY = 1US\$ as of 2019



1  
2  
3  
4  
5  
6  
7  
8  
9  
10  
11  
12  
13  
14  
15  
16  
17  
18  
19  
20  
21  
22  
23  
24  
25  
26  
27  
28  
29  
30  
31  
32  
33  
34  
35  
36  
37  
38  
39  
40  
41  
42  
43  
44  
45  
46  
47  
48  
49  
50  
51  
52  
53  
54  
55  
56  
57  
58  
59  
60

---

-: no available data provided; 95%CI: 95% Confidence Interval

For peer review only

**Table 3** Comparison of the J ECS-A baseline data with national statistics in Aichi prefecture for children: verification of representativeness of the sample

|                                            | J ECS-A baseline cohort of children (n = 5457) |                 |                 | National statistics (Aichi pref.) <sup>a</sup> |        |        |
|--------------------------------------------|------------------------------------------------|-----------------|-----------------|------------------------------------------------|--------|--------|
|                                            | Total                                          | Male            | Female          | Total                                          | Male   | Female |
| <b>Children (n)<sup>b</sup></b>            | 5457                                           | 2793            | 2659            | 65218                                          | 33649  | 31569  |
| <b>Sex (Singleton births)</b>              |                                                |                 |                 |                                                |        |        |
| (%)                                        |                                                | 51.2            | 48.7            |                                                | 51.6   | 48.4   |
| 95% CI                                     |                                                | (50.5-51.9)     | (48.0-49.4)     |                                                |        |        |
| Missing (n)                                | 5                                              |                 |                 |                                                |        |        |
| <b>Birth weight, g (Singleton births)</b>  |                                                |                 |                 |                                                |        |        |
| Mean                                       | 3034.3                                         | 3076.1          | 2990.7          | 3000.0                                         | 3040.0 | 2950.0 |
| 95%CI                                      | (3022.9-3045.7)                                | (3059.7-3092.5) | (2975.1-3006.3) | -                                              | -      | -      |
| Missing (n)                                | 43                                             | 23              | 16              |                                                |        |        |
| <b>Low birth weight (Singleton births)</b> |                                                |                 |                 |                                                |        |        |
| <2500 g (%)                                | 7.8                                            | 6.6             | 9.0             | 9.8                                            | 8.5    | 11.1   |
| 95%CI                                      | (7.4-8.2)                                      | (6.3-6.9)       | (8.7-9.3)       |                                                |        |        |
| Missing (n)                                | 43                                             | 23              | 16              |                                                |        |        |
| <b>Birth length, cm (Singleton births)</b> |                                                |                 |                 |                                                |        |        |
| Mean                                       | 49.7                                           | 49.9            | 49.5            | 49.3                                           | 49.6   | 49.1   |
| 95%CI                                      | (49.6-49.8)                                    | (49.8-50.0)     | (49.4-49.6)     | -                                              | -      | -      |
| Missing (n)                                | 51                                             | 28              | 19              |                                                |        |        |

1  
2  
3  
4  
5  
6  
7  
8  
9  
10  
11  
12  
13  
14  
15  
16  
17  
18  
19  
20  
21  
22  
23  
24  
25  
26  
27  
28  
29  
30  
31  
32  
33  
34  
35  
36  
37  
38  
39  
40  
41  
42  
43  
44  
45  
46  
47  
48  
49  
50  
51  
52  
53  
54  
55  
56  
57  
58  
59  
60

<sup>a</sup> Data of Aichi prefecture as reference, provided by national vital statistics, Ministry of Health, Labour and Welfare in 2014.

<sup>b</sup> Multiple births (49 pairs of twins) were excluded.

-: no available data provided, 95%CI: 95% Confidence Interval

For peer review only

**Table 4** Baseline characteristics of paired data of pregnant women and their children in the JECS-A cohort

|                                      | Sub-cohort |      |      |      |      |
|--------------------------------------|------------|------|------|------|------|
|                                      | A1         | A2   | A3   | B    | C    |
| <b>Pregnant women (n)</b>            | 3426       | 2924 | 1753 | 1352 | 1187 |
| <b>Age at Delivery</b>               |            |      |      |      |      |
| Mean                                 | 31.6       | 31.7 | 31.8 | 31.8 | 32.0 |
| SD                                   | 4.9        | 4.9  | 5.0  | 4.8  | 4.7  |
| Missing (n)                          | 44         | 14   | 7    | 0    | 0    |
| <b>Smoking habits</b>                |            |      |      |      |      |
| Never smoked (%)                     | 62.8       | 63.7 | 63.7 | 64.2 | 64.6 |
| Ex-smokers who quit before pregnancy | 21.6       | 22.0 | 23.1 | 21.8 | 23.1 |
| Smokers during early pregnancy       | 9.0        | 9.0  | 8.3  | 8.4  | 7.7  |
| Smokers                              | 2.5        | 2.5  | 2.1  | 2.8  | 2.2  |
| Missing (n)                          | 144        | 82   | 51   | 38   | 29   |
| <b>Second-hand smoking</b>           |            |      |      |      |      |
| Rarely (%)                           | 67.5       | 69.1 | 69.6 | 68.6 | 71.9 |
| A few days a week                    | 18.6       | 18.6 | 18.0 | 19.1 | 17.1 |
| Daily                                | 10.4       | 10.1 | 10.3 | 10.1 | 9.6  |
| Missing (n)                          | 124        | 66   | 36   | 30   | 17   |
| <b>Household income (JPY)</b>        |            |      |      |      |      |
| <2,000 (%)                           | 2.3        | 2.1  | 2.5  | 1.8  | 2.1  |
| 2,000-<4,000                         | 25.8       | 26.0 | 25.6 | 24.4 | 24.3 |
| 4,000-<6,000                         | 33.4       | 33.7 | 34.2 | 35.1 | 35.9 |
| 6,000-<8,000                         | 17.5       | 18.1 | 17.5 | 18.6 | 18.6 |
| 8,000-<10,000                        | 7.3        | 7.5  | 7.8  | 7.5  | 8.3  |
| ≥10,000                              | 4.5        | 4.7  | 4.5  | 3.9  | 4.5  |
| Missing (n)                          | 314        | 233  | 141  | 116  | 76   |

|                                            |        |        |        |        |        |
|--------------------------------------------|--------|--------|--------|--------|--------|
| <b>Children (n)<sup>a</sup></b>            | 3336   | 2884   | 1726   | 1346   | 1182   |
| <b>Sex (Singleton births)</b>              |        |        |        |        |        |
| Male (%)                                   | 50.5   | 50.4   | 50.1   | 49.9   | 50.4   |
| Female                                     | 49.5   | 49.6   | 49.8   | 50.1   | 49.6   |
| Missing (n)                                | 1      | 1      | 1      | 0      | 0      |
| <b>Birth weight, g (Singleton births)</b>  |        |        |        |        |        |
| Mean                                       | 3041.6 | 3052.3 | 3054.1 | 3039.1 | 3062.3 |
| SD                                         | 432.8  | 419.9  | 430.4  | 410.0  | 416.7  |
| Missing (n)                                | 22     | 15     | 9      | 4      | 7      |
| <b>Birth height, cm (Singleton births)</b> |        |        |        |        |        |
| Mean                                       | 49.6   | 49.7   | 49.7   | 49.7   | 49.7   |
| SD                                         | 2.3    | 2.2    | 2.2    | 2.1    | 2.1    |
| Missing (n)                                | 28     | 18     | 11     | 6      | 8      |

<sup>a</sup> Multiple births (twin pairs) were excluded; A1: 20 (n = 40), A2: 16 (n = 32), A3: 12 (n = 24), B: 5 (n = 10), and C: 6 (n = 12).

**Sub cohort A1**, Agreement on the adjunct questionnaire survey only; **Sub cohort A2**, Agreement on the adjunct questionnaire survey and provision of mother's biological specimen (blood and urine); **Sub cohort A3**, Agreement on the adjunct questionnaire survey and provision of mother's biological specimen (blood and urine) with genetic analysis; **Sub cohort B**, Informed consent obtained for provision of child's biological specimen from guardian (legally acceptable representatives); **Sub cohort C**, Informed consent obtained for anthropometry measurement on child hands from guardians (legally acceptable representatives). JPY: Japanese Yen, 110 JPY = 1 US\$ as of 2019



Figure 1 Study areas covered by the JECs-A

Figure 1 Study areas covered by the JECs-A

65x82mm (300 x 300 DPI)



Figure 2. Flowchart showing each stage of study recruitment for adjunct studies in the JECs-A

Figure 2. Flowchart showing each stage of study recruitment for adjunct studies in the JECs-A

178x223mm (300 x 300 DPI)
